# Supplementary material
Source: PubMed Central journal article supplement (PMC4196619)
Supplement: supp_114.169268_169268SI.pdf [file supp_114.169268_169268SI.pdf]

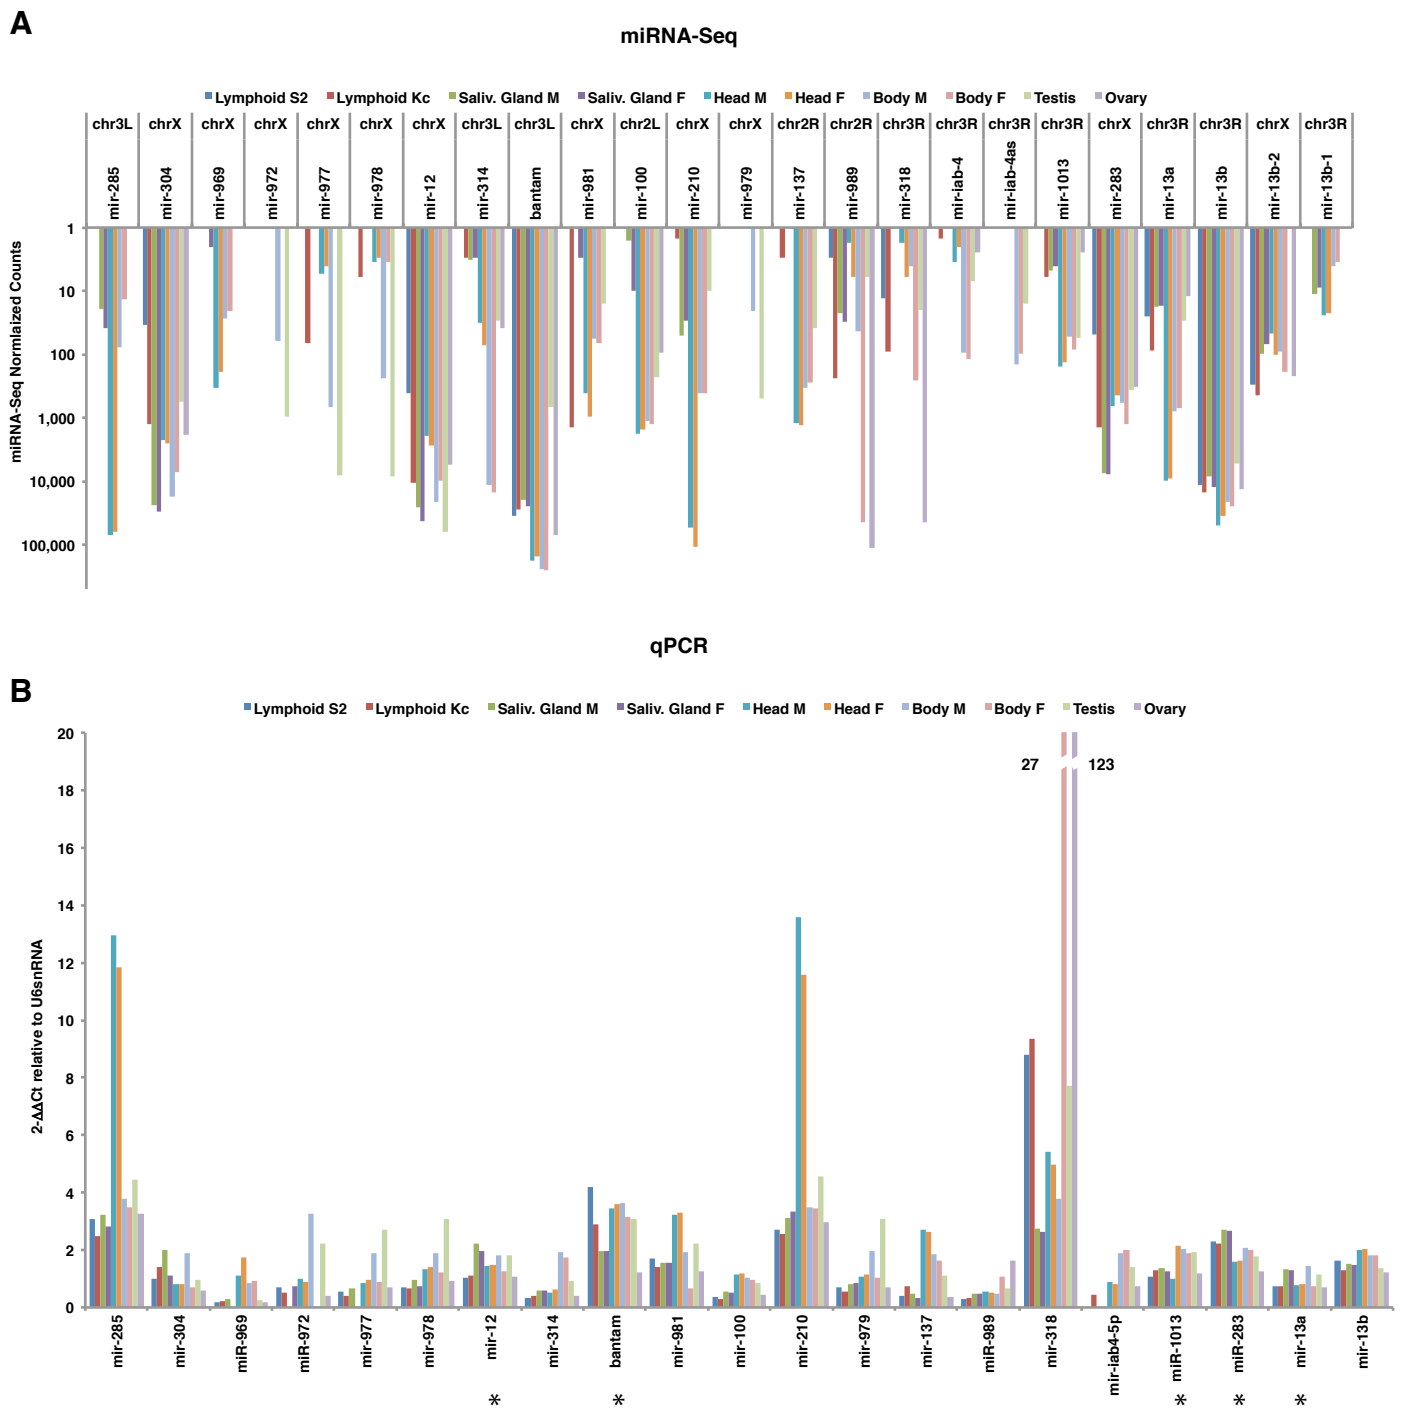

**FIGURE S1: qPCR validation of the expression levels of 22 miRNAs across all samples.** The trends of miRNA expression levels and relative abundance across all samples by miRNA-Seq (A) and qPCR (B) are similar for 16 miRNAs. Five additional miRNAs showing differences between miRNA-Seq and qPCR trends in one or more tissues (miR-12, bantam, miR-1013, miR-283, and miR-13a) are denoted with an asterisk. The genome presents several copies of mature miR-13b undistinguishable by qPCR: miR-13b and miR-13b-1 on chr3R, and miR-13b-2 on chrX. MiRNA normalized reads are reported in (A). qPCR assays were performed with at least two independent biological replicates and gave similar trends in (B). M: male ; F: female.

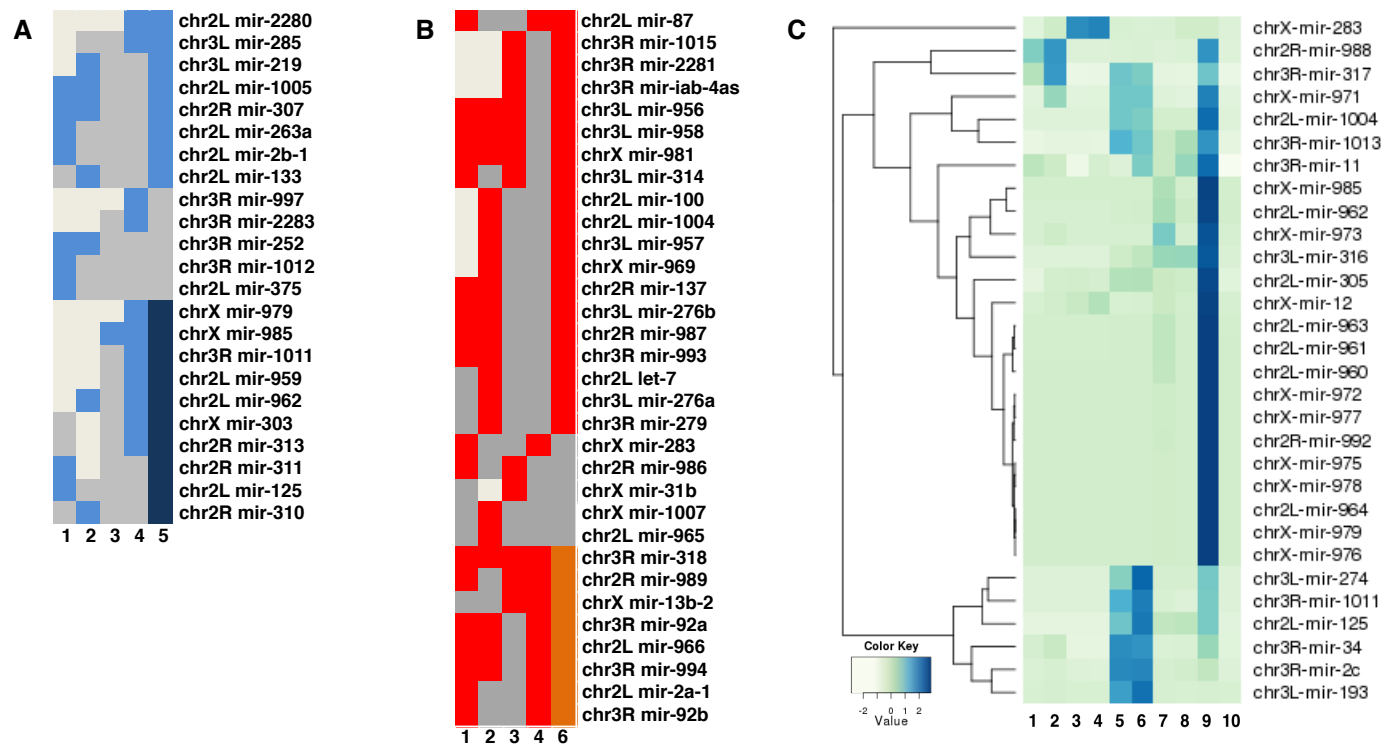

**Figure S2: Male-enriched, female-enriched and X-linked testis-enriched miRNAs.** (A) 23 miRNAs enriched in male somatic tissues in pairwise comparisons of S2 vs. Kc cells (1), male vs. female salivary glands (2), heads (3), and decapitated body (4). Colors indicate male-enriched miRNAs (light blue), miRNAs present at similar levels in both sexes (grey), poorly expressed miRNAs (white) and whether these miRNAs are more abundant in the male body (light blue) or testis (dark blue) in (5). (B) 32 female-enriched miRNAs in somatic tissues. Colors indicate female-enriched miRNAs (red), miRNAs present at similar levels in both sexes (grey), poorly expressed miRNAs (white) in somatic tissues [tissues (1) to (4)] as in (A), and whether these miRNAs are more abundant in the female body (red) or ovary (orange) in (6). (C) Relative abundance across all sexed tissues of the 30 miRNAs enriched exclusively in testis compared to the male body and not enriched in ovaries in females. 11 of the 30 testis-enriched miRNAs reside on the X chromosome. These miRNAs are highly and almost exclusively expressed in testis. S2 cells (1), Kc cells (2), male (3) and female (4) salivary glands, heads [male (5), female (6)], body [male (7), female (8)], testis (9), ovary (10).

**TABLE S1: PCR primers used in this study**

**2S rRNA depletion:**

5'-AGTCTTACAACCCTCAACCATATGTAGTCCAAGCAGCACT-3'

**qPCR (miScript assay):**

|                  |                                     |                    |
|------------------|-------------------------------------|--------------------|
| bantam-fwd       | 5'-GAGATCATTGAAAGCTGATT-3'          |                    |
| miR-12-fwd       | 5'-GAGTATTACATCAGGTACTGGT-3'        |                    |
| mir-13b-1-2-fwd  | 5'-TATCACAGCCATTTTGACGAGT-3'        |                    |
| mir-13a-fwd      | 5'-TATCACAGCCATTTTGATGAGT-3'        |                    |
| mir-283-fwd      | 5'-TAAATATCAGCTGGTAATTCT-3'         |                    |
| mir-304-fwd      | 5'-AATCTCAATTTGTAAATGTGAG-3'        |                    |
| mir-210-fwd      | 5'-TTGTGCGTGTGACAGCGGCTA-3'         |                    |
| mir-iab-4-5p-fwd | 5'-ACGTATACTGAATGTATCCTGA-3'        |                    |
| mir-iab-4-3p-fwd | 5'-GTATACCTTCAGTATACGTAAC-3'        |                    |
| mir-318-fwd      | 5'-TCACTGGGCTTTGTTTATCTCA-3'        |                    |
| mir-985-fwd      | 5'-CAAATGTTCCAATGGTTCGGGCA-3'       |                    |
| mir-979-fwd      | 5'-TTCTTCCCGAACTCAGGCTAA-3'         |                    |
| mir-981-fwd      | 5'-TTCGTTGTCGACGAAACCTGCA-3'        |                    |
| mir-977-fwd      | 5'-TGAGATATTCACGTTGTCTAA-3'         |                    |
| mir-285-fwd      | 5'-TAGCACCATTTCGAAATCAGTGC-3'       |                    |
| mir-969-fwd      | 5'-GAGTTCCACTAAGCAAGTTTT-3'         |                    |
| mir-972-fwd      | 5'-TGTACAATACGAATATTTAGGC-3'        |                    |
| mir-978-fwd      | 5'-TGTCCAGTGCCGTAATTGCAG-3'         |                    |
| mir-314-fwd      | 5'-TATTCGAGCCAATAAGTTCGG-3'         |                    |
| mir-100-fwd      | 5'-AACCCGTAAATCCGAACTTGTG-3'        |                    |
| mir-137-Fwd      | 5'-TATTGCTTGAGAATACACGTAG-3'        |                    |
| mir-989-fwd      | 5'-ATGTGATGTGACGTAGTGGAAC-3'        |                    |
| mir-1013-fwd     | 5'-AATAAAAGTATGCCGAACTCG-3'         |                    |
| mir-Spike-fwd    | 5'-CTCAGGATGGCGGAGCGGTGT-3'         | external reference |
| U6snRNA-fwd      | 5'-ATTGGAACGATACAGAGAAGATTAG-3'     | reference          |
| Dspt-4-fwd       | 5'-TTGACGCGATACCCAAGGAT-3'          | reference          |
| Dspt4-rev        | 5'-CTAGTGTGATCATAGACATTGTCCTTGTT-3' |                    |

**qPCR on sex-specific transcripts:**

|           |                              |                                           |
|-----------|------------------------------|-------------------------------------------|
| RpL32-fwd | 5'-AAGATGACCATCCGCCAGC-3'    | endogenous control                        |
| RpL32-rev | 5'-GTCGATACCCTTGGGCTTGC-3'   |                                           |
| Esg-fwd   | 5'-CGCCCATGAGATCTGAAATC-3'   |                                           |
| Esg rev   | 5'-GGTCTTGTACAATCCTTGC-3'    | ( <a href="#">Chau et al. 2009</a> )      |
| DsxM fwd  | 5'-TCCTTGGGAGCTGATGCCAC-3'   |                                           |
| DsxM rev  | 5'-GGCTACAGTGCGATTTATT-3'    |                                           |
| Yp1-fwd   | 5'-TGAGCGTCTGGAGAACATGAA-3'  |                                           |
| Yp1-rev   | 5'-GCGACAGGTGGTAGACTTGCT-3'  |                                           |
| tra1-fwd  | 5'-GGAACCCAGCATCGAGATTC-3'   |                                           |
| tra1-rev  | 5'-ATCGCCCATGGTATTCTCTTTC-3' |                                           |
| Sxl-fwd   | 5'-ACAACGACAGCAGCAGGCCA-3'   |                                           |
| Sxl-rev   | 5'-TTGTAACCACGACGCGACGAT-3'  | ( <a href="#">Hashiyama et al. 2011</a> ) |

**TABLE S2: Late embryo-derived Lymphoid S2 (male) and Kc (female) cells biased miRNAs**

**S2 biased**

| chrom | miRNA        | S2 reads | Kc reads | M/M+F   | F/M+F   | Sum reads    | % miRNA |
|-------|--------------|----------|----------|---------|---------|--------------|---------|
| chr3R | dme-mir-252  | 13294    | 205      | 0.98479 | 0.01521 | <b>13499</b> | 1.1771  |
| chr2R | dme-mir-307  | 932      | 33       | 0.96584 | 0.03416 | <b>965</b>   | 0.0841  |
| chr2L | dme-mir-263a | 66       | 4        | 0.93623 | 0.06377 | <b>70</b>    | 0.0061  |
| chrX  | dme-mir-980  | 1534     | 453      | 0.77219 | 0.22781 | <b>1987</b>  | 0.1732  |
| chr3L | dme-mir-282  | 13543    | 4622     | 0.74557 | 0.25443 | <b>18165</b> | 1.5839  |
| chr2R | dme-mir-311  | 8        | 3        | 0.72746 | 0.27254 | <b>11</b>    | 0.001   |
| chr3R | dme-mir-1012 | 164      | 63       | 0.72266 | 0.27734 | <b>227</b>   | 0.0198  |
| chr2L | dme-mir-2b-1 | 498      | 207      | 0.70658 | 0.29342 | <b>705</b>   | 0.0615  |
| chr2L | dme-mir-125  | 10       | 4        | 0.68986 | 0.31014 | <b>14</b>    | 0.0013  |
| chr2R | dme-mir-286  | 43       | 21       | 0.67209 | 0.32791 | <b>64</b>    | 0.0056  |

**Kc biased**

| chrom | miRNA        | S2   | Kc reads | M/M+F   | F/M+F   | Sum reads    | % miRNA |
|-------|--------------|------|----------|---------|---------|--------------|---------|
| chrX  | dme-mir-971  | 0    | 52       | 0       | 1       | <b>52</b>    | 0.0046  |
| chrX  | dme-mir-973  | 0    | 12       | 0       | 1       | <b>12</b>    | 0.001   |
| chrX  | dme-mir-982  | 0    | 16       | 0       | 1       | <b>16</b>    | 0.0014  |
| chrX  | dme-mir-981  | 1    | 1427     | 0.00070 | 0.99930 | <b>1428</b>  | 0.1245  |
| chr3R | dme-mir-1000 | 1    | 1299     | 0.00077 | 0.99923 | <b>1300</b>  | 0.1134  |
| chr3R | dme-mir-92a  | 13   | 2215     | 0.00584 | 0.99416 | <b>2228</b>  | 0.1943  |
| chr3R | dme-mir-1010 | 1    | 106      | 0.00931 | 0.99069 | <b>107</b>   | 0.0094  |
| chr2R | dme-mir-989  | 3    | 237      | 0.01251 | 0.98749 | <b>240</b>   | 0.0209  |
| chrX  | dme-mir-977  | 1    | 66       | 0.01494 | 0.98506 | <b>67</b>    | 0.0058  |
| chr3L | dme-mir-276b | 5    | 187      | 0.02600 | 0.97400 | <b>192</b>   | 0.0168  |
| chrX  | dme-mir-304  | 34   | 1260     | 0.02627 | 0.97373 | <b>1294</b>  | 0.1129  |
| chr2L | dme-mir-932  | 5    | 177      | 0.02750 | 0.97250 | <b>182</b>   | 0.0159  |
| chr2R | dme-mir-278  | 47   | 1647     | 0.02775 | 0.97225 | <b>1694</b>  | 0.1477  |
| chr3R | dme-mir-92b  | 20   | 670      | 0.02899 | 0.97101 | <b>690</b>   | 0.0602  |
| chr3L | dme-mir-193  | 3    | 96       | 0.03033 | 0.96967 | <b>99</b>    | 0.0086  |
| chrX  | dme-mir-283  | 48   | 1394     | 0.03330 | 0.96670 | <b>1442</b>  | 0.1257  |
| chr3L | dme-mir-958  | 1    | 28       | 0.03393 | 0.96607 | <b>29</b>    | 0.0026  |
| chr3R | dme-mir-10   | 1    | 27       | 0.03575 | 0.96425 | <b>28</b>    | 0.0024  |
| chrX  | dme-mir-12   | 415  | 10569    | 0.03778 | 0.96222 | <b>10984</b> | 0.9578  |
| chr2R | dme-mir-986  | 3    | 43       | 0.06457 | 0.93543 | <b>46</b>    | 0.0041  |
| chr2L | dme-mir-124  | 8    | 94       | 0.07812 | 0.92188 | <b>102</b>   | 0.0089  |
| chr4  | dme-mir-954  | 11   | 91       | 0.10741 | 0.89259 | <b>102</b>   | 0.0089  |
| chr3R | dme-mir-994  | 5    | 40       | 0.10998 | 0.89002 | <b>45</b>    | 0.004   |
| chr2R | dme-mir-8    | 4003 | 27812    | 0.12582 | 0.87418 | <b>31815</b> | 2.7742  |
| chr3R | dme-mir-318  | 13   | 90       | 0.12632 | 0.87368 | <b>103</b>   | 0.009   |
| chr2L | dme-mir-9b   | 2463 | 11885    | 0.17166 | 0.82834 | <b>14348</b> | 1.2511  |
| chr2L | dme-mir-2a-2 | 2015 | 9699     | 0.17202 | 0.82798 | <b>11714</b> | 1.0214  |
| chrX  | dme-mir-984  | 25   | 102      | 0.19700 | 0.80300 | <b>127</b>   | 0.0111  |
| chr2L | dme-mir-966  | 15   | 58       | 0.20424 | 0.79576 | <b>73</b>    | 0.0064  |
| chr2L | dme-mir-2b-2 | 431  | 1648     | 0.20727 | 0.79273 | <b>2079</b>  | 0.1813  |
| chr2L | dme-mir-2a   | 7839 | 29779    | 0.20838 | 0.79162 | <b>37618</b> | 3.2803  |
| chr2R | dme-mir-31a  | 5    | 18       | 0.21756 | 0.78244 | <b>23</b>    | 0.002   |

|       |              |       |        |         |         |               |         |
|-------|--------------|-------|--------|---------|---------|---------------|---------|
| chr2L | dme-mir-1    | 23    | 82     | 0.21817 | 0.78183 | <b>105</b>    | 0.0092  |
| chr3R | dme-mir-13a  | 25    | 85     | 0.22641 | 0.77359 | <b>110</b>    | 0.0096  |
| chr3L | dme-mir-276  | 4524  | 15417  | 0.22687 | 0.77313 | <b>19941</b>  | 1.7389  |
| chr2L | dme-mir-305  | 3321  | 10310  | 0.24364 | 0.75636 | <b>13631</b>  | 1.1886  |
| chr2R | dme-mir-312  | 3     | 9      | 0.25018 | 0.74982 | <b>12</b>     | 0.001   |
| chr2L | dme-mir-9c   | 1896  | 5648   | 0.25132 | 0.74868 | <b>7544</b>   | 0.6578  |
| chr2R | dme-mir-1008 | 94    | 262    | 0.26386 | 0.73614 | <b>356</b>    | 0.0311  |
| chr2L | dme-mir-275  | 461   | 1247   | 0.26994 | 0.73006 | <b>1708</b>   | 0.1489  |
| chr3L | dme-mir-190  | 171   | 462    | 0.27033 | 0.72967 | <b>633</b>    | 0.0552  |
| chr2L | dme-mir-79   | 2043  | 5420   | 0.27374 | 0.72626 | <b>7463</b>   | 0.6508  |
| chr3L | dme-mir-9a   | 49    | 124    | 0.28262 | 0.71738 | <b>173</b>    | 0.0151  |
| chr2L | dme-mir-1006 | 58    | 145    | 0.28521 | 0.71479 | <b>203</b>    | 0.0177  |
| chr2L | dme-mir-306  | 2500  | 6128   | 0.28977 | 0.71023 | <b>8628</b>   | 0.7523  |
| chr3R | dme-mir-317  | 9157  | 21083  | 0.30281 | 0.69719 | <b>30240</b>  | 2.6369  |
| chr3R | dme-mir-999  | 247   | 560    | 0.30590 | 0.69410 | <b>807</b>    | 0.0704  |
| chr2R | dme-mir-1009 | 4     | 9      | 0.30790 | 0.69210 | <b>13</b>     | 0.0011  |
| chrX  | dme-mir-983  | 6     | 13     | 0.30790 | 0.69210 | <b>19</b>     | 0.0017  |
| chr2L | dme-mir-2a-1 | 173   | 388    | 0.30831 | 0.69169 | <b>561</b>    | 0.0489  |
| chr3R | dme-mir-2c   | 9     | 19     | 0.31600 | 0.68400 | <b>28</b>     | 0.0025  |
| chr3L | dme-mir-33   | 1927  | 4040   | 0.32294 | 0.67706 | <b>5967</b>   | 0.5203  |
| chr2L | dme-mir-2b   | 9981  | 20837  | 0.32387 | 0.67613 | <b>30818</b>  | 2.6874  |
| chr2R | dme-mir-184  | 54062 | 109778 | 0.32997 | 0.67003 | <b>163840</b> | 14.2868 |

At least 10 normalized reads in the summed normalized reads were required. S2: Male (M); Kc: Female (F).

A ratio  $(F/M+F) \geq 0.66$  is female biased. A ratio  $(M/M+F) \geq 0.66$  is male biased.

**TABLE S3: Male and female biased miRNAs in L3 larval salivary glands**

**Male biased**

| chrom | miRNA        | Male S. Gland<br>reads | Female S. Gland<br>reads | M/M+F   | F/M+F   | Sum Reads    | % miRNA |
|-------|--------------|------------------------|--------------------------|---------|---------|--------------|---------|
| chr2L | dme-mir-275  | 21773                  | 2588                     | 0.89376 | 0.10624 | <b>24361</b> | 2.63097 |
| chr2R | dme-mir-1009 | 8                      | 2                        | 0.80000 | 0.20000 | <b>10</b>    | 0.00108 |
| chr2R | dme-mir-278  | 1275                   | 526                      | 0.70797 | 0.29203 | <b>1801</b>  | 0.19453 |
| chr2L | dme-mir-133  | 10                     | 4                        | 0.70588 | 0.29412 | <b>14</b>    | 0.00147 |
| chr2L | dme-mir-1005 | 26                     | 11                       | 0.69945 | 0.30055 | <b>37</b>    | 0.00395 |
| chr3R | dme-mir-252  | 1330                   | 644                      | 0.67369 | 0.32631 | <b>1974</b>  | 0.21315 |

**Female biased**

| chrom | miRNA          | Male S. Gland<br>reads | Female S. Gland<br>reads | M/M+F   | F/M+F   | Sum Reads    | % miRNA |
|-------|----------------|------------------------|--------------------------|---------|---------|--------------|---------|
| chr2L | dme-mir-100    | 2                      | 10                       | 0.13793 | 0.86207 | <b>12</b>    | 0.00125 |
| chr3L | dme-mir-282    | 6635                   | 31936                    | 0.17202 | 0.82798 | <b>38571</b> | 4.1657  |
| chr2L | dme-let-7      | 48                     | 219                      | 0.17978 | 0.82022 | <b>267</b>   | 0.02884 |
| chr3R | dme-mir-279    | 514                    | 1492                     | 0.25608 | 0.74392 | <b>2006</b>  | 0.21661 |
| chr2L | dme-mir-965    | 210                    | 567                      | 0.26989 | 0.73011 | <b>777</b>   | 0.08387 |
| chr2R | dme-mir-987    | 14                     | 36                       | 0.28571 | 0.71429 | <b>50</b>    | 0.00544 |
| chr2L | dme-mir-305-as | 3                      | 7                        | 0.31373 | 0.68627 | <b>10</b>    | 0.0011  |
| chr3R | dme-mir-92a    | 3                      | 7                        | 0.31373 | 0.68627 | <b>10</b>    | 0.0011  |
| chr3L | dme-mir-957    | 3                      | 7                        | 0.31373 | 0.68627 | <b>10</b>    | 0.0011  |
| chr2R | dme-mir-307-as | 8                      | 17                       | 0.32000 | 0.68000 | <b>25</b>    | 0.0027  |
| chr3L | dme-mir-276a   | 1853                   | 3728                     | 0.33200 | 0.66800 | <b>5581</b>  | 0.60273 |
| chr3L | dme-mir-285    | 19                     | 38                       | 0.33566 | 0.66434 | <b>57</b>    | 0.00618 |

At least 10 normalized reads in the summed normalized reads were required. M: male ; F: female.

A ratio (F/M+F) >=0.66 is female biased in salivary glands (S. glands). A ratio( M/M+F) >=0.66 is male biased.

**TABLE S4: Male and female biased miRNAs in adult heads**

**Male biased**

| chrom | miRNA          | Male Head<br>reads | Female Head<br>reads | M/M+F   | F/M+F   | Sum Reads     | % miRNA  |
|-------|----------------|--------------------|----------------------|---------|---------|---------------|----------|
| chrX  | dme-mir-974    | 9                  | 2                    | 0.81405 | 0.18595 | <b>11</b>     | 0.000247 |
| chr3L | dme-mir-190    | 2189               | 634                  | 0.77540 | 0.22460 | <b>2823</b>   | 0.06472  |
| chr2L | dme-mir-305-as | 21                 | 8                    | 0.72426 | 0.27574 | <b>29</b>     | 0.000665 |
| chr3L | dme-mir-276    | 119752             | 58112                | 0.67328 | 0.32672 | <b>177864</b> | 4.077941 |
| chr2R | dme-mir-1008   | 208                | 104                  | 0.66707 | 0.33293 | <b>312</b>    | 0.007162 |

**Female biased**

| chrom | miRNA         | Male Head<br>reads | Female Head<br>reads | M/M+F   | F/M+F   | Sum Reads     | % miRNA  |
|-------|---------------|--------------------|----------------------|---------|---------|---------------|----------|
| chr3L | dme-mir-958   | 5                  | 29                   | 0.15336 | 0.84664 | <b>34</b>     | 0.000785 |
| chrX  | dme-mir-31b   | 12                 | 44                   | 0.21788 | 0.78212 | <b>56</b>     | 0.00129  |
| chr2L | dme-mir-964   | 12                 | 41                   | 0.23015 | 0.76985 | <b>53</b>     | 0.001221 |
| chr3L | dme-mir-956   | 7                  | 20                   | 0.25938 | 0.74062 | <b>27</b>     | 0.000619 |
| chrX  | dme-mir-980   | 611                | 1464                 | 0.29450 | 0.70550 | <b>2075</b>   | 0.047577 |
| chrX  | dme-mir-981   | 404                | 968                  | 0.29472 | 0.70528 | <b>1372</b>   | 0.031468 |
| chr3L | dme-mir-274   | 24301              | 55708                | 0.30373 | 0.69627 | <b>80009</b>  | 1.834398 |
| chr3L | dme-mir-314   | 32                 | 72                   | 0.30448 | 0.69552 | <b>104</b>    | 0.002373 |
| chr2L | dme-mir-961   | 9                  | 20                   | 0.30448 | 0.69552 | <b>29</b>     | 0.000659 |
| chr2L | dme-mir-963   | 9                  | 20                   | 0.30448 | 0.69552 | <b>29</b>     | 0.000659 |
| chr3R | dme-mir-284   | 907                | 2009                 | 0.31105 | 0.68895 | <b>2916</b>   | 0.066857 |
| chr2R | dme-mir-286   | 7                  | 15                   | 0.31831 | 0.68169 | <b>22</b>     | 0.000504 |
| chr2L | dme-mir-275   | 1170               | 2503                 | 0.31849 | 0.68151 | <b>3673</b>   | 0.084205 |
| chrX  | dme-mir-13b-2 | 47                 | 101                  | 0.31885 | 0.68115 | <b>148</b>    | 0.0034   |
| chr2R | dme-mir-986   | 475                | 1006                 | 0.32052 | 0.67948 | <b>1481</b>   | 0.033945 |
| chrX  | dme-mir-210   | 54115              | 106957               | 0.33597 | 0.66403 | <b>161072</b> | 3.692947 |
| chr3R | dme-mir-11    | 10872              | 21450                | 0.33637 | 0.66363 | <b>32322</b>  | 0.741065 |
| chr2L | dme-mir-960   | 53                 | 103                  | 0.33776 | 0.66224 | <b>156</b>    | 0.003566 |
| chr2L | dme-mir-133   | 8468               | 16473                | 0.33953 | 0.66047 | <b>24941</b>  | 0.571834 |

At least 10 normalized reads in the summed normalized reads were required.

A ratio (F/M+F) >=0.66 is female biased in the head. A ratio(M/M+F) >=0.66 is male biased. F: female; M: Male.

**TABLE S5: Male vs. female biased miRNAs in the adult body**

**Male body biased**

| chrom | miRNA        | Male Body<br>reads | Female Body<br>reads | M/M+F   | F/M+F   | Sum Reads    | % miRNA     |
|-------|--------------|--------------------|----------------------|---------|---------|--------------|-------------|
| chrX  | dme-mir-972  | 61                 | 0                    | 1       | 0       | <b>61</b>    | 0.001355886 |
| chrX  | dme-mir-975  | 33                 | 0                    | 1       | 0       | <b>33</b>    | 0.000733512 |
| chrX  | dme-mir-977  | 680                | 0                    | 1       | 0       | <b>680</b>   | 0.015114796 |
| chrX  | dme-mir-979  | 21                 | 0                    | 1       | 0       | <b>21</b>    | 0.00046678  |
| chr3R | dme-mir-997  | 184                | 0                    | 1       | 0       | <b>184</b>   | 0.004089886 |
| chrX  | dme-mir-978  | 241                | 3                    | 0.98597 | 0.01403 | <b>244</b>   | 0.00543307  |
| chrX  | dme-mir-974  | 236                | 3                    | 0.98568 | 0.01432 | <b>239</b>   | 0.005321932 |
| chrX  | dme-mir-976  | 380                | 7                    | 0.98227 | 0.01773 | <b>387</b>   | 0.008598921 |
| chr2L | dme-mir-959  | 478                | 10                   | 0.97894 | 0.02106 | <b>488</b>   | 0.010853439 |
| chrX  | dme-mir-303  | 142                | 3                    | 0.97642 | 0.02358 | <b>145</b>   | 0.003232534 |
| chrX  | dme-mir-985  | 214                | 7                    | 0.96895 | 0.03105 | <b>221</b>   | 0.004909133 |
| chrX  | dme-mir-983  | 724                | 24                   | 0.96791 | 0.03209 | <b>748</b>   | 0.016626275 |
| chrX  | dme-mir-984  | 551                | 24                   | 0.95826 | 0.04174 | <b>575</b>   | 0.012780893 |
| chrX  | dme-mir-973  | 76                 | 3                    | 0.95683 | 0.04317 | <b>79</b>    | 0.00176551  |
| chr2L | dme-mir-963  | 368                | 21                   | 0.94706 | 0.05294 | <b>389</b>   | 0.008637026 |
| chr2R | dme-mir-991  | 120                | 7                    | 0.94595 | 0.05405 | <b>127</b>   | 0.002819735 |
| chr2L | dme-mir-960  | 1717               | 117                  | 0.93642 | 0.06358 | <b>1834</b>  | 0.040755964 |
| chr2R | dme-mir-992  | 45                 | 3                    | 0.92920 | 0.07080 | <b>48</b>    | 0.001076453 |
| chr2L | dme-mir-964  | 437                | 34                   | 0.92725 | 0.07275 | <b>471</b>   | 0.010475569 |
| chrX  | dme-mir-982  | 118                | 10                   | 0.91982 | 0.08018 | <b>128</b>   | 0.002851489 |
| chr2L | dme-mir-961  | 177                | 17                   | 0.91170 | 0.08830 | <b>194</b>   | 0.004315337 |
| chr3L | dme-mir-285  | 76                 | 14                   | 0.84713 | 0.15287 | <b>90</b>    | 0.001994137 |
| chr2R | dme-mir-1009 | 38                 | 10                   | 0.78698 | 0.21302 | <b>48</b>    | 0.001073277 |
| chr3L | dme-mir-193  | 12                 | 3                    | 0.77778 | 0.22222 | <b>15</b>    | 0.000342941 |
| chr2L | dme-mir-962  | 401                | 134                  | 0.74993 | 0.25007 | <b>535</b>   | 0.011885434 |
| chrX  | dme-mir-304  | 17186              | 7227                 | 0.70396 | 0.29604 | <b>24413</b> | 0.542652738 |
| chrX  | dme-mir-12   | 21306              | 9603                 | 0.68930 | 0.31070 | <b>30909</b> | 0.687043433 |
| chr2R | dme-mir-313  | 59                 | 27                   | 0.68264 | 0.31736 | <b>86</b>    | 0.001921103 |

**Female body biased**

| chrom | miRNA         | Male Body<br>reads | Female Body<br>reads | M/M+F   | F/M+F   | Sum Reads     | % miRNA     |
|-------|---------------|--------------------|----------------------|---------|---------|---------------|-------------|
| chr2R | dme-mir-989   | 44                 | 45010                | 0.00098 | 0.99902 | <b>45054</b>  | 1.001449337 |
| chr3R | dme-mir-318   | 4                  | 261                  | 0.01512 | 0.98488 | <b>265</b>    | 0.005880792 |
| chr3R | dme-mir-994   | 4                  | 261                  | 0.01512 | 0.98488 | <b>265</b>    | 0.005880792 |
| chr3R | dme-mir-92b   | 42                 | 233                  | 0.15265 | 0.84735 | <b>275</b>    | 0.006115771 |
| chr2L | dme-mir-966   | 5                  | 21                   | 0.19553 | 0.80447 | <b>26</b>     | 0.000568392 |
| chr2L | dme-mir-2a-1  | 21                 | 75                   | 0.21778 | 0.78222 | <b>96</b>     | 0.002143378 |
| chr3L | dme-mir-190   | 162                | 579                  | 0.21850 | 0.78150 | <b>741</b>    | 0.016480193 |
| chr3L | dme-mir-276   | 47955              | 128270               | 0.27212 | 0.72788 | <b>176225</b> | 3.917056396 |
| chr2L | dme-mir-275   | 1122               | 2616                 | 0.30016 | 0.69984 | <b>3738</b>   | 0.083086855 |
| chr3R | dme-mir-92a   | 254                | 579                  | 0.30477 | 0.69523 | <b>833</b>    | 0.018525136 |
| chrX  | dme-mir-283   | 577                | 1245                 | 0.31676 | 0.68324 | <b>1822</b>   | 0.040489204 |
| chrX  | dme-mir-13b-2 | 92                 | 189                  | 0.32790 | 0.67210 | <b>281</b>    | 0.006236436 |



|       |            |     |      |         |         |             |             |
|-------|------------|-----|------|---------|---------|-------------|-------------|
| chr2L | dme-mir-87 | 908 | 1834 | 0.33111 | 0.66889 | <b>2742</b> | 0.060954495 |
|-------|------------|-----|------|---------|---------|-------------|-------------|

At least 10 normalized reads in the summed normalized reads were required.

A ratio  $(F/M+F) \geq 0.66$  is female biased. A ratio  $(M/M+F) \geq 0.66$  is male biased. F: female; M: male.

TABLE S6: Testis and Ovary biased miRNAs

Testis biased

| chrom | miRNA           | Testes<br>reads | Ovary<br>reads | T/Ov+T  | Ov/T+Ov | Sum Reads | % miRNA     |             |
|-------|-----------------|-----------------|----------------|---------|---------|-----------|-------------|-------------|
| chr2L | dme-mir-1004    | 144             | 0              | 0       | 1       | 0         | 144         | 0.01472903  |
| chr2R | dme-mir-137     | 38              | 0              | 0       | 1       | 0         | 38          | 0.003886827 |
| chrX  | dme-mir-210     | 10              | 0              | 0       | 1       | 0         | 10          | 0.001022849 |
| chr3L | dme-mir-263b    | 13              | 0              | 0       | 1       | 0         | 13          | 0.001329704 |
| chr3L | dme-mir-315     | 12              | 0              | 0       | 1       | 0         | 12          | 0.001227419 |
| chr2L | dme-mir-375     | 1491            | 0              | 0       | 1       | 0         | 1491        | 0.152506835 |
| chrX  | dme-mir-971     | 33              | 0              | 0       | 1       | 0         | 33          | 0.003375403 |
| chrX  | dme-mir-972     | 961             | 0              | 0       | 1       | 0         | 961         | 0.098295821 |
| chrX  | dme-mir-973     | 51              | 0              | 0       | 1       | 0         | 51          | 0.005216532 |
| chrX  | dme-mir-974     | 82              | 0              | 0       | 1       | 0         | 82          | 0.008387364 |
| chrX  | dme-mir-975     | 2134            | 0              | 0       | 1       | 0         | 2134        | 0.218276047 |
| chrX  | dme-mir-976     | 7525            | 0              | 0       | 1       | 0         | 7525        | 0.76969412  |
| chrX  | dme-mir-977     | 8100            | 0              | 0       | 1       | 0         | 8100        | 0.828507956 |
| chrX  | dme-mir-978     | 8457            | 0              | 0       | 1       | 0         | 8457        | 0.865023677 |
| chrX  | dme-mir-979     | 497             | 0              | 0       | 1       | 0         | 497         | 0.050835612 |
| chrX  | dme-mir-981     | 16              | 0              | 0       | 1       | 0         | 16          | 0.001636559 |
| chr2R | dme-mir-992     | 395             | 0              | 0       | 1       | 0         | 395         | 0.040402548 |
| chr3R | dme-mir-997     | 59              | 0              | 0       | 1       | 0         | 59          | 0.006034811 |
| chr3R | dme-mir-iab-4as | 16              | 0              | 0       | 1       | 0         | 16          | 0.001636559 |
| chr2L | dme-mir-959     | 17252           | 10             | 0.99943 | 0.00057 | 17262     | 1.765620246 |             |
| chr2L | dme-mir-964     | 10115           | 12             | 0.99879 | 0.00121 | 10127     | 1.035862826 |             |
| chr3L | dme-mir-274     | 7928            | 12             | 0.99846 | 0.00154 | 7940      | 0.812165678 |             |
| chr2L | dme-mir-963     | 926             | 2              | 0.99737 | 0.00263 | 928       | 0.094965994 |             |
| chr2L | dme-mir-960     | 5436            | 27             | 0.99508 | 0.00492 | 5463      | 0.558772501 |             |
| chrX  | dme-mir-985     | 321             | 2              | 0.99244 | 0.00756 | 323       | 0.033083609 |             |
| chr3L | dme-mir-9a      | 6846            | 98             | 0.98591 | 0.01409 | 6944      | 0.710248489 |             |
| chr2L | dme-mir-124     | 151             | 2              | 0.98406 | 0.01594 | 153       | 0.015695171 |             |
| chr3R | dme-mir-277     | 9542            | 213            | 0.97819 | 0.02181 | 9755      | 0.997765528 |             |
| chr2L | dme-mir-961     | 477             | 12             | 0.97501 | 0.02499 | 489       | 0.050040643 |             |
| chr3R | dme-mir-1013    | 54              | 2              | 0.95667 | 0.04333 | 56        | 0.005773532 |             |
| chr3R | dme-mir-252     | 990             | 51             | 0.95068 | 0.04932 | 1041      | 0.106515149 |             |
| chr2L | dme-mir-133     | 38              | 2              | 0.93953 | 0.06047 | 40        | 0.004136973 |             |
| chr2R | dme-mir-991     | 127             | 10             | 0.92848 | 0.07152 | 137       | 0.01399077  |             |
| chr2R | dme-mir-988     | 6587            | 523            | 0.92640 | 0.07360 | 7110      | 0.727282088 |             |
| chr2R | dme-mir-310     | 3356            | 289            | 0.92082 | 0.07918 | 3645      | 0.372785458 |             |
| chrX  | dme-mir-12      | 62228           | 5576           | 0.91776 | 0.08224 | 67804     | 6.935319591 |             |
| chr2L | dme-mir-932     | 45              | 5              | 0.90196 | 0.09804 | 50        | 0.005103114 |             |
| chr3R | dme-mir-1010    | 168             | 20             | 0.89569 | 0.10431 | 188       | 0.019185036 |             |
| chr2R | dme-mir-278     | 2426            | 286            | 0.89450 | 0.10550 | 2712      | 0.277410324 |             |
| chr3R | dme-mir-2c      | 19              | 2              | 0.88596 | 0.11404 | 21        | 0.00219356  |             |
| chrX  | dme-mir-983     | 6732            | 1010           | 0.86954 | 0.13046 | 7742      | 0.791892449 |             |
| chr2R | dme-mir-311     | 3582            | 582            | 0.86022 | 0.13978 | 4164      | 0.425919368 |             |
| chr2L | dme-mir-962     | 471             | 81             | 0.85372 | 0.14628 | 552       | 0.05643102  |             |
| chr2L | dme-mir-125     | 3331            | 614            | 0.84439 | 0.15561 | 3945      | 0.403497747 |             |

|       |              |       |      |         |         |              |             |
|-------|--------------|-------|------|---------|---------|--------------|-------------|
| chr3L | dme-mir-316  | 4417  | 814  | 0.84433 | 0.15567 | <b>5231</b>  | 0.535091153 |
| chr2L | dme-let-7    | 11559 | 2179 | 0.84139 | 0.15861 | <b>13738</b> | 1.405191589 |
| chr2R | dme-mir-1008 | 11    | 2    | 0.81811 | 0.18189 | <b>13</b>    | 0.00137528  |
| chr3R | dme-mir-999  | 673   | 179  | 0.79034 | 0.20966 | <b>852</b>   | 0.087098415 |
| chr3R | dme-mir-317  | 4489  | 1294 | 0.77628 | 0.22372 | <b>5783</b>  | 0.591484276 |
| chr2L | dme-mir-305  | 18583 | 6588 | 0.73826 | 0.26174 | <b>25171</b> | 2.574654122 |
| chr3L | dme-mir-956  | 54    | 22   | 0.71043 | 0.28957 | <b>76</b>    | 0.0077747   |
| chr2L | dme-mir-100  | 226   | 93   | 0.70861 | 0.29139 | <b>319</b>   | 0.032621941 |
| chr3R | dme-mir-13a  | 29    | 12   | 0.70341 | 0.29659 | <b>41</b>    | 0.004216993 |
| chrX  | dme-mir-31b  | 875   | 416  | 0.67790 | 0.32210 | <b>1291</b>  | 0.132024129 |

#### Ovary biased

| chrom | miRNA         | Testes reads | Ovary reads | T/Ov+T  | Ov/T+Ov | Sum Reads     | % miRNA     |
|-------|---------------|--------------|-------------|---------|---------|---------------|-------------|
| chr2R | dme-mir-989   | 6            | 111853      | 0.00005 | 0.99995 | <b>111859</b> | 11.44153945 |
| chr3R | dme-mir-318   | 20           | 44135       | 0.00045 | 0.99955 | <b>44155</b>  | 4.516429825 |
| chr3R | dme-mir-994   | 19           | 18298       | 0.00104 | 0.99896 | <b>18317</b>  | 1.873535481 |
| chr2L | dme-mir-2b-1  | 2            | 460         | 0.00433 | 0.99567 | <b>462</b>    | 0.04723201  |
| chrX  | dme-mir-13b-2 | 1            | 218         | 0.00457 | 0.99543 | <b>219</b>    | 0.022365275 |
| chr3R | dme-mir-996   | 348          | 36033       | 0.00957 | 0.99043 | <b>36381</b>  | 3.72124572  |
| chr3L | dme-bantam    | 687          | 69609       | 0.00977 | 0.99023 | <b>70296</b>  | 7.190174187 |
| chr2R | dme-mir-184   | 540          | 38992       | 0.01366 | 0.98634 | <b>39532</b>  | 4.043561038 |
| chr2R | dme-mir-1009  | 5            | 220         | 0.02221 | 0.97779 | <b>225</b>    | 0.023024561 |
| chr2L | dme-mir-965   | 9            | 355         | 0.02475 | 0.97525 | <b>364</b>    | 0.037191728 |
| chr2L | dme-mir-79    | 219          | 8506        | 0.02510 | 0.97490 | <b>8725</b>   | 0.892408047 |
| chr2L | dme-mir-263a  | 245          | 8899        | 0.02679 | 0.97321 | <b>9144</b>   | 0.935340954 |
| chr3L | dme-mir-33    | 166          | 5092        | 0.03157 | 0.96843 | <b>5258</b>   | 0.537783186 |
| chr2L | dme-mir-2b-2  | 40           | 1091        | 0.03538 | 0.96462 | <b>1131</b>   | 0.115656495 |
| chr2R | dme-mir-308   | 30           | 790         | 0.03659 | 0.96341 | <b>820</b>    | 0.083865693 |
| chr2L | dme-mir-275   | 605          | 15923       | 0.03660 | 0.96340 | <b>16528</b>  | 1.690582725 |
| chr3L | dme-mir-276   | 123          | 3194        | 0.03708 | 0.96292 | <b>3317</b>   | 0.33927167  |
| chr2R | dme-mir-281-2 | 21           | 430         | 0.04652 | 0.95348 | <b>451</b>    | 0.046173672 |
| chr3R | dme-mir-995   | 228          | 4654        | 0.04670 | 0.95330 | <b>4882</b>   | 0.499348725 |
| chr2L | dme-mir-1     | 241          | 3788        | 0.05981 | 0.94019 | <b>4029</b>   | 0.41212676  |
| chr2R | dme-mir-307   | 42           | 599         | 0.06551 | 0.93449 | <b>641</b>    | 0.065581727 |
| chr3R | dme-mir-998   | 84           | 986         | 0.07854 | 0.92146 | <b>1070</b>   | 0.109400756 |
| chr2L | dme-mir-87    | 12           | 139         | 0.07926 | 0.92074 | <b>151</b>    | 0.015485739 |
| chr2L | dme-mir-2a-1  | 13           | 149         | 0.08016 | 0.91984 | <b>162</b>    | 0.016588608 |
| chr2L | dme-mir-1005  | 3            | 34          | 0.08056 | 0.91944 | <b>37</b>     | 0.003808898 |
| chr2R | dme-mir-281-1 | 143          | 1277        | 0.10073 | 0.89927 | <b>1420</b>   | 0.145202936 |
| chr2L | dme-mir-966   | 6            | 51          | 0.10461 | 0.89539 | <b>57</b>     | 0.005866775 |
| chr2L | dme-mir-2a-2  | 112          | 829         | 0.11902 | 0.88098 | <b>941</b>    | 0.096255393 |
| chr3R | dme-mir-929   | 4            | 29          | 0.11995 | 0.88005 | <b>33</b>     | 0.003410891 |
| chr2R | dme-mir-313   | 370          | 1538        | 0.19389 | 0.80611 | <b>1908</b>   | 0.195187234 |
| chrX  | dme-mir-1007  | 6            | 24          | 0.19701 | 0.80299 | <b>30</b>     | 0.003115169 |
| chr3R | dme-mir-284   | 16           | 56          | 0.22146 | 0.77854 | <b>72</b>     | 0.007389916 |
| chr2R | dme-mir-7     | 863          | 2981        | 0.22450 | 0.77550 | <b>3844</b>   | 0.393199821 |
| chr3L | dme-mir-190   | 13           | 44          | 0.22799 | 0.77201 | <b>57</b>     | 0.005832331 |
| chr2L | dme-mir-2b    | 6058         | 20095       | 0.23163 | 0.76837 | <b>26153</b>  | 2.675091471 |

|       |              |       |       |         |         |              |             |
|-------|--------------|-------|-------|---------|---------|--------------|-------------|
| chr2L | dme-mir-2a   | 14216 | 47031 | 0.23211 | 0.76789 | <b>61247</b> | 6.264639548 |
| chrX  | dme-mir-304  | 556   | 1817  | 0.23430 | 0.76570 | <b>2373</b>  | 0.24272887  |
| chr2L | dme-mir-9c   | 2050  | 5715  | 0.26399 | 0.73601 | <b>7765</b>  | 0.794275219 |
| chr2L | dme-mir-306  | 951   | 2472  | 0.27779 | 0.72221 | <b>3423</b>  | 0.350170536 |
| chr3R | dme-mir-13b  | 5212  | 13392 | 0.28015 | 0.71985 | <b>18604</b> | 1.902908343 |
| chr2R | dme-mir-986  | 309   | 736   | 0.29566 | 0.70434 | <b>1045</b>  | 0.106899978 |
| chr3R | dme-mir-1012 | 46    | 98    | 0.31984 | 0.68016 | <b>144</b>   | 0.014710945 |
| chr2R | dme-mir-312  | 1704  | 3546  | 0.32457 | 0.67543 | <b>5250</b>  | 0.537005167 |
| chr2L | dme-mir-9b   | 6727  | 13372 | 0.33469 | 0.66531 | <b>20099</b> | 2.055868849 |

At least 10 normalized reads in the summed normalized reads in male and female gonads are required.

A ratio (Testis/Ovary+Testis)  $\geq 0.66$  is Testis biased. A ratio (Ovary/Ovary +Testis)  $\geq 0.66$  is Ovary biased

T: Testis; Ov: Ovaries

TABLE S7: miRNAs with testis vs. male body biases

Male Body (male somatic tissues) biased miRNAs

| chrom | miRNA         | Male Body<br>reads | Testis<br>reads | BM/BM+T | Testis/BM+T | Sum reads | % miRNA     |             |
|-------|---------------|--------------------|-----------------|---------|-------------|-----------|-------------|-------------|
| chr3R | dme-mir-1014  | 248                | 0               | 0       | 1           | 0         | 248         | 0.007666282 |
| chr3L | dme-mir-285   | 76                 | 0               | 0       | 1           | 0         | 76          | 0.002349344 |
| chr2R | dme-mir-5     | 14                 | 0               | 0       | 1           | 0         | 14          | 0.000432774 |
| chrX  | dme-mir-927   | 41                 | 0               | 0       | 1           | 0         | 41          | 0.001267409 |
| chr3L | dme-mir-957   | 839                | 0               | 0       | 1           | 0         | 839         | 0.025935526 |
| chrX  | dme-mir-969   | 27                 | 0               | 0       | 1           | 0         | 27          | 0.000834636 |
| chr2L | dme-mir-1     | 496888             | 844             | 0.99831 | 0.00169     | 497732    | 15.38608851 |             |
| chr3R | dme-mir-993   | 1448               | 4               | 0.99759 | 0.00241     | 1452      | 0.044869387 |             |
| chr3R | dme-mir-1000  | 875                | 4               | 0.99602 | 0.00398     | 879       | 0.027156567 |             |
| chr3L | dme-mir-958   | 7379               | 32              | 0.99575 | 0.00425     | 7411      | 0.229076539 |             |
| chr3R | dme-mir-929   | 1810               | 14              | 0.99232 | 0.00768     | 1824      | 0.056384267 |             |
| chr3L | dme-mir-314   | 11627              | 102             | 0.99135 | 0.00865     | 11729     | 0.362556399 |             |
| chr3L | dme-mir-276   | 47955              | 431             | 0.99110 | 0.00890     | 48386     | 1.495713233 |             |
| chr3L | dme-bantam    | 244113             | 2405            | 0.99025 | 0.00975     | 246518    | 7.620454209 |             |
| chr2L | dme-mir-2b-1  | 623                | 7               | 0.98889 | 0.01111     | 630       | 0.019474829 |             |
| chr2R | dme-mir-987   | 803                | 11              | 0.98709 | 0.01291     | 814       | 0.025147259 |             |
| chr2R | dme-mir-281-2 | 5100               | 74              | 0.98579 | 0.01421     | 5174      | 0.159925441 |             |
| chr3L | dme-mir-276b  | 530                | 11              | 0.98057 | 0.01943     | 541       | 0.016708167 |             |
| chr2L | dme-mir-965   | 1129               | 32              | 0.97286 | 0.02714     | 1161      | 0.035873872 |             |
| chr2R | dme-mir-281-1 | 17602              | 501             | 0.97235 | 0.02765     | 18103     | 0.559592219 |             |
| chr3R | dme-mir-10    | 19132              | 599             | 0.96967 | 0.03033     | 19731     | 0.609917652 |             |
| chrX  | dme-mir-13b-2 | 92                 | 4               | 0.96335 | 0.03665     | 96        | 0.002952137 |             |
| chr3L | dme-mir-263b  | 1144               | 46              | 0.96175 | 0.03825     | 1190      | 0.036770333 |             |
| chr3R | dme-mir-996   | 29997              | 1218            | 0.96098 | 0.03902     | 31215     | 0.964931435 |             |
| chr3L | dme-mir-219   | 84                 | 4               | 0.96000 | 0.04000     | 88        | 0.002704837 |             |
| chr3L | dme-mir-956   | 4342               | 189             | 0.95829 | 0.04171     | 4531      | 0.140064211 |             |
| chr2L | dme-mir-87    | 908                | 42              | 0.95579 | 0.04421     | 950       | 0.029366807 |             |
| chr2R | dme-mir-308   | 1864               | 105             | 0.94667 | 0.05333     | 1969      | 0.060866571 |             |
| chr3L | dme-mir-33    | 9633               | 581             | 0.94312 | 0.05688     | 10214     | 0.315739544 |             |
| chr2L | dme-mir-79    | 12143              | 767             | 0.94063 | 0.05937     | 12910     | 0.399063995 |             |
| chr3R | dme-mir-1001  | 106                | 7               | 0.93805 | 0.06195     | 113       | 0.003493104 |             |
| chr2R | dme-mir-307   | 2063               | 147             | 0.93348 | 0.06652     | 2210      | 0.068316467 |             |
| chr2L | dme-mir-263a  | 11829              | 858             | 0.93241 | 0.06759     | 12687     | 0.392170527 |             |
| chrX  | dme-mir-210   | 409                | 35              | 0.92117 | 0.07883     | 444       | 0.013725119 |             |
| chr2L | dme-mir-1005  | 122                | 11              | 0.92075 | 0.07925     | 133       | 0.004095897 |             |
| chr3L | dme-mir-276a  | 90583              | 7868            | 0.92008 | 0.07992     | 98451     | 3.043359558 |             |
| chr3R | dme-mir-284   | 523                | 56              | 0.90328 | 0.09672     | 579       | 0.017898297 |             |
| chr3R | dme-mir-1015  | 62                 | 7               | 0.89855 | 0.10145     | 69        | 0.002132958 |             |
| chrX  | dme-mir-304   | 17186              | 1946            | 0.89829 | 0.10171     | 19132     | 0.591416607 |             |
| chr2R | dme-mir-184   | 15336              | 1890            | 0.89028 | 0.10972     | 17226     | 0.53249752  |             |
| chr2L | dme-mir-133   | 1065               | 133             | 0.88898 | 0.11102     | 1198      | 0.037033091 |             |
| chr2L | dme-mir-1006  | 415                | 53              | 0.88770 | 0.11230     | 468       | 0.014451561 |             |
| chr3R | dme-mir-13a   | 797                | 102             | 0.88703 | 0.11297     | 899       | 0.027774818 |             |
| chr3R | dme-mir-1017  | 25                 | 4               | 0.87719 | 0.12281     | 29        | 0.000881004 |             |

|       |                 |        |        |         |         |               |             |
|-------|-----------------|--------|--------|---------|---------|---------------|-------------|
| chr2R | dme-mir-31a     | 24842  | 3969   | 0.86224 | 0.13776 | <b>28811</b>  | 0.890618047 |
| chrX  | dme-mir-980     | 2995   | 539    | 0.84748 | 0.15252 | <b>3534</b>   | 0.109244532 |
| chr2L | dme-mir-124     | 2863   | 529    | 0.84417 | 0.15583 | <b>3392</b>   | 0.104839511 |
| chr2L | dme-mir-2b-2    | 615    | 140    | 0.81457 | 0.18543 | <b>755</b>    | 0.023338886 |
| chr3R | dme-mir-iab-4   | 94     | 25     | 0.79325 | 0.20675 | <b>119</b>    | 0.003663123 |
| chr3R | dme-mir-998     | 1074   | 294    | 0.78509 | 0.21491 | <b>1368</b>   | 0.042288209 |
| chr3L | dme-mir-190     | 162    | 46     | 0.78072 | 0.21928 | <b>208</b>    | 0.00641433  |
| chr2R | dme-mir-1008    | 106    | 39     | 0.73356 | 0.26644 | <b>145</b>    | 0.004466847 |
| chr3R | dme-mir-279     | 14571  | 5439   | 0.72819 | 0.27181 | <b>20010</b>  | 0.618557825 |
| chr2L | dme-mir-2a-2    | 1047   | 392    | 0.72759 | 0.27241 | <b>1439</b>   | 0.044482994 |
| chr3R | dme-mir-iab-4as | 144    | 56     | 0.72000 | 0.28000 | <b>200</b>    | 0.006182487 |
| chr2R | dme-mir-137     | 341    | 133    | 0.71941 | 0.28059 | <b>474</b>    | 0.014652494 |
| chr3L | dme-mir-955     | 59     | 25     | 0.70659 | 0.29341 | <b>84</b>     | 0.002581188 |
| chr3R | dme-mir-277     | 76053  | 33397  | 0.69487 | 0.30513 | <b>109450</b> | 3.383366128 |
| chr2R | dme-mir-8       | 447346 | 198170 | 0.69301 | 0.30699 | <b>645516</b> | 19.95447212 |
| chrX  | dme-mir-1007    | 47     | 21     | 0.69118 | 0.30882 | <b>68</b>     | 0.002102046 |
| chr2R | dme-mir-1009    | 38     | 18     | 0.68468 | 0.31532 | <b>56</b>     | 0.00171564  |
| chr2R | dme-mir-989     | 44     | 21     | 0.67692 | 0.32308 | <b>65</b>     | 0.002009308 |

#### Testis enriched miRNAs

| chrom | miRNA        | Male Body<br>reads | Testis<br>reads | BM/BM+T | Testis/BM+T | Sum Reads     | % miRNA     |
|-------|--------------|--------------------|-----------------|---------|-------------|---------------|-------------|
| chrX  | dme-mir-975  | 33                 | 7469            | 0.00440 | 0.99560     | <b>7502</b>   | 0.231905256 |
| chr2R | dme-mir-310  | 55                 | 11746           | 0.00466 | 0.99534     | <b>11801</b>  | 0.36479791  |
| chr2R | dme-mir-311  | 68                 | 12537           | 0.00539 | 0.99461     | <b>12605</b>  | 0.389651525 |
| chr2L | dme-mir-959  | 478                | 60382           | 0.00785 | 0.99215     | <b>60860</b>  | 1.881332152 |
| chrX  | dme-mir-978  | 241                | 29600           | 0.00808 | 0.99192     | <b>29841</b>  | 0.922443182 |
| chrX  | dme-mir-979  | 21                 | 1740            | 0.01193 | 0.98807     | <b>1761</b>   | 0.054421381 |
| chr2L | dme-mir-964  | 437                | 35403           | 0.01219 | 0.98781     | <b>35840</b>  | 1.107887009 |
| chrX  | dme-mir-976  | 380                | 26338           | 0.01422 | 0.98578     | <b>26718</b>  | 0.825903573 |
| chr2R | dme-mir-312  | 95                 | 5964            | 0.01568 | 0.98432     | <b>6059</b>   | 0.187298577 |
| chr3R | dme-mir-92b  | 42                 | 2615            | 0.01581 | 0.98419     | <b>2657</b>   | 0.082118942 |
| chrX  | dme-mir-972  | 61                 | 3364            | 0.01781 | 0.98219     | <b>3425</b>   | 0.105859709 |
| chrX  | dme-mir-977  | 680                | 28350           | 0.02342 | 0.97658     | <b>29030</b>  | 0.897388622 |
| chrX  | dme-mir-983  | 724                | 23562           | 0.02981 | 0.97019     | <b>24286</b>  | 0.750739922 |
| chr2R | dme-mir-992  | 45                 | 1383            | 0.03152 | 0.96848     | <b>1428</b>   | 0.044127532 |
| chrX  | dme-mir-971  | 4                  | 116             | 0.03347 | 0.96653     | <b>120</b>    | 0.003694039 |
| chr2R | dme-mir-988  | 876                | 23055           | 0.03661 | 0.96339     | <b>23931</b>  | 0.739750538 |
| chr2R | dme-mir-313  | 59                 | 1295            | 0.04357 | 0.95643     | <b>1354</b>   | 0.041855466 |
| chr3R | dme-mir-92a  | 254                | 4984            | 0.04849 | 0.95151     | <b>5238</b>   | 0.161919445 |
| chr3R | dme-mir-318  | 4                  | 70              | 0.05405 | 0.94595     | <b>74</b>     | 0.002287522 |
| chr3R | dme-mir-994  | 4                  | 67              | 0.05674 | 0.94326     | <b>71</b>     | 0.002179328 |
| chr2R | dme-mir-3    | 2                  | 28              | 0.06667 | 0.93333     | <b>30</b>     | 0.000927374 |
| chrX  | dme-mir-984  | 551                | 7704            | 0.06675 | 0.93325     | <b>8255</b>   | 0.255166864 |
| chr2L | dme-mir-1004 | 44                 | 504             | 0.08029 | 0.91971     | <b>548</b>    | 0.016940025 |
| chr2L | dme-mir-960  | 1717               | 19026           | 0.08277 | 0.91723     | <b>20743</b>  | 0.641217054 |
| chr3R | dme-mir-1011 | 1                  | 11              | 0.08696 | 0.91304     | <b>12</b>     | 0.000355493 |
| chrX  | dme-mir-12   | 21306              | 217798          | 0.08911 | 0.91089     | <b>239104</b> | 7.391291592 |
| chr2L | dme-mir-961  | 177                | 1670            | 0.09586 | 0.90414     | <b>1847</b>   | 0.057079847 |

|       |              |       |       |         |         |              |             |
|-------|--------------|-------|-------|---------|---------|--------------|-------------|
| chr2L | dme-mir-963  | 368   | 3241  | 0.10197 | 0.89803 | <b>3609</b>  | 0.111563048 |
| chr3L | dme-mir-274  | 3593  | 27748 | 0.11464 | 0.88536 | <b>31341</b> | 0.968827221 |
| chr3R | dme-mir-317  | 2370  | 15712 | 0.13107 | 0.86893 | <b>18082</b> | 0.558943528 |
| chr2L | dme-mir-9b   | 4263  | 23545 | 0.15330 | 0.84670 | <b>27808</b> | 0.859598032 |
| chrX  | dme-mir-985  | 214   | 1124  | 0.16000 | 0.84000 | <b>1338</b>  | 0.041345405 |
| chr2L | dme-mir-305  | 13965 | 65041 | 0.17676 | 0.82324 | <b>79006</b> | 2.442253734 |
| chr4  | dme-mir-954  | 50    | 217   | 0.18727 | 0.81273 | <b>267</b>   | 0.008253625 |
| chr3R | dme-mir-34   | 9383  | 40124 | 0.18953 | 0.81047 | <b>49507</b> | 1.530382746 |
| chr2L | dme-mir-966  | 5     | 21    | 0.19231 | 0.80769 | <b>26</b>    | 0.000803724 |
| chr2L | dme-mir-962  | 401   | 1649  | 0.19566 | 0.80434 | <b>2050</b>  | 0.063355069 |
| chr2R | dme-mir-991  | 120   | 445   | 0.21258 | 0.78742 | <b>565</b>   | 0.017450079 |
| chr3R | dme-mir-1013 | 52    | 189   | 0.21577 | 0.78423 | <b>241</b>   | 0.007449901 |
| chrX  | dme-mir-982  | 118   | 420   | 0.21933 | 0.78067 | <b>538</b>   | 0.016630899 |
| chr2L | dme-mir-306  | 1152  | 3329  | 0.25711 | 0.74289 | <b>4481</b>  | 0.13850323  |
| chr3L | dme-mir-316  | 5546  | 15460 | 0.26403 | 0.73597 | <b>21006</b> | 0.649331456 |
| chrX  | dme-mir-303  | 142   | 396   | 0.26419 | 0.73581 | <b>538</b>   | 0.016615442 |
| chr3R | dme-mir-2c   | 27    | 67    | 0.28877 | 0.71123 | <b>94</b>    | 0.002890314 |
| chrX  | dme-mir-973  | 76    | 179   | 0.29862 | 0.70138 | <b>255</b>   | 0.007867218 |
| chr3R | dme-mir-11   | 14438 | 32372 | 0.30844 | 0.69156 | <b>46810</b> | 1.446996236 |
| chr2L | dme-mir-125  | 5238  | 11659 | 0.31000 | 0.69000 | <b>16897</b> | 0.522312177 |
| chrX  | dme-mir-283  | 577   | 1257  | 0.31470 | 0.68530 | <b>1834</b>  | 0.056677973 |
| chr2L | dme-mir-2a-1 | 21    | 46    | 0.31579 | 0.68421 | <b>67</b>    | 0.002055678 |
| chr3L | dme-mir-193  | 12    | 25    | 0.32877 | 0.67123 | <b>37</b>    | 0.001128304 |

At least 10 normalized reads in the summed normalized reads were required. A ratio (BodyM/BodyM+Testis)  $\geq 0.66$  is male body biased. A ratio (Testis/Body M+Testis)  $\geq 0.66$  is testis biased. BM: Body Male; T: testis

**TABLE S8: Adult Female Body vs. Ovary biased miRNAs**

**Female Body (female somatic tissues) biased:**

| chrom | miRNA           | Female Body reads | Ovary reads | BF/BF+Ov | BF/BF+Ov | Sum Reads     | % miRNA     |
|-------|-----------------|-------------------|-------------|----------|----------|---------------|-------------|
| chr3R | dme-mir-1000    | 206               | 0           | 1        | 0        | <b>206</b>    | 0.016796842 |
| chr3R | dme-mir-1001    | 29                | 0           | 1        | 0        | <b>29</b>     | 0.002364604 |
| chr2L | dme-mir-1004    | 13                | 0           | 1        | 0        | <b>13</b>     | 0.001059995 |
| chr3R | dme-mir-1014    | 66                | 0           | 1        | 0        | <b>66</b>     | 0.005381513 |
| chr3R | dme-mir-1015    | 15                | 0           | 1        | 0        | <b>15</b>     | 0.001223071 |
| chr2R | dme-mir-137     | 80                | 0           | 1        | 0        | <b>80</b>     | 0.006523046 |
| chrX  | dme-mir-210     | 121               | 0           | 1        | 0        | <b>121</b>    | 0.009866106 |
| chr3L | dme-mir-219     | 21                | 0           | 1        | 0        | <b>21</b>     | 0.001712299 |
| chr3L | dme-mir-263b    | 263               | 0           | 1        | 0        | <b>263</b>    | 0.021444512 |
| chr3L | dme-mir-276b    | 112               | 0           | 1        | 0        | <b>112</b>    | 0.009132264 |
| chr2L | dme-mir-375     | 811               | 0           | 1        | 0        | <b>811</b>    | 0.066127374 |
| chr3L | dme-mir-957     | 307               | 0           | 1        | 0        | <b>307</b>    | 0.025032187 |
| chr3L | dme-mir-958     | 2103              | 0           | 1        | 0        | <b>2103</b>   | 0.171474559 |
| chrX  | dme-mir-981     | 19                | 0           | 1        | 0        | <b>19</b>     | 0.001549223 |
| chr2R | dme-mir-987     | 308               | 0           | 1        | 0        | <b>308</b>    | 0.025113725 |
| chr3R | dme-mir-993     | 314               | 0           | 1        | 0        | <b>314</b>    | 0.025602954 |
| chr3R | dme-mir-iab-4as | 28                | 0           | 1        | 0        | <b>28</b>     | 0.002283066 |
| chr2L | dme-mir-124     | 470               | 2           | 0.99590  | 0.00410  | <b>472</b>    | 0.038480513 |
| chr2L | dme-mir-133     | 300               | 2           | 0.99360  | 0.00640  | <b>302</b>    | 0.024619041 |
| chr3L | dme-mir-314     | 4449              | 31          | 0.99310  | 0.00690  | <b>4480</b>   | 0.365284793 |
| chr3L | dme-mir-274     | 1179              | 10          | 0.99187  | 0.00813  | <b>1189</b>   | 0.096921485 |
| chr3R | dme-mir-277     | 19989             | 168         | 0.99166  | 0.00834  | <b>20157</b>  | 1.643577423 |
| chr3L | dme-mir-9a      | 8813              | 77          | 0.99130  | 0.00870  | <b>8890</b>   | 0.724899812 |
| chr3L | dme-mir-956     | 1393              | 17          | 0.98766  | 0.01234  | <b>1410</b>   | 0.115001112 |
| chr3R | dme-mir-10      | 6256              | 79          | 0.98749  | 0.01251  | <b>6335</b>   | 0.51656459  |
| chr2L | dme-mir-1       | 199357            | 2994        | 0.98520  | 0.01480  | <b>202351</b> | 16.4993386  |
| chr3R | dme-mir-929     | 819               | 23          | 0.97246  | 0.02754  | <b>842</b>    | 0.068671122 |
| chr3R | dme-mir-252     | 1420              | 41          | 0.97221  | 0.02779  | <b>1461</b>   | 0.119094084 |
| chr3R | dme-mir-13a     | 202               | 10          | 0.95434  | 0.04566  | <b>212</b>    | 0.017258791 |
| chr2R | dme-mir-1008    | 36                | 2           | 0.94904  | 0.05096  | <b>38</b>     | 0.003092991 |
| chr2L | dme-mir-932     | 70                | 4           | 0.94766  | 0.05234  | <b>74</b>     | 0.006022905 |
| chr3R | dme-mir-iab-4   | 35                | 2           | 0.94766  | 0.05234  | <b>37</b>     | 0.003011453 |
| chr3L | dme-mir-276     | 37412             | 2525        | 0.93678  | 0.06322  | <b>39937</b>  | 3.256354306 |
| chr3L | dme-mir-955     | 26                | 2           | 0.93080  | 0.06920  | <b>28</b>     | 0.00227761  |
| chr2L | dme-mir-1006    | 101               | 8           | 0.92889  | 0.07111  | <b>109</b>    | 0.008865826 |
| chr3R | dme-mir-1013    | 24                | 2           | 0.92546  | 0.07454  | <b>26</b>     | 0.002114534 |
| chr3L | dme-mir-276a    | 31855             | 2710        | 0.92159  | 0.07841  | <b>34565</b>  | 2.818378803 |
| chr2R | dme-mir-278     | 2040              | 226         | 0.90020  | 0.09980  | <b>2266</b>   | 0.184779232 |
| chrX  | dme-mir-980     | 908               | 106         | 0.89518  | 0.10482  | <b>1014</b>   | 0.082705681 |
| chr2R | dme-mir-31a     | 11038             | 1703        | 0.86633  | 0.13367  | <b>12741</b>  | 1.038880662 |
| chr3R | dme-mir-1010    | 92                | 15          | 0.85610  | 0.14390  | <b>107</b>    | 0.008762464 |
| chr3R | dme-mir-999     | 771               | 141         | 0.84529  | 0.15471  | <b>912</b>    | 0.074372131 |
| chr2R | dme-mir-281-1   | 5351              | 1009        | 0.84134  | 0.15866  | <b>6360</b>   | 0.518587988 |
| chr3R | dme-mir-2c      | 10                | 2           | 0.83801  | 0.16199  | <b>12</b>     | 0.000973001 |



|       |               |        |       |         |         |               |             |
|-------|---------------|--------|-------|---------|---------|---------------|-------------|
| chr2R | dme-mir-281-2 | 1730   | 340   | 0.83566 | 0.16434 | <b>2070</b>   | 0.168802027 |
| chr2L | dme-mir-100   | 366    | 73    | 0.83285 | 0.16715 | <b>439</b>    | 0.035832503 |
| chr3L | dme-mir-190   | 169    | 35    | 0.82926 | 0.17074 | <b>204</b>    | 0.016617099 |
| chr2L | dme-mir-87    | 535    | 110   | 0.82922 | 0.17078 | <b>645</b>    | 0.052607222 |
| chr2L | dme-let-7     | 8023   | 1722  | 0.82326 | 0.17674 | <b>9745</b>   | 0.794619587 |
| chr2R | dme-mir-8     | 191101 | 44755 | 0.81024 | 0.18976 | <b>235856</b> | 19.23123099 |
| chr2L | dme-mir-125   | 1718   | 485   | 0.77977 | 0.22023 | <b>2203</b>   | 0.17964509  |
| chr3R | dme-mir-279   | 4143   | 1208  | 0.77422 | 0.22578 | <b>5351</b>   | 0.436324888 |
| chr3L | dme-mir-316   | 1713   | 644   | 0.72686 | 0.27314 | <b>2357</b>   | 0.192162262 |
| chr3R | dme-mir-284   | 116    | 44    | 0.72292 | 0.27708 | <b>160</b>    | 0.013083682 |

#### Ovary enriched miRNAs:

| chrom | miRNA         | Female Body reads | Ovary reads | BF/BF+Ov | Ov/BF+Ov | Sum Reads     | % miRNA     |
|-------|---------------|-------------------|-------------|----------|----------|---------------|-------------|
| chr3R | dme-mir-318   | 76                | 34886       | 0.00217  | 0.99783  | <b>34962</b>  | 2.850769902 |
| chrX  | dme-mir-984   | 7                 | 1378        | 0.00505  | 0.99495  | <b>1385</b>   | 0.112954019 |
| chr3R | dme-mir-994   | 76                | 14463       | 0.00523  | 0.99477  | <b>14539</b>  | 1.185511752 |
| chr2R | dme-mir-313   | 8                 | 1216        | 0.00654  | 0.99346  | <b>1224</b>   | 0.099795454 |
| chrX  | dme-mir-303   | 1                 | 128         | 0.00778  | 0.99222  | <b>129</b>    | 0.010484476 |
| chrX  | dme-mir-983   | 7                 | 798         | 0.00869  | 0.99131  | <b>805</b>    | 0.065667938 |
| chr2R | dme-mir-312   | 40                | 2803        | 0.01407  | 0.98593  | <b>2843</b>   | 0.231810914 |
| chr2R | dme-mir-1009  | 3                 | 174         | 0.01695  | 0.98305  | <b>177</b>    | 0.014430438 |
| chr2R | dme-mir-311   | 13                | 460         | 0.02748  | 0.97252  | <b>473</b>    | 0.038573619 |
| chrX  | dme-mir-982   | 3                 | 89          | 0.03264  | 0.96736  | <b>92</b>     | 0.007495147 |
| chr2R | dme-mir-310   | 9                 | 228         | 0.03796  | 0.96204  | <b>237</b>    | 0.019333034 |
| chr2L | dme-mir-275   | 763               | 12586       | 0.05716  | 0.94284  | <b>13349</b>  | 1.088479123 |
| chr3R | dme-mir-92b   | 68                | 990         | 0.06429  | 0.93571  | <b>1058</b>   | 0.086246167 |
| chr3R | dme-mir-92a   | 169               | 1514        | 0.10044  | 0.89956  | <b>1683</b>   | 0.137196605 |
| chr3R | dme-mir-995   | 459               | 3679        | 0.11093  | 0.88907  | <b>4138</b>   | 0.337377347 |
| chr2L | dme-mir-966   | 6                 | 41          | 0.12877  | 0.87123  | <b>47</b>     | 0.003799254 |
| chr2R | dme-mir-989   | 13128             | 88414       | 0.12929  | 0.87071  | <b>101542</b> | 8.279510048 |
| chr2L | dme-mir-9b    | 1608              | 10570       | 0.13204  | 0.86796  | <b>12178</b>  | 0.99298085  |
| chr2L | dme-mir-2a-1  | 22                | 118         | 0.15723  | 0.84277  | <b>140</b>    | 0.011408674 |
| chr2L | dme-mir-306   | 499               | 1954        | 0.20340  | 0.79660  | <b>2453</b>   | 0.200041589 |
| chr2R | dme-mir-184   | 7879              | 30821       | 0.20359  | 0.79641  | <b>38700</b>  | 3.155536026 |
| chr4  | dme-mir-954   | 11                | 43          | 0.20550  | 0.79450  | <b>54</b>     | 0.004364565 |
| chr3R | dme-mir-996   | 8051              | 28482       | 0.22038  | 0.77962  | <b>36533</b>  | 2.978840048 |
| chrX  | dme-mir-13b-2 | 55                | 172         | 0.24224  | 0.75776  | <b>227</b>    | 0.018512798 |
| chr2L | dme-mir-79    | 2196              | 6723        | 0.24621  | 0.75379  | <b>8919</b>   | 0.727260898 |
| chr2L | dme-mir-2b-2  | 319               | 862         | 0.27007  | 0.72993  | <b>1181</b>   | 0.096309284 |
| chr2L | dme-mir-959   | 3                 | 8           | 0.27953  | 0.72047  | <b>11</b>     | 0.000875095 |
| chr2R | dme-mir-7     | 928               | 2356        | 0.28254  | 0.71746  | <b>3284</b>   | 0.267806437 |
| chr3L | dme-mir-33    | 1974              | 4025        | 0.32907  | 0.67093  | <b>5999</b>   | 0.48912155  |
| chr3R | dme-mir-34    | 3245              | 6344        | 0.33839  | 0.66161  | <b>9589</b>   | 0.781900759 |

At least 10 normalized reads in summed normalized reads were required. A ratio (BodyF/BodyF+Ovary)  $\geq 0.66$  is female body biased and a ratio (Ovary/Body M+Ovary)  $\geq 0.66$  is ovary biased. BF: Body Female; Ov: Ovary.

TABLE S9: Raw Counts miRNA-Seq

| Chrom    | miRNA           | Late Embryo Lymphoid Cells |        | L3 Larvae Salivary Glands |             | Adult Head |        | Adult Body |        | Adult Gonads |       |
|----------|-----------------|----------------------------|--------|---------------------------|-------------|------------|--------|------------|--------|--------------|-------|
|          |                 | S2 (M)                     | Kc (F) | S. Glands M               | S. Glands F | Head M     | Head F | Body M     | Body F | Testis       | Ovary |
| chr3L    | dme-bantam      | 35460                      | 18240  | 12348                     | 24423       | 103920     | 152727 | 244113     | 72941  | 28463        | 687   |
| chr2L    | dme-let-7       | 5                          | 5      | 30                        | 219         | 20606      | 51163  | 28931      | 8023   | 891          | 11559 |
| chr2L    | dme-let-7-as    | 0                          | 0      | 0                         | 0           | 0          | 0      | 0          | 0      | 0            | 0     |
| chr2L    | dme-mir-1       | 23                         | 55     | 679                       | 1503        | 126814     | 175008 | 496888     | 199357 | 1549         | 241   |
| chr3R    | dme-mir-10      | 1                          | 18     | 199                       | 395         | 3730       | 4794   | 19132      | 6256   | 41           | 171   |
| chr2L    | dme-mir-100     | 0                          | 0      | 1                         | 10          | 1004       | 1527   | 1103       | 366    | 38           | 226   |
| chr3R    | dme-mir-1000    | 1                          | 867    | 13                        | 27          | 18668      | 25776  | 875        | 206    | 0            | 1     |
| chr3R    | dme-mir-1001    | 0                          | 0      | 0                         | 0           | 162        | 208    | 106        | 29     | 0            | 2     |
| chr2L    | dme-mir-1002    | 0                          | 0      | 0                         | 0           | 0          | 0      | 0          | 0      | 0            | 0     |
| chr3R    | dme-mir-1003    | 1487                       | 902    | 34                        | 30          | 107        | 228    | 124        | 34     | 16           | 63    |
| chr2L    | dme-mir-1004    | 0                          | 0      | 0                         | 1           | 157        | 253    | 44         | 13     | 0            | 144   |
| chr2L    | dme-mir-1004-as | 0                          | 0      | 0                         | 0           | 1          | 0      | 0          | 0      | 0            | 0     |
| chr2L    | dme-mir-1005    | 1                          | 0      | 16                        | 11          | 101        | 332    | 122        | 44     | 14           | 3     |
| chr2L    | dme-mir-1006    | 58                         | 97     | 71                        | 107         | 315        | 519    | 415        | 101    | 4            | 15    |
| chr2L    | dme-mir-1006-as | 0                          | 0      | 0                         | 0           | 0          | 0      | 0          | 0      | 0            | 0     |
| chrX     | dme-mir-1007    | 13                         | 5      | 0                         | 4           | 109        | 125    | 47         | 19     | 10           | 6     |
| chr2R    | dme-mir-1008    | 94                         | 175    | 8                         | 9           | 119        | 104    | 106        | 36     | 1            | 11    |
| chr2R    | dme-mir-1009    | 4                          | 6      | 5                         | 2           | 30         | 85     | 38         | 3      | 90           | 5     |
| chr3R    | dme-mir-1010    | 1                          | 71     | 1                         | 0           | 851        | 1677   | 319        | 92     | 8            | 168   |
| chr3R    | dme-mir-1011    | 0                          | 0      | 0                         | 0           | 8          | 19     | 1          | 0      | 0            | 3     |
| chr3R    | dme-mir-1012    | 164                        | 42     | 230                       | 346         | 374        | 623    | 215        | 79     | 40           | 46    |
| chr3R    | dme-mir-1013    | 1                          | 4      | 3                         | 4           | 90         | 131    | 52         | 24     | 1            | 54    |
| chr3R    | dme-mir-1014    | 0                          | 0      | 0                         | 0           | 0          | 0      | 248        | 66     | 0            | 0     |
| chr3R    | dme-mir-1015    | 0                          | 0      | 0                         | 0           | 0          | 1      | 62         | 15     | 0            | 2     |
| chr2R    | dme-mir-1016    | 5                          | 4      | 3                         | 4           | 35         | 76     | 18         | 8      | 0            | 6     |
| chr3R    | dme-mir-1017    | 0                          | 0      | 0                         | 0           | 183        | 278    | 25         | 6      | 0            | 1     |
| chr3R    | dme-mir-11      | 15690                      | 9328   | 5007                      | 12439       | 6209       | 21450  | 14438      | 5606   | 3338         | 9249  |
| chrX     | dme-mir-12      | 415                        | 7053   | 16391                     | 43021       | 1117       | 2682   | 21306      | 2801   | 2280         | 62228 |
| chr2L    | dme-mir-124     | 8                          | 63     | 10                        | 16          | 29849      | 48896  | 2863       | 470    | 1            | 151   |
| chr2L    | dme-mir-124-as  | 0                          | 0      | 0                         | 0           | 0          | 0      | 0          | 0      | 0            | 0     |
| chr2L    | dme-mir-125     | 10                         | 3      | 23                        | 63          | 7175       | 20670  | 5238       | 1718   | 251          | 3331  |
| chrX     | dme-mir-12-as   | 0                          | 0      | 0                         | 0           | 0          | 0      | 0          | 0      | 0            | 0     |
| chr2L    | dme-mir-133     | 5                          | 3      | 6                         | 4           | 4836       | 16473  | 1065       | 300    | 1            | 38    |
| chr2R    | dme-mir-137     | 0                          | 2      | 0                         | 1           | 701        | 1301   | 341        | 80     | 0            | 38    |
| chr3R    | dme-mir-13a     | 25                         | 57     | 11                        | 17          | 5608       | 9074   | 797        | 202    | 5            | 29    |
| chr3R    | dme-mir-13b     | 11557                      | 9820   | 5207                      | 12399       | 27953      | 34823  | 21017      | 7131   | 5476         | 5212  |
| chr3R    | dme-mir-13b-1   | 0                          | 0      | 7                         | 9           | 14         | 22     | 4          | 1      | 0            | 0     |
| chrX     | dme-mir-13b-2   | 299                        | 300    | 62                        | 70          | 27         | 101    | 92         | 55     | 89           | 1     |
| chr2R    | dme-mir-14      | 182756                     | 130160 | 2602                      | 2658        | 31243      | 68581  | 26146      | 5504   | 1571         | 6722  |
| chr2R    | dme-mir-14-as   | 0                          | 0      | 0                         | 0           | 2          | 1      | 0          | 0      | 0            | 0     |
| chr2R    | dme-mir-184     | 54062                      | 73256  | 810                       | 1085        | 51441      | 89330  | 15336      | 7879   | 15944        | 540   |
| chr3L    | dme-mir-190     | 171                        | 308    | 130                       | 168         | 1250       | 634    | 162        | 169    | 18           | 13    |
| chr3L    | dme-mir-193     | 3                          | 64     | 0                         | 4           | 1978       | 4491   | 12         | 1      | 1            | 7     |
| chr2L    | dme-mir-1-as    | 0                          | 0      | 0                         | 0           | 0          | 0      | 0          | 0      | 0            | 0     |
| chrX     | dme-mir-210     | 1                          | 1      | 31                        | 29          | 30904      | 106957 | 409        | 121    | 0            | 10    |
| chr3L    | dme-mir-219     | 0                          | 0      | 1                         | 0           | 259        | 437    | 84         | 21     | 0            | 1     |
| chr2RHet | dme-mir-2279    | 8                          | 9      | 2                         | 5           | 7          | 16     | 12         | 3      | 0            | 3     |
| chr2RHet | dme-mir-2279-as | 0                          | 1      | 0                         | 1           | 0          | 0      | 0          | 0      | 0            | 0     |
| chr2L    | dme-mir-2280    | 0                          | 0      | 0                         | 0           | 0          | 0      | 1          | 0      | 0            | 0     |
| chr3R    | dme-mir-2281    | 0                          | 0      | 0                         | 0           | 0          | 1      | 4          | 1      | 0            | 0     |
| chr3L    | dme-mir-2282    | 1                          | 3      | 0                         | 0           | 0          | 0      | 0          | 0      | 0            | 0     |
| chr3R    | dme-mir-2283    | 0                          | 0      | 0                         | 0           | 3          | 3      | 4          | 0      | 0            | 1     |
| chr3R    | dme-mir-252     | 13294                      | 137    | 831                       | 644         | 14416      | 37717  | 4036       | 1420   | 21           | 990   |
| chr2L    | dme-mir-263a    | 66                         | 3      | 27399                     | 39275       | 17316      | 25950  | 11829      | 3892   | 3639         | 245   |
| chr2L    | dme-mir-263a-as | 0                          | 0      | 0                         | 0           | 0          | 0      | 0          | 0      | 0            | 0     |
| chr3L    | dme-mir-263b    | 1                          | 2      | 2                         | 6           | 3141       | 6005   | 1144       | 263    | 0            | 13    |
| chr3L    | dme-mir-274     | 1                          | 0      | 12                        | 16          | 13878      | 55708  | 3593       | 1179   | 5            | 7928  |
| chr2L    | dme-mir-275     | 461                        | 832    | 13608                     | 2588        | 668        | 2503   | 1122       | 763    | 6511         | 605   |
| chr2L    | dme-mir-275-as  | 0                          | 0      | 0                         | 1           | 1          | 1      | 0          | 0      | 0            | 0     |
| chr3L    | dme-mir-276     | 4524                       | 10288  | 1946                      | 5840        | 68388      | 58112  | 47955      | 37412  | 1306         | 123   |
| chr3L    | dme-mir-276a    | 9143                       | 7257   | 1158                      | 3728        | 73713      | 163232 | 90583      | 31855  | 1402         | 2248  |
| chr3L    | dme-mir-276b    | 5                          | 125    | 1                         | 8           | 7324       | 16746  | 530        | 112    | 0            | 3     |
| chr3R    | dme-mir-277     | 3703                       | 1688   | 807                       | 1660        | 59156      | 104947 | 76053      | 19989  | 87           | 9542  |
| chr2R    | dme-mir-278     | 47                         | 1099   | 797                       | 526         | 2829       | 9122   | 4966       | 2040   | 117          | 2426  |
| chr3R    | dme-mir-279     | 16526                      | 10095  | 321                       | 1492        | 8345       | 13021  | 14571      | 4143   | 625          | 1554  |
| chr3R    | dme-mir-279-as  | 0                          | 0      | 0                         | 0           | 0          | 0      | 0          | 0      | 0            | 0     |
| chr2R    | dme-mir-281-1   | 179                        | 132    | 55                        | 118         | 260        | 557    | 17602      | 5351   | 522          | 143   |
| chr2R    | dme-mir-281-2   | 34                         | 23     | 53                        | 84          | 277        | 439    | 5100       | 1730   | 176          | 21    |
| chr3L    | dme-mir-282     | 13543                      | 3084   | 4147                      | 31936       | 6842       | 6760   | 23325      | 12554  | 3427         | 11072 |
| chr3L    | dme-mir-282-as  | 0                          | 0      | 0                         | 0           | 0          | 0      | 0          | 0      | 0            | 0     |
| chrX     | dme-mir-283     | 48                         | 930    | 4683                      | 7791        | 370        | 448    | 577        | 363    | 133          | 359   |
| chr3R    | dme-mir-284     | 0                          | 5      | 2                         | 1           | 518        | 2009   | 523        | 116    | 23           | 16    |
| chr3L    | dme-mir-285     | 0                          | 0      | 12                        | 38          | 40821      | 63213  | 76         | 4      | 0            | 0     |
| chr2R    | dme-mir-286     | 43                         | 14     | 23                        | 31          | 4          | 15     | 5          | 1      | 0            | 0     |
| chr2L    | dme-mir-287     | 0                          | 0      | 0                         | 0           | 0          | 0      | 0          | 1      | 0            | 0     |
| chr3L    | dme-mir-289     | 0                          | 0      | 0                         | 0           | 0          | 0      | 0          | 1      | 0            | 0     |
| chr2L    | dme-mir-2a      | 7839                       | 19872  | 7976                      | 9677        | 40963      | 62518  | 42678      | 21855  | 19231        | 14216 |
| chr2L    | dme-mir-2a-1    | 173                        | 259    | 16                        | 27          | 34         | 64     | 21         | 22     | 61           | 13    |
| chr2L    | dme-mir-2a-2    | 2015                       | 6472   | 112                       | 164         | 1780       | 4486   | 1047       | 363    | 339          | 112   |
| chr2L    | dme-mir-2b      | 9981                       | 13905  | 6378                      | 7854        | 43346      | 58488  | 18220      | 8986   | 8217         | 6058  |
| chr2L    | dme-mir-2b-1    | 498                        | 138    | 461                       | 465         | 1684       | 1927   | 623        | 328    | 188          | 2     |
| chr2L    | dme-mir-2b-2    | 431                        | 1100   | 189                       | 177         | 714        | 1184   | 615        | 319    | 446          | 40    |
| chr3R    | dme-mir-2c      | 9                          | 13     | 3                         | 0           | 163        | 287    | 27         | 10     | 1            | 19    |
| chr2R    | dme-mir-3       | 15                         | 8      | 1                         | 1           | 3          | 5      | 2          | 1      | 3            | 8     |
| chrX     | dme-mir-303     | 7                          | 8      | 0                         | 0           | 1          | 3      | 142        | 1      | 66           | 113   |
| chrX     | dme-mir-304     | 34                         | 841    | 15014                     | 30430       | 1286       | 2492   | 17186      | 2108   | 743          | 556   |
| chrX     | dme-mir-304-as  | 0                          | 0      | 0                         | 0           | 0          | 0      | 0          | 0      | 0            | 0     |
| chr2L    | dme-mir-305     | 3321                       | 6880   | 7165                      | 9763        | 11336      | 20428  | 13965      | 3692   | 2694         | 18583 |
| chr2L    | dme-mir-305-as  | 0                          | 3      | 2                         | 7           | 12         | 8      | 0          | 1      | 1            | 0     |
| chr2L    | dme-mir-306     | 2500                       | 4089   | 1067                      | 1144        | 752        | 2067   | 1152       | 499    | 1011         | 951   |
| chr2R    | dme-mir-307     | 932                        | 22     | 1                         | 0           | 5587       | 15933  | 2063       | 482    | 245          | 42    |
| chr2R    | dme-mir-307-as  | 1                          | 0      | 5                         | 17          | 0          | 3      | 6          | 1      | 0            | 0     |

|       |                 |       |       |       |        |        |        |        |        |       |       |
|-------|-----------------|-------|-------|-------|--------|--------|--------|--------|--------|-------|-------|
| chr2R | dme-mir-308     | 1483  | 1685  | 2781  | 5046   | 1048   | 1674   | 1864   | 684    | 323   | 30    |
| chr2R | dme-mir-309     | 4     | 3     | 1     | 0      | 0      | 1      | 0      | 0      | 0     | 0     |
| chr2R | dme-mir-310     | 8     | 4     | 1     | 0      | 2      | 2      | 55     | 9      | 118   | 3356  |
| chr2R | dme-mir-311     | 8     | 2     | 0     | 0      | 1      | 2      | 68     | 13     | 238   | 3582  |
| chr2R | dme-mir-312     | 3     | 6     | 0     | 0      | 8      | 9      | 95     | 40     | 1450  | 1704  |
| chr2R | dme-mir-313     | 2     | 2     | 0     | 0      | 4      | 4      | 59     | 8      | 629   | 370   |
| chr3L | dme-mir-314     | 0     | 2     | 2     | 3      | 18     | 72     | 11627  | 4449   | 16    | 29    |
| chr3L | dme-mir-314-as  | 0     | 0     | 0     | 0      | 0      | 0      | 0      | 1      | 0     | 0     |
| chr3L | dme-mir-315     | 0     | 0     | 0     | 0      | 1204   | 2424   | 24     | 7      | 0     | 12    |
| chr3L | dme-mir-316     | 0     | 0     | 8     | 14     | 1119   | 3236   | 5546   | 1713   | 333   | 4417  |
| chr3L | dme-mir-316-as  | 0     | 0     | 0     | 0      | 0      | 0      | 1      | 0      | 0     | 0     |
| chr3R | dme-mir-317     | 9157  | 14069 | 718   | 1536   | 8974   | 14533  | 2370   | 561    | 529   | 4489  |
| chr3R | dme-mir-317-as  | 0     | 0     | 0     | 0      | 0      | 0      | 0      | 1      | 0     | 0     |
| chr3R | dme-mir-318     | 13    | 60    | 0     | 1      | 1      | 6      | 4      | 76     | 18047 | 20    |
| chr2R | dme-mir-31a     | 5     | 12    | 521   | 763    | 11606  | 22138  | 24842  | 11038  | 881   | 1134  |
| chrX  | dme-mir-31b     | 3     | 3     | 0     | 0      | 7      | 44     | 2068   | 447    | 170   | 875   |
| chr3L | dme-mir-33      | 1927  | 2696  | 1239  | 2256   | 1864   | 3555   | 9633   | 1974   | 2082  | 166   |
| chr3R | dme-mir-34      | 13980 | 15190 | 1643  | 2983   | 45375  | 77345  | 9383   | 3245   | 3282  | 11464 |
| chr2L | dme-mir-375     | 1     | 0     | 18745 | 34030  | 57     | 182    | 4698   | 811    | 0     | 1491  |
| chr2R | dme-mir-4       | 6     | 2     | 1     | 6      | 3      | 5      | 2      | 0      | 0     | 0     |
| chr2R | dme-mir-5       | 14    | 9     | 18    | 26     | 7      | 22     | 14     | 4      | 4     | 0     |
| chr2R | dme-mir-6-1     | 7     | 1     | 0     | 0      | 0      | 0      | 0      | 0      | 0     | 0     |
| chr2R | dme-mir-6-2     | 1     | 1     | 0     | 0      | 0      | 0      | 0      | 0      | 0     | 0     |
| chr2R | dme-mir-6-3     | 2     | 1     | 0     | 0      | 0      | 0      | 0      | 0      | 0     | 0     |
| chr2R | dme-mir-6-3-as  | 0     | 0     | 0     | 0      | 0      | 0      | 0      | 0      | 0     | 0     |
| chr2R | dme-mir-7       | 332   | 243   | 176   | 270    | 13849  | 20729  | 3010   | 928    | 1219  | 863   |
| chr2L | dme-mir-79      | 2043  | 3617  | 1604  | 3518   | 7700   | 13318  | 12143  | 2196   | 3478  | 219   |
| chr2R | dme-mir-8       | 4003  | 18559 | 84972 | 180692 | 184826 | 244757 | 447346 | 191101 | 23152 | 56620 |
| chr2L | dme-mir-87      | 0     | 2     | 2     | 4      | 2344   | 4107   | 908    | 535    | 57    | 12    |
| chrX  | dme-mir-927     | 0     | 1     | 0     | 0      | 662    | 994    | 41     | 9      | 0     | 0     |
| chr3R | dme-mir-929     | 1     | 2     | 20    | 39     | 12012  | 13343  | 1810   | 819    | 12    | 4     |
| chr3R | dme-mir-929-as  | 0     | 0     | 0     | 0      | 0      | 0      | 2      | 0      | 0     | 0     |
| chr3R | dme-mir-92a     | 13    | 1478  | 2     | 7      | 1421   | 2484   | 254    | 169    | 783   | 1424  |
| chr3R | dme-mir-92a-as  | 0     | 0     | 0     | 0      | 0      | 0      | 0      | 0      | 0     | 0     |
| chr3R | dme-mir-92b     | 20    | 447   | 31    | 64     | 54     | 68     | 42     | 68     | 512   | 747   |
| chr2L | dme-mir-932     | 5     | 118   | 4     | 2      | 3614   | 8766   | 276    | 70     | 2     | 45    |
| chr4  | dme-mir-954     | 11    | 61    | 1     | 1      | 59     | 124    | 50     | 11     | 22    | 62    |
| chr3L | dme-mir-955     | 0     | 0     | 0     | 0      | 54     | 84     | 59     | 26     | 1     | 7     |
| chr3L | dme-mir-956     | 0     | 1     | 0     | 1      | 4      | 20     | 4342   | 1393   | 9     | 54    |
| chr3L | dme-mir-957     | 0     | 0     | 2     | 7      | 6154   | 12255  | 839    | 307    | 0     | 0     |
| chr3L | dme-mir-958     | 1     | 19    | 0     | 1      | 3      | 29     | 7379   | 2103   | 0     | 9     |
| chr2L | dme-mir-959     | 0     | 0     | 0     | 0      | 7      | 18     | 478    | 3      | 4     | 17252 |
| chr2L | dme-mir-960     | 0     | 1     | 0     | 2      | 30     | 103    | 1717   | 34     | 11    | 5436  |
| chr2L | dme-mir-961     | 0     | 0     | 0     | 0      | 5      | 20     | 177    | 5      | 5     | 477   |
| chr2L | dme-mir-962     | 0     | 0     | 1     | 0      | 28     | 55     | 401    | 39     | 33    | 471   |
| chr2L | dme-mir-963     | 0     | 1     | 0     | 0      | 5      | 20     | 368    | 6      | 1     | 926   |
| chr2L | dme-mir-964     | 0     | 0     | 0     | 0      | 7      | 41     | 437    | 10     | 5     | 10115 |
| chr2L | dme-mir-965     | 559   | 608   | 131   | 567    | 361    | 613    | 1129   | 201    | 145   | 9     |
| chr2L | dme-mir-966     | 15    | 39    | 1     | 4      | 8      | 12     | 5      | 6      | 21    | 6     |
| chr2L | dme-mir-967     | 10    | 7     | 0     | 1      | 4      | 2      | 3      | 0      | 0     | 0     |
| chr2L | dme-mir-967-as  | 0     | 0     | 0     | 0      | 0      | 0      | 0      | 1      | 0     | 0     |
| chr2L | dme-mir-968     | 0     | 0     | 0     | 0      | 2      | 3      | 0      | 0      | 0     | 0     |
| chrX  | dme-mir-969     | 0     | 0     | 0     | 2      | 194    | 192    | 27     | 6      | 0     | 0     |
| chrX  | dme-mir-970     | 1140  | 1185  | 177   | 198    | 1442   | 3119   | 656    | 205    | 59    | 100   |
| chrX  | dme-mir-971     | 0     | 35    | 0     | 1      | 40     | 70     | 4      | 0      | 0     | 33    |
| chrX  | dme-mir-972     | 0     | 0     | 0     | 0      | 0      | 1      | 61     | 0      | 0     | 961   |
| chrX  | dme-mir-973     | 0     | 8     | 0     | 0      | 0      | 0      | 76     | 1      | 0     | 51    |
| chrX  | dme-mir-974     | 0     | 2     | 0     | 0      | 5      | 2      | 236    | 1      | 0     | 82    |
| chrX  | dme-mir-975     | 0     | 3     | 0     | 0      | 0      | 0      | 33     | 0      | 0     | 2134  |
| chrX  | dme-mir-976     | 0     | 1     | 0     | 0      | 0      | 2      | 380    | 2      | 0     | 7525  |
| chrX  | dme-mir-977     | 1     | 44    | 0     | 0      | 3      | 4      | 680    | 0      | 0     | 8100  |
| chrX  | dme-mir-978     | 1     | 4     | 0     | 0      | 2      | 3      | 241    | 1      | 0     | 8457  |
| chrX  | dme-mir-979     | 0     | 0     | 0     | 0      | 0      | 0      | 21     | 0      | 0     | 497   |
| chrX  | dme-mir-980     | 1534  | 302   | 3     | 3      | 349    | 1464   | 2995   | 908    | 55    | 154   |
| chrX  | dme-mir-981     | 1     | 952   | 0     | 3      | 231    | 968    | 56     | 19     | 0     | 16    |
| chrX  | dme-mir-981-as  | 1     | 4     | 0     | 0      | 1      | 1      | 0      | 0      | 0     | 0     |
| chrX  | dme-mir-982     | 0     | 11    | 0     | 0      | 1      | 3      | 118    | 3      | 46    | 120   |
| chrX  | dme-mir-983     | 6     | 9     | 0     | 0      | 9      | 16     | 724    | 7      | 413   | 6732  |
| chrX  | dme-mir-983-1   | 0     | 0     | 0     | 0      | 0      | 0      | 1      | 0      | 2     | 1     |
| chrX  | dme-mir-984     | 25    | 68    | 0     | 0      | 10     | 11     | 551    | 7      | 713   | 2201  |
| chrX  | dme-mir-985     | 0     | 0     | 0     | 0      | 1      | 0      | 214    | 2      | 1     | 321   |
| chr2R | dme-mir-986     | 3     | 29    | 211   | 226    | 271    | 1006   | 1880   | 510    | 301   | 309   |
| chr2R | dme-mir-987     | 0     | 3     | 9     | 36     | 14710  | 16043  | 803    | 308    | 0     | 3     |
| chr2R | dme-mir-988     | 13800 | 15082 | 558   | 539    | 620    | 1460   | 876    | 280    | 214   | 6587  |
| chr2R | dme-mir-988-as  | 1     | 0     | 0     | 0      | 0      | 0      | 0      | 0      | 0     | 0     |
| chr2R | dme-mir-989     | 3     | 158   | 14    | 30     | 1      | 6      | 44     | 13128  | 45737 | 6     |
| chr2R | dme-mir-990     | 0     | 0     | 0     | 0      | 382    | 430    | 8      | 2      | 0     | 0     |
| chr2R | dme-mir-991     | 0     | 0     | 0     | 0      | 0      | 1      | 120    | 2      | 4     | 127   |
| chr2R | dme-mir-992     | 2     | 4     | 0     | 0      | 0      | 1      | 45     | 1      | 0     | 395   |
| chr3R | dme-mir-993     | 0     | 1     | 0     | 2      | 982    | 1433   | 1448   | 314    | 0     | 1     |
| chr3R | dme-mir-994     | 5     | 27    | 0     | 2      | 2      | 3      | 4      | 76     | 7482  | 19    |
| chr3R | dme-mir-995     | 3761  | 3754  | 1631  | 3220   | 2255   | 3287   | 909    | 459    | 1903  | 228   |
| chr3R | dme-mir-995-as  | 0     | 0     | 0     | 0      | 0      | 0      | 1      | 0      | 0     | 0     |
| chr3R | dme-mir-996     | 23117 | 10275 | 2982  | 6077   | 10447  | 27396  | 29997  | 8051   | 14734 | 348   |
| chr3R | dme-mir-997     | 0     | 0     | 0     | 0      | 0      | 0      | 184    | 0      | 0     | 59    |
| chr3R | dme-mir-998     | 3118  | 3965  | 2123  | 5021   | 4751   | 5610   | 1074   | 459    | 403   | 84    |
| chr3R | dme-mir-999     | 247   | 374   | 27    | 35     | 7193   | 10562  | 1464   | 771    | 73    | 673   |
| chr3L | dme-mir-9a      | 49    | 83    | 1540  | 2193   | 12061  | 32808  | 28787  | 8813   | 40    | 6846  |
| chr2L | dme-mir-9b      | 2463  | 7931  | 1257  | 1648   | 1557   | 3726   | 4263   | 1608   | 5468  | 6727  |
| chr2L | dme-mir-9c      | 1896  | 3769  | 737   | 920    | 2615   | 5475   | 5508   | 2430   | 2337  | 2050  |
| chr3R | dme-mir-iab-4   | 0     | 1     | 0     | 0      | 2      | 2      | 94     | 35     | 1     | 7     |
| chr3R | dme-mir-iab-4as | 0     | 0     | 0     | 0      | 0      | 1      | 144    | 28     | 0     | 16    |

S. Glands: Salivary Glands; M: Male; F: Female

**TABLE S10: Normalized read counts in libraries**

| Chrom    | miRNA           | S2     | Kc     | S. Glands M | S. Glands F | Head M | Head F | Body M | Body F | Testis | Ovary | SUM            |
|----------|-----------------|--------|--------|-------------|-------------|--------|--------|--------|--------|--------|-------|----------------|
| chr3L    | dme-bantam      | 35460  | 27334  | 19757       | 24423       | 181971 | 152727 | 244113 | 250083 | 2405   | 55022 | <b>993293</b>  |
| chr2L    | dme-let-7       | 5      | 7      | 48          | 219         | 36082  | 51163  | 28931  | 27507  | 40457  | 1722  | <b>186142</b>  |
| chr2L    | dme-let-7-as    | 0      | 0      | 0           | 0           | 0      | 0      | 0      | 0      | 0      | 0     | <b>0</b>       |
| chr2L    | dme-mir-1       | 23     | 82     | 1086        | 1503        | 222060 | 175008 | 496888 | 683509 | 844    | 2994  | <b>1583998</b> |
| chr2L    | dme-mir-1-as    | 0      | 0      | 0           | 0           | 0      | 0      | 0      | 0      | 0      | 0     | <b>0</b>       |
| chr3R    | dme-mir-10      | 1      | 27     | 318         | 395         | 6531   | 4794   | 19132  | 21449  | 599    | 79    | <b>53326</b>   |
| chr2L    | dme-mir-100     | 0      | 0      | 2           | 10          | 1758   | 1527   | 1103   | 1255   | 791    | 73    | <b>6519</b>    |
| chr3R    | dme-mir-1000    | 1      | 1299   | 21          | 27          | 32689  | 25776  | 875    | 706    | 4      | 0     | <b>61398</b>   |
| chr3R    | dme-mir-1001    | 0      | 0      | 0           | 0           | 284    | 208    | 106    | 99     | 7      | 0     | <b>704</b>     |
| chr2L    | dme-mir-1002    | 0      | 0      | 0           | 0           | 0      | 0      | 0      | 0      | 0      | 0     | <b>0</b>       |
| chr3R    | dme-mir-1003    | 1487   | 1352   | 54          | 30          | 187    | 228    | 124    | 117    | 221    | 31    | <b>3830</b>    |
| chr2L    | dme-mir-1004    | 0      | 0      | 0           | 1           | 275    | 253    | 44     | 45     | 504    | 0     | <b>1121</b>    |
| chr2L    | dme-mir-1004-as | 0      | 0      | 0           | 0           | 2      | 0      | 0      | 0      | 0      | 0     | <b>2</b>       |
| chr2L    | dme-mir-1005    | 1      | 0      | 26          | 11          | 177    | 332    | 122    | 151    | 11     | 27    | <b>857</b>     |
| chr2L    | dme-mir-1006    | 58     | 145    | 114         | 107         | 552    | 519    | 415    | 346    | 53     | 8     | <b>2316</b>    |
| chrX     | dme-mir-1007    | 13     | 7      | 0           | 4           | 191    | 125    | 47     | 65     | 21     | 19    | <b>493</b>     |
| chr2R    | dme-mir-1008    | 94     | 262    | 13          | 9           | 208    | 104    | 106    | 123    | 39     | 2     | <b>960</b>     |
| chr2R    | dme-mir-1009    | 4      | 9      | 8           | 2           | 53     | 85     | 38     | 10     | 18     | 174   | <b>400</b>     |
| chr3R    | dme-mir-1010    | 1      | 106    | 2           | 0           | 1490   | 1677   | 319    | 315    | 588    | 15    | <b>4514</b>    |
| chr3R    | dme-mir-1011    | 0      | 0      | 0           | 0           | 14     | 19     | 1      | 0      | 11     | 0     | <b>45</b>      |
| chr3R    | dme-mir-1012    | 164    | 63     | 368         | 346         | 655    | 623    | 215    | 271    | 161    | 77    | <b>2943</b>    |
| chr3R    | dme-mir-1013    | 1      | 6      | 5           | 4           | 158    | 131    | 52     | 82     | 189    | 2     | <b>630</b>     |
| chr3R    | dme-mir-1014    | 0      | 0      | 0           | 0           | 0      | 0      | 248    | 226    | 0      | 0     | <b>474</b>     |
| chr3R    | dme-mir-1015    | 0      | 0      | 0           | 0           | 0      | 1      | 62     | 51     | 7      | 0     | <b>121</b>     |
| chr2R    | dme-mir-1016    | 5      | 6      | 5           | 4           | 61     | 76     | 18     | 27     | 21     | 0     | <b>224</b>     |
| chr3R    | dme-mir-1017    | 0      | 0      | 0           | 0           | 320    | 278    | 25     | 21     | 4      | 0     | <b>648</b>     |
| chr3R    | dme-mir-11      | 15690  | 13979  | 8011        | 12439       | 10872  | 21450  | 14438  | 19221  | 32372  | 6453  | <b>154924</b>  |
| chrX     | dme-mir-12      | 415    | 10569  | 26226       | 43021       | 1956   | 2682   | 21306  | 9603   | 217798 | 4407  | <b>337984</b>  |
| chr2L    | dme-mir-124     | 8      | 94     | 16          | 16          | 52268  | 48896  | 2863   | 1611   | 529    | 2     | <b>106303</b>  |
| chr2L    | dme-mir-125     | 10     | 4      | 37          | 63          | 12564  | 20670  | 5238   | 5890   | 11659  | 485   | <b>56620</b>   |
| chr2L    | dme-mir-133     | 5      | 4      | 10          | 4           | 8468   | 16473  | 1065   | 1029   | 133    | 2     | <b>27193</b>   |
| chr2R    | dme-mir-137     | 0      | 3      | 0           | 1           | 1228   | 1301   | 341    | 274    | 133    | 0     | <b>3281</b>    |
| chr3R    | dme-mir-13a     | 25     | 85     | 18          | 17          | 9820   | 9074   | 797    | 693    | 102    | 10    | <b>20640</b>   |
| chr3R    | dme-mir-13b     | 11557  | 14716  | 8331        | 12399       | 48948  | 34823  | 21017  | 24449  | 18242  | 10586 | <b>205067</b>  |
| chr3R    | dme-mir-13b-1   | 0      | 0      | 11          | 9           | 25     | 22     | 4      | 3      | 0      | 0     | <b>74</b>      |
| chrX     | dme-mir-13b-2   | 299    | 450    | 99          | 70          | 47     | 101    | 92     | 189    | 4      | 172   | <b>1522</b>    |
| chr2R    | dme-mir-14      | 182756 | 195051 | 4163        | 2658        | 54709  | 68581  | 26146  | 18871  | 23527  | 3037  | <b>579498</b>  |
| chr2R    | dme-mir-184     | 54062  | 109778 | 1296        | 1085        | 90077  | 89330  | 15336  | 27014  | 1890   | 30821 | <b>420688</b>  |
| chr3L    | dme-mir-190     | 171    | 462    | 208         | 168         | 2189   | 634    | 162    | 579    | 46     | 35    | <b>4653</b>    |
| chr3L    | dme-mir-193     | 3      | 96     | 0           | 4           | 3464   | 4491   | 12     | 3      | 25     | 2     | <b>8099</b>    |
| chrX     | dme-mir-210     | 1      | 1      | 50          | 29          | 54115  | 106957 | 409    | 415    | 35     | 0     | <b>162012</b>  |
| chr3L    | dme-mir-219     | 0      | 0      | 2           | 0           | 454    | 437    | 84     | 72     | 4      | 0     | <b>1052</b>    |
| chr2RHet | dme-mir-2279    | 8      | 13     | 3           | 5           | 12     | 16     | 12     | 10     | 11     | 0     | <b>91</b>      |
| chr2RHet | dme-mir-2279-as | 0      | 1      | 0           | 1           | 0      | 0      | 0      | 0      | 0      | 0     | <b>2</b>       |
| chr2L    | dme-mir-2280    | 0      | 0      | 0           | 0           | 0      | 0      | 1      | 0      | 0      | 0     | <b>1</b>       |
| chr3R    | dme-mir-2281    | 0      | 0      | 0           | 0           | 0      | 1      | 4      | 3      | 0      | 0     | <b>8</b>       |
| chr3L    | dme-mir-2282    | 1      | 4      | 0           | 0           | 0      | 0      | 0      | 0      | 0      | 0     | <b>5</b>       |
| chr3R    | dme-mir-2283    | 0      | 0      | 0           | 0           | 5      | 3      | 4      | 0      | 4      | 0     | <b>16</b>      |
| chr3R    | dme-mir-252     | 13294  | 205    | 1330        | 644         | 25243  | 37717  | 4036   | 4869   | 3465   | 41    | <b>90843</b>   |
| chr2L    | dme-mir-263a    | 66     | 4      | 43838       | 39275       | 30321  | 25950  | 11829  | 13344  | 858    | 7035  | <b>172520</b>  |
| chr3L    | dme-mir-263b    | 1      | 3      | 3           | 6           | 5500   | 6005   | 1144   | 902    | 46     | 0     | <b>13610</b>   |
| chr3L    | dme-mir-274     | 1      | 0      | 19          | 16          | 24301  | 55708  | 3593   | 4042   | 27748  | 10    | <b>115438</b>  |
| chr2L    | dme-mir-275     | 461    | 1247   | 21773       | 2588        | 1170   | 2503   | 1122   | 2616   | 2118   | 12586 | <b>48183</b>   |
| chr2L    | dme-mir-275-as  | 0      | 0      | 0           | 1           | 2      | 1      | 0      | 0      | 0      | 0     | <b>4</b>       |
| chr3L    | dme-mir-276     | 4524   | 15417  | 3114        | 5840        | 119752 | 58112  | 47955  | 128270 | 431    | 2525  | <b>385939</b>  |
| chr3L    | dme-mir-276a    | 9143   | 10875  | 1853        | 3728        | 129076 | 163232 | 90583  | 109217 | 7868   | 2710  | <b>528285</b>  |
| chr3L    | dme-mir-276b    | 5      | 187    | 2           | 8           | 12825  | 16746  | 530    | 384    | 11     | 0     | <b>30697</b>   |
| chr3R    | dme-mir-277     | 3703   | 2530   | 1291        | 1660        | 103586 | 104947 | 76053  | 68534  | 33397  | 168   | <b>395869</b>  |
| chr2R    | dme-mir-278     | 47     | 1647   | 1275        | 526         | 4954   | 9122   | 4966   | 6994   | 8491   | 226   | <b>38248</b>   |

|       |                |       |       |        |        |        |        |        |        |        |       |                |
|-------|----------------|-------|-------|--------|--------|--------|--------|--------|--------|--------|-------|----------------|
| chr3R | dme-mir-279    | 16526 | 15128 | 514    | 1492   | 14613  | 13021  | 14571  | 14205  | 5439   | 1208  | <b>96716</b>   |
| chr2R | dme-mir-281-1  | 179   | 198   | 88     | 118    | 455    | 557    | 17602  | 18346  | 501    | 1009  | <b>39053</b>   |
| chr2R | dme-mir-281-2  | 34    | 34    | 85     | 84     | 485    | 439    | 5100   | 5931   | 74     | 340   | <b>12606</b>   |
| chr3L | dme-mir-282    | 13543 | 4622  | 6635   | 31936  | 11981  | 6760   | 23325  | 43042  | 38752  | 6625  | <b>187220</b>  |
| chrX  | dme-mir-283    | 48    | 1394  | 7493   | 7791   | 648    | 448    | 577    | 1245   | 1257   | 257   | <b>21157</b>   |
| chr3R | dme-mir-284    | 0     | 7     | 3      | 1      | 907    | 2009   | 523    | 398    | 56     | 44    | <b>3949</b>    |
| chr3L | dme-mir-285    | 0     | 0     | 19     | 38     | 71480  | 63213  | 76     | 14     | 0      | 0     | <b>134840</b>  |
| chr2R | dme-mir-286    | 43    | 21    | 37     | 31     | 7      | 15     | 5      | 3      | 0      | 0     | <b>162</b>     |
| chr2L | dme-mir-287    | 0     | 0     | 0      | 0      | 0      | 0      | 0      | 3      | 0      | 0     | <b>3</b>       |
| chr3L | dme-mir-289    | 0     | 0     | 0      | 0      | 0      | 0      | 0      | 3      | 0      | 0     | <b>3</b>       |
| chr2L | dme-mir-2a     | 7839  | 29779 | 12762  | 9677   | 71729  | 62518  | 42678  | 74931  | 49756  | 37175 | <b>398844</b>  |
| chr2L | dme-mir-2a-1   | 173   | 388   | 26     | 27     | 60     | 64     | 21     | 75     | 46     | 118   | <b>997</b>     |
| chr2L | dme-mir-2a-2   | 2015  | 9699  | 179    | 164    | 3117   | 4486   | 1047   | 1245   | 392    | 655   | <b>22999</b>   |
| chr2L | dme-mir-2b     | 9981  | 20837 | 10205  | 7854   | 75902  | 58488  | 18220  | 30809  | 21203  | 15884 | <b>269383</b>  |
| chr2L | dme-mir-2b-1   | 498   | 207   | 738    | 465    | 2949   | 1927   | 623    | 1125   | 7      | 363   | <b>8901</b>    |
| chr2L | dme-mir-2b-2   | 431   | 1648  | 302    | 177    | 1250   | 1184   | 615    | 1094   | 140    | 862   | <b>7704</b>    |
| chr3R | dme-mir-2c     | 9     | 19    | 5      | 0      | 285    | 287    | 27     | 34     | 67     | 2     | <b>735</b>     |
| chr2R | dme-mir-3      | 15    | 12    | 2      | 1      | 5      | 5      | 2      | 3      | 28     | 6     | <b>79</b>      |
| chrX  | dme-mir-303    | 7     | 12    | 0      | 0      | 2      | 3      | 142    | 3      | 396    | 128   | <b>692</b>     |
| chrX  | dme-mir-304    | 34    | 1260  | 24022  | 30430  | 2252   | 2492   | 17186  | 7227   | 1946   | 1436  | <b>88286</b>   |
| chr2L | dme-mir-305    | 3321  | 10310 | 11464  | 9763   | 19850  | 20428  | 13965  | 12658  | 65041  | 5208  | <b>172008</b>  |
| chr2L | dme-mir-305-as | 0     | 4     | 3      | 7      | 21     | 8      | 0      | 3      | 0      | 2     | <b>49</b>      |
| chr2L | dme-mir-306    | 2500  | 6128  | 1707   | 1144   | 1317   | 2067   | 1152   | 1711   | 3329   | 1954  | <b>23008</b>   |
| chr2R | dme-mir-307    | 932   | 33    | 2      | 0      | 9783   | 15933  | 2063   | 1653   | 147    | 474   | <b>31019</b>   |
| chr2R | dme-mir-307-as | 1     | 0     | 8      | 17     | 0      | 3      | 6      | 3      | 0      | 0     | <b>38</b>      |
| chr2R | dme-mir-308    | 1483  | 2525  | 4450   | 5046   | 1835   | 1674   | 1864   | 2345   | 105    | 624   | <b>21951</b>   |
| chr2R | dme-mir-309    | 4     | 4     | 2      | 0      | 0      | 1      | 0      | 0      | 0      | 0     | <b>11</b>      |
| chr2R | dme-mir-310    | 8     | 6     | 2      | 0      | 4      | 2      | 55     | 31     | 11746  | 228   | <b>12081</b>   |
| chr2R | dme-mir-311    | 8     | 3     | 0      | 0      | 2      | 2      | 68     | 45     | 12537  | 460   | <b>13124</b>   |
| chr2R | dme-mir-312    | 3     | 9     | 0      | 0      | 14     | 9      | 95     | 137    | 5964   | 2803  | <b>9034</b>    |
| chr2R | dme-mir-313    | 2     | 3     | 0      | 0      | 7      | 4      | 59     | 27     | 1295   | 1216  | <b>2613</b>    |
| chr3L | dme-mir-314    | 0     | 3     | 3      | 3      | 32     | 72     | 11627  | 15254  | 102    | 31    | <b>27126</b>   |
| chr3L | dme-mir-315    | 0     | 0     | 0      | 0      | 2108   | 2424   | 24     | 24     | 42     | 0     | <b>4622</b>    |
| chr3L | dme-mir-316    | 0     | 0     | 13     | 14     | 1959   | 3236   | 5546   | 5873   | 15460  | 644   | <b>32745</b>   |
| chr3R | dme-mir-317    | 9157  | 21083 | 1149   | 1536   | 15714  | 14533  | 2370   | 1923   | 15712  | 1023  | <b>84200</b>   |
| chr3R | dme-mir-318    | 13    | 90    | 0      | 1      | 2      | 6      | 4      | 261    | 70     | 34886 | <b>35333</b>   |
| chr2R | dme-mir-31a    | 5     | 18    | 834    | 763    | 20323  | 22138  | 24842  | 37845  | 3969   | 1703  | <b>112439</b>  |
| chrX  | dme-mir-31b    | 3     | 4     | 0      | 0      | 12     | 44     | 2068   | 1533   | 3063   | 329   | <b>7055</b>    |
| chr3L | dme-mir-33     | 1927  | 4040  | 1982   | 2256   | 3264   | 3555   | 9633   | 6768   | 581    | 4025  | <b>38031</b>   |
| chr3R | dme-mir-34     | 13980 | 22763 | 2629   | 2983   | 79455  | 77345  | 9383   | 11126  | 40124  | 6344  | <b>266132</b>  |
| chr2L | dme-mir-375    | 1     | 0     | 29992  | 34030  | 100    | 182    | 4698   | 2781   | 5219   | 0     | <b>77002</b>   |
| chr2R | dme-mir-4      | 6     | 3     | 2      | 6      | 5      | 5      | 2      | 0      | 0      | 0     | <b>29</b>      |
| chr2R | dme-mir-5      | 14    | 13    | 29     | 26     | 12     | 22     | 14     | 14     | 0      | 8     | <b>152</b>     |
| chr2R | dme-mir-6      | 10    | 4     | 0      | 0      | 0      | 0      | 0      | 0      | 0      | 0     | <b>14</b>      |
| chr2R | dme-mir-7      | 332   | 364   | 282    | 270    | 24251  | 20729  | 3010   | 3182   | 3021   | 2356  | <b>57796</b>   |
| chr2L | dme-mir-79     | 2043  | 5420  | 2566   | 3518   | 13483  | 13318  | 12143  | 7529   | 767    | 6723  | <b>67511</b>   |
| chr2R | dme-mir-8      | 4003  | 27812 | 135955 | 180692 | 323642 | 244757 | 447346 | 655203 | 198170 | 44755 | <b>2262335</b> |
| chr2L | dme-mir-87     | 0     | 3     | 3      | 4      | 4105   | 4107   | 908    | 1834   | 42     | 110   | <b>11116</b>   |
| chrX  | dme-mir-927    | 0     | 1     | 0      | 0      | 1159   | 994    | 41     | 31     | 0      | 0     | <b>2227</b>    |
| chr3R | dme-mir-929    | 1     | 3     | 32     | 39     | 21034  | 13343  | 1810   | 2808   | 14     | 23    | <b>39107</b>   |
| chr3R | dme-mir-92a    | 13    | 2215  | 3      | 7      | 2488   | 2484   | 254    | 579    | 4984   | 1514  | <b>14541</b>   |
| chr3R | dme-mir-92b    | 20    | 670   | 50     | 64     | 95     | 68     | 42     | 233    | 2615   | 990   | <b>4845</b>    |
| chr2L | dme-mir-932    | 5     | 177   | 6      | 2      | 6328   | 8766   | 276    | 240    | 158    | 4     | <b>15962</b>   |
| chr4  | dme-mir-954    | 11    | 91    | 2      | 1      | 103    | 124    | 50     | 38     | 217    | 43    | <b>680</b>     |
| chr3L | dme-mir-955    | 0     | 0     | 0      | 0      | 95     | 84     | 59     | 89     | 25     | 2     | <b>353</b>     |
| chr3L | dme-mir-956    | 0     | 1     | 0      | 1      | 7      | 20     | 4342   | 4776   | 189    | 17    | <b>9354</b>    |
| chr3L | dme-mir-957    | 0     | 0     | 3      | 7      | 10776  | 12255  | 839    | 1053   | 0      | 0     | <b>24933</b>   |
| chr3L | dme-mir-958    | 1     | 28    | 0      | 1      | 5      | 29     | 7379   | 7210   | 32     | 0     | <b>14686</b>   |
| chr2L | dme-mir-959    | 0     | 0     | 0      | 0      | 12     | 18     | 478    | 10     | 60382  | 8     | <b>60908</b>   |
| chr2L | dme-mir-960    | 0     | 1     | 0      | 2      | 53     | 103    | 1717   | 117    | 19026  | 21    | <b>21040</b>   |
| chr2L | dme-mir-961    | 0     | 0     | 0      | 0      | 9      | 20     | 177    | 17     | 1670   | 10    | <b>1902</b>    |
| chr2L | dme-mir-962    | 0     | 0     | 2      | 0      | 49     | 55     | 401    | 134    | 1649   | 64    | <b>2353</b>    |

|                               |                 |               |               |               |               |                |                |                |                |                |               |               |
|-------------------------------|-----------------|---------------|---------------|---------------|---------------|----------------|----------------|----------------|----------------|----------------|---------------|---------------|
| chr2L                         | dme-mir-963     | 0             | 1             | 0             | 0             | 9              | 20             | 368            | 21             | 3241           | 2             | <b>3662</b>   |
| chr2L                         | dme-mir-964     | 0             | 0             | 0             | 0             | 12             | 41             | 437            | 34             | 35403          | 10            | <b>35937</b>  |
| chr2L                         | dme-mir-965     | 559           | 911           | 210           | 567           | 632            | 613            | 1129           | 689            | 32             | 280           | <b>5622</b>   |
| chr2L                         | dme-mir-966     | 15            | 58            | 2             | 4             | 14             | 12             | 5              | 21             | 21             | 41            | <b>192</b>    |
| chr2L                         | dme-mir-967     | 10            | 10            | 0             | 1             | 7              | 2              | 3              | 0              | 0              | 0             | <b>33</b>     |
| chr2L                         | dme-mir-968     | 0             | 0             | 0             | 0             | 4              | 3              | 0              | 0              | 0              | 0             | <b>7</b>      |
| chrX                          | dme-mir-969     | 0             | 0             | 0             | 2             | 340            | 192            | 27             | 21             | 0              | 0             | <b>581</b>    |
| chrX                          | dme-mir-970     | 1140          | 1776          | 283           | 198           | 2525           | 3119           | 656            | 703            | 350            | 114           | <b>10864</b>  |
| chrX                          | dme-mir-971     | 0             | 52            | 0             | 1             | 70             | 70             | 4              | 0              | 116            | 0             | <b>313</b>    |
| chrX                          | dme-mir-972     | 0             | 0             | 0             | 0             | 0              | 1              | 61             | 0              | 3364           | 0             | <b>3426</b>   |
| chrX                          | dme-mir-973     | 0             | 12            | 0             | 0             | 0              | 0              | 76             | 3              | 179            | 0             | <b>270</b>    |
| chrX                          | dme-mir-974     | 0             | 3             | 0             | 0             | 9              | 2              | 236            | 3              | 287            | 0             | <b>540</b>    |
| chrX                          | dme-mir-975     | 0             | 4             | 0             | 0             | 0              | 0              | 33             | 0              | 7469           | 0             | <b>7507</b>   |
| chrX                          | dme-mir-976     | 0             | 1             | 0             | 0             | 0              | 2              | 380            | 7              | 26338          | 0             | <b>26728</b>  |
| chrX                          | dme-mir-977     | 1             | 66            | 0             | 0             | 5              | 4              | 680            | 0              | 28350          | 0             | <b>29106</b>  |
| chrX                          | dme-mir-978     | 1             | 6             | 0             | 0             | 4              | 3              | 241            | 3              | 29600          | 0             | <b>29857</b>  |
| chrX                          | dme-mir-979     | 0             | 0             | 0             | 0             | 0              | 0              | 21             | 0              | 1740           | 0             | <b>1761</b>   |
| chrX                          | dme-mir-980     | 1534          | 453           | 5             | 3             | 611            | 1464           | 2995           | 3113           | 539            | 106           | <b>10823</b>  |
| chrX                          | dme-mir-981     | 1             | 1427          | 0             | 3             | 404            | 968            | 56             | 65             | 56             | 0             | <b>2980</b>   |
| chrX                          | dme-mir-982     | 0             | 16            | 0             | 0             | 2              | 3              | 118            | 10             | 420            | 89            | <b>658</b>    |
| chrX                          | dme-mir-983     | 6             | 13            | 0             | 0             | 16             | 16             | 724            | 24             | 23562          | 798           | <b>25160</b>  |
| chrX                          | dme-mir-983-1   | 0             | 0             | 0             | 0             | 0              | 0              | 1              | 0              | 4              | 4             | <b>8</b>      |
| chrX                          | dme-mir-984     | 25            | 102           | 0             | 0             | 18             | 11             | 551            | 24             | 7704           | 1378          | <b>9812</b>   |
| chrX                          | dme-mir-985     | 0             | 0             | 0             | 0             | 2              | 0              | 214            | 7              | 1124           | 2             | <b>1348</b>   |
| chr2R                         | dme-mir-986     | 3             | 43            | 338           | 226           | 475            | 1006           | 1880           | 1749           | 1082           | 582           | <b>7383</b>   |
| chr2R                         | dme-mir-987     | 0             | 4             | 14            | 36            | 25758          | 16043          | 803            | 1056           | 11             | 0             | <b>43726</b>  |
| chr2R                         | dme-mir-988     | 13800         | 22601         | 893           | 539           | 1086           | 1460           | 876            | 960            | 23055          | 414           | <b>65683</b>  |
| chr2R                         | dme-mir-989     | 3             | 237           | 22            | 30            | 2              | 6              | 44             | 45010          | 21             | 88414         | <b>133789</b> |
| chr2R                         | dme-mir-990     | 0             | 0             | 0             | 0             | 669            | 430            | 8              | 7              | 0              | 0             | <b>1114</b>   |
| chr2R                         | dme-mir-991     | 0             | 0             | 0             | 0             | 0              | 1              | 120            | 7              | 445            | 8             | <b>580</b>    |
| chr2R                         | dme-mir-992     | 2             | 6             | 0             | 0             | 0              | 1              | 45             | 3              | 1383           | 0             | <b>1440</b>   |
| chr3R                         | dme-mir-993     | 0             | 1             | 0             | 2             | 1720           | 1433           | 1448           | 1077           | 4              | 0             | <b>5684</b>   |
| chr3R                         | dme-mir-994     | 5             | 40            | 0             | 2             | 4              | 3              | 4              | 261            | 67             | 14463         | <b>14848</b>  |
| chr3R                         | dme-mir-995     | 3761          | 5626          | 2610          | 3220          | 3949           | 3287           | 909            | 1574           | 798            | 3679          | <b>29411</b>  |
| chr3R                         | dme-mir-996     | 23117         | 15398         | 4771          | 6077          | 18293          | 27396          | 29997          | 27603          | 1218           | 28482         | <b>182353</b> |
| chr3R                         | dme-mir-997     | 0             | 0             | 0             | 0             | 0              | 0              | 184            | 0              | 207            | 0             | <b>391</b>    |
| chr3R                         | dme-mir-998     | 3118          | 5942          | 3397          | 5021          | 8319           | 5610           | 1074           | 1574           | 294            | 779           | <b>35128</b>  |
| chr3R                         | dme-mir-999     | 247           | 560           | 43            | 35            | 12595          | 10562          | 1464           | 2643           | 2356           | 141           | <b>30647</b>  |
| chr3L                         | dme-mir-9a      | 49            | 124           | 2464          | 2193          | 21120          | 32808          | 28787          | 30216          | 23961          | 77            | <b>141799</b> |
| chr2L                         | dme-mir-9b      | 2463          | 11885         | 2011          | 1648          | 2726           | 3726           | 4263           | 5513           | 23545          | 10570         | <b>68350</b>  |
| chr2L                         | dme-mir-9c      | 1896          | 5648          | 1179          | 920           | 4579           | 5475           | 5508           | 8331           | 7175           | 4518          | <b>45229</b>  |
| chr3R                         | dme-mir-iab-4   | 0             | 1             | 0             | 0             | 4              | 2              | 94             | 120            | 25             | 2             | <b>247</b>    |
| chr3R                         | dme-mir-iab-4as | 0             | 0             | 0             | 0             | 0              | 1              | 144            | 96             | 56             | 0             | <b>297</b>    |
| <b>SUM_Norm_Reads_in_libr</b> |                 | <b>476512</b> | <b>670269</b> | <b>419331</b> | <b>506593</b> | <b>2221284</b> | <b>2140318</b> | <b>1943944</b> | <b>2554945</b> | <b>1290996</b> | <b>481225</b> |               |

**TABLE S11:** Abundance of miRNAs in *msl3* mutant salivary glands

|         | Genotype    | Exp. | Average Ct <sup>a</sup> | Corrected amount <sup>b</sup> | Fold Difference (FD) <sup>c</sup> | log <sub>2</sub> (FD) | Average log <sub>2</sub> (FD) | SD <sup>d</sup> | p value <sup>e</sup> |
|---------|-------------|------|-------------------------|-------------------------------|-----------------------------------|-----------------------|-------------------------------|-----------------|----------------------|
| Dspt4   | msl3-/msl3+ | 1    | 23.5091                 | 95.762                        | 1.000                             | 0.000                 | 0.000                         | 0.000           |                      |
|         |             | 2    | 23.7935                 | 200.048                       | 1.000                             | 0.000                 |                               |                 |                      |
|         | msl3-/msl3- | 1    | 23.2659                 | 106.222                       |                                   |                       |                               |                 |                      |
|         |             | 2    | 23.2766                 | 250.610                       |                                   |                       |                               |                 |                      |
| mir-283 | msl3-/msl3+ | 1    | 24.9728                 | 89.769                        | 0.514                             | -0.961                | -0.901                        | 0.086           | 0.00045              |
|         |             | 2    | 24.7449                 | 185.152                       | 0.559                             | -0.840                |                               |                 |                      |
|         | msl3-/msl3- | 1    | 26.4340                 | 57.172                        |                                   |                       |                               |                 |                      |
|         |             | 2    | 26.1674                 | 129.580                       |                                   |                       |                               |                 |                      |
| mir-304 | msl3-/msl3+ | 1    | 29.9743                 | 100.663                       | 0.338                             | -1.564                | -1.631                        | 0.095           | 0.00070              |
|         |             | 2    | 30.2644                 | 203.835                       | 0.308                             | -1.698                |                               |                 |                      |
|         | msl3-/msl3- | 1    | 32.2164                 | 37.754                        |                                   |                       |                               |                 |                      |
|         |             | 2    | 32.3252                 | 78.686                        |                                   |                       |                               |                 |                      |
| mir-12  | msl3-/msl3+ | 1    | 21.5294                 | 88.515                        | 0.406                             | -1.300                | -1.284                        | 0.022           | 0.00006              |
|         |             | 2    | 21.8149                 | 182.599                       | 0.415                             | -1.269                |                               |                 |                      |
|         | msl3-/msl3- | 1    | 23.8153                 | 39.885                        |                                   |                       |                               |                 |                      |
|         |             | 2    | 24.1442                 | 94.941                        |                                   |                       |                               |                 |                      |
| mir-979 | msl3-/msl3+ | 1    | 36.2751                 | 149.915                       | 0.833                             | -0.263                | -0.749                        | 0.687           | 0.24047              |
|         |             | 2    | 35.4645                 | 209.309                       | 0.425                             | -1.235                |                               |                 |                      |
|         | msl3-/msl3- | 1    | 36.5484                 | 138.570                       |                                   |                       |                               |                 |                      |
|         |             | 2    | 37.5508                 | 111.399                       |                                   |                       |                               |                 |                      |
| mir-210 | msl3-/msl3+ | 1    | 28.5830                 | 100.340                       | 1.425                             | 0.511                 | 0.384                         | 0.180           | 0.07654              |
|         |             | 2    | 29.1231                 | 202.647                       | 1.195                             | 0.257                 |                               |                 |                      |
|         | msl3-/msl3- | 1    | 27.8037                 | 158.625                       |                                   |                       |                               |                 |                      |
|         |             | 2    | 28.3154                 | 303.278                       |                                   |                       |                               |                 |                      |
| U6      | msl3-/msl3+ | 1    | 17.1883                 | 100.088                       | 0.611                             | -0.710                | -0.627                        | 0.117           | 0.01472              |
|         |             | 2    | 17.7507                 | 184.333                       | 0.686                             | -0.544                |                               |                 |                      |
|         | msl3-/msl3- | 1    | 18.0034                 | 67.880                        |                                   |                       |                               |                 |                      |
|         |             | 2    | 18.2684                 | 158.374                       |                                   |                       |                               |                 |                      |

a. Dilution series were prepared in the control sample to construct standard curves for the Dspt4 autosomal gene reference and for each miRNA. C<sub>T</sub> values measured in replicates for the target miRNA and Dspt4 reference in mutant and heterozygous mutant control samples respectively are averaged in individual experiments (Exp.1 and 2) and the corrected amount of target miRNA and Dspt4 reference inferred from the standard curve in b.

c. The amounts of miRNA are normalized in the mutant sample and in the heterozygous mutant control sample by dividing the calculated amount of miRNA by the amount of the Dspt4 reference. The fold difference (FD) or relative expression level of a miRNA corresponds to the

ratio of the normalized abundance of the miRNA in the mutant relative to the heterozygous mutant control sample, that is the ratio  $[\text{miRNA/Dspt4}] \text{ Mutant} / [\text{miRNA/Dspt4}] \text{ Control}$ ; the average of the base 2 logarithm of the fold difference is plotted in Figure 2B,C.

d. SD is the standard deviation of the difference.

e. p-values are established in a two tailed Students t-test comparing the means of the normalized amounts of target miRNA in the mutant and in the heterozygous mutant control samples.

\* $p < 0.05$ , \*\* $p < 0.005$ . \*\*\* $p < 0.0005$



**TABLE S12:** Abundance of miRNAs in *msl3* mutant L3 larvae

|         | Genotype    | Exp. | Average Ct <sup>a</sup> | Corrected amount <sup>b</sup> | Fold Difference (FD) <sup>c</sup> | log <sub>2</sub> (FD) | Average log <sub>2</sub> (FD) | SD <sup>d</sup> | p value <sup>e</sup> |
|---------|-------------|------|-------------------------|-------------------------------|-----------------------------------|-----------------------|-------------------------------|-----------------|----------------------|
| Dspt4   | msl3-/msl3+ | 1    | 25.9974                 | 34.628                        | 1.000                             | 0.000                 |                               |                 |                      |
|         |             | 2    | 25.6265                 | 92.801                        | 1.000                             | 0.000                 |                               |                 |                      |
|         | msl3-/msl3- | 1    | 24.8854                 | 54.398                        |                                   |                       |                               |                 |                      |
|         |             | 2    | 24.7720                 | 132.066                       |                                   |                       |                               |                 |                      |
| mir-283 | msl3-/msl3+ | 1    | 26.9201                 | 49.324                        | 0.756                             | -0.403                | -0.253                        | 0.213           | 0.18885              |
|         |             | 2    | 27.2713                 | 98.504                        | 0.932                             | -0.102                |                               |                 |                      |
|         | msl3-/msl3- | 1    | 26.3534                 | 58.590                        |                                   |                       |                               |                 |                      |
|         |             | 2    | 26.1358                 | 130.596                       |                                   |                       |                               |                 |                      |
| mir-304 | msl3-/msl3+ | 1    | 31.2445                 | 57.627                        | 0.356                             | -1.488                | -1.475                        | 0.019           | 0.03552              |
|         |             | 2    | 31.5988                 | 109.348                       | 0.363                             | -1.462                |                               |                 |                      |
|         | msl3-/msl3- | 1    | 32.5782                 | 32.271                        |                                   |                       |                               |                 |                      |
|         |             | 2    | 33.0699                 | 56.492                        |                                   |                       |                               |                 |                      |
| mir-12  | msl3-/msl3+ | 1    | 22.7659                 | 57.656                        | 0.455                             | -1.136                | -1.040                        | 0.136           | 0.00881              |
|         |             | 2    | 22.9153                 | 134.505                       | 0.520                             | -0.943                |                               |                 |                      |
|         | msl3-/msl3- | 1    | 23.7208                 | 41.214                        |                                   |                       |                               |                 |                      |
|         |             | 2    | 23.9739                 | 99.544                        |                                   |                       |                               |                 |                      |
| mir-979 | msl3-/msl3+ | 1    | 31.1498                 | 1044.716                      | 0.760                             | -0.396                | -0.259                        | 0.193           | 0.38647              |
|         |             | 2    | 31.4659                 | 927.357                       | 0.918                             | -0.123                |                               |                 |                      |
|         | msl3-/msl3- | 1    | 30.6831                 | 1247.539                      |                                   |                       |                               |                 |                      |
|         |             | 2    | 30.7420                 | 1211.981                      |                                   |                       |                               |                 |                      |
| mir-210 | msl3-/msl3+ | 1    | 27.5383                 | 185.744                       | 1.197                             | 0.259                 | 0.065                         | 0.275           | 0.38641              |
|         |             | 2    | 27.5514                 | 461.878                       | 0.914                             | -0.129                |                               |                 |                      |
|         | msl3-/msl3- | 1    | 26.4166                 | 349.245                       |                                   |                       |                               |                 |                      |
|         |             | 2    | 26.9873                 | 600.996                       |                                   |                       |                               |                 |                      |
| U6      | msl3-/msl3+ | 1    | 17.1512                 | 101.819                       | 0.694                             | -0.526                | -0.444                        | 0.117           | 0.14280              |
|         |             | 2    | 17.5728                 | 194.135                       | 0.778                             | -0.362                |                               |                 |                      |
|         | msl3-/msl3- | 1    | 16.9733                 | 111.054                       |                                   |                       |                               |                 |                      |
|         |             | 2    | 17.2156                 | 215.036                       |                                   |                       |                               |                 |                      |

a-e as in Table S11.

**TABLE S13:** Abundance of miRNAs in *msl3* mutant salivary glands

|          | Genotype    | Exp. | Average Ct <sup>a</sup> | Corrected amount <sup>b</sup> | Fold Difference (FD) <sup>c</sup> | log <sub>2</sub> (FD) | Average log <sub>2</sub> (FD) | SD <sup>d</sup> | p value <sup>e</sup> |
|----------|-------------|------|-------------------------|-------------------------------|-----------------------------------|-----------------------|-------------------------------|-----------------|----------------------|
| Dspt4    | msl3-/msl3+ | 1    | 24.216                  | 100.872                       | 1.000                             | 0.000                 | 0.000                         | 0.000           |                      |
|          |             | 2    | 24.262                  | 99.102                        | 1.000                             | 0.000                 |                               |                 |                      |
|          | msl3-/msl3- | 1    | 23.663                  | 124.744                       |                                   |                       |                               |                 |                      |
|          |             | 2    | 24.150                  | 103.457                       |                                   |                       |                               |                 |                      |
| mir-314  | msl3-/msl3+ | 1    | 31.225                  | 100.048                       | 2.258                             | 1.175                 | 1.149                         | 0.037           | 0.0667               |
|          |             | 2    | 30.498                  | 152.880                       | 2.178                             | 1.123                 |                               |                 |                      |
|          | msl3-/msl3- | 1    | 29.463                  | 279.422                       |                                   |                       |                               |                 |                      |
|          |             | 2    | 29.089                  | 347.564                       |                                   |                       |                               |                 |                      |
| mir-981  | msl3-/msl3+ | 1    | 32.920                  | 117.805                       | 0.958                             | -0.061                | 0.197                         | 0.366           | 0.2414               |
|          |             | 2    | 33.704                  | 84.927                        | 1.372                             | 0.456                 |                               |                 |                      |
|          | msl3-/msl3- | 1    | 32.513                  | 139.636                       |                                   |                       |                               |                 |                      |
|          |             | 2    | 32.844                  | 121.608                       |                                   |                       |                               |                 |                      |
| mir-13b  | msl3-/msl3+ | 1    | 23.450                  | 122.437                       | 0.411                             | -1.282                | -0.884                        | 0.564           | 0.0703               |
|          |             | 2    | 24.218                  | 81.676                        | 0.714                             | -0.485                |                               |                 |                      |
|          | msl3-/msl3- | 1    | 24.733                  | 62.257                        |                                   |                       |                               |                 |                      |
|          |             | 2    | 24.774                  | 60.919                        |                                   |                       |                               |                 |                      |
| mir-100  | msl3-/msl3+ | 1    | 29.324                  | 99.987                        | 1.185                             | 0.245                 | 0.545                         | 0.425           | 0.0596               |
|          |             | 2    | 29.977                  | 75.275                        | 1.796                             | 0.845                 |                               |                 |                      |
|          | msl3-/msl3- | 1    | 28.447                  | 146.492                       |                                   |                       |                               |                 |                      |
|          |             | 2    | 28.532                  | 141.148                       |                                   |                       |                               |                 |                      |
| mir-1013 | msl3-/msl3+ | 1    | 31.660                  | 84.010                        | 1.176                             | 0.234                 | -0.137                        | 0.524           | 0.3233               |
|          |             | 2    | 31.010                  | 119.016                       | 0.704                             | -0.507                |                               |                 |                      |
|          | msl3-/msl3- | 1    | 30.962                  | 122.159                       |                                   |                       |                               |                 |                      |
|          |             | 2    | 31.585                  | 87.439                        |                                   |                       |                               |                 |                      |
| U6       | msl3-/msl3+ | 1    | 18.097                  | 100.004                       | 0.726                             | -0.462                | -0.418                        | 0.061           | 0.0046               |
|          |             | 2    | 18.127                  | 98.736                        | 0.771                             | -0.375                |                               |                 |                      |
|          | msl3-/msl3- | 1    | 18.352                  | 89.811                        |                                   |                       |                               |                 |                      |
|          |             | 2    | 18.643                  | 79.476                        |                                   |                       |                               |                 |                      |

a-e as in Table S11.

**TABLE S14:** Abundance of miRNAs in *msl3* mutant L3 larvae

|          | Genotype    | Exp. | Average Ct <sup>a</sup> | Corrected amount <sup>b</sup> | Fold Difference (FD) <sup>c</sup> | log2 (FD) | Average log2(FD) | SD <sup>d</sup> | p value <sup>e</sup> |
|----------|-------------|------|-------------------------|-------------------------------|-----------------------------------|-----------|------------------|-----------------|----------------------|
| Dspt4    | msl3-/msl3+ | 1    | 26.1455                 | 48.078                        | 1.000                             | 0.000     |                  |                 |                      |
|          |             | 2    | 26.1633                 | 47.750                        | 1.000                             | 0.000     |                  |                 |                      |
|          | msl3-/msl3- | 1    | 24.995                  | 74.796                        |                                   |           |                  |                 |                      |
|          |             | 2    | 25.335                  | 65.635                        |                                   |           |                  |                 |                      |
| mir-314  | msl3-/msl3+ | 1    | 21.1699                 | 35123.558                     | 0.350                             | -1.514    | -1.441           | 0.104           | 0.0003               |
|          |             | 2    | 21.2272                 | 33969.861                     | 0.388                             | -1.367    |                  |                 |                      |
|          | msl3-/msl3- | 1    | 22.213                  | 19128.386                     |                                   |           |                  |                 |                      |
|          |             | 2    | 22.307                  | 18104.321                     |                                   |           |                  |                 |                      |
| mir-981  | msl3-/msl3+ | 1    | 29.5758                 | 476.005                       | 0.655                             | -0.609    | -0.290           | 0.452           | 0.1481               |
|          |             | 2    | 30.2449                 | 359.989                       | 1.021                             | 0.030     |                  |                 |                      |
|          | msl3-/msl3- | 1    | 29.529                  | 485.377                       |                                   |           |                  |                 |                      |
|          |             | 2    | 29.433                  | 505.205                       |                                   |           |                  |                 |                      |
| mir-13b  | msl3-/msl3+ | 1    | 21.4858                 | 344.693                       | 0.540                             | -0.889    | -0.905           | 0.022           | 0.0079               |
|          |             | 2    | 21.5918                 | 325.964                       | 0.528                             | -0.921    |                  |                 |                      |
|          | msl3-/msl3- | 1    | 21.817                  | 289.481                       |                                   |           |                  |                 |                      |
|          |             | 2    | 22.199                  | 236.640                       |                                   |           |                  |                 |                      |
| mir-100  | msl3-/msl3+ | 1    | 26.8667                 | 291.331                       | 0.208                             | -2.262    | -2.062           | 0.284           | 0.0032               |
|          |             | 2    | 27.1654                 | 255.822                       | 0.275                             | -1.861    |                  |                 |                      |
|          | msl3-/msl3- | 1    | 29.455                  | 94.471                        |                                   |           |                  |                 |                      |
|          |             | 2    | 29.398                  | 96.819                        |                                   |           |                  |                 |                      |
| mir-1013 | msl3-/msl3+ | 1    | 29.240                  | 142.324                       | 0.573                             | -0.803    | -0.610           | 0.273           | 0.0861               |
|          |             | 2    | 28.286                  | 126.568                       | 0.749                             | -0.417    |                  |                 |                      |
|          | msl3-/msl3- | 1    | 29.365                  | 126.899                       |                                   |           |                  |                 |                      |
|          |             | 2    | 29.391                  | 130.301                       |                                   |           |                  |                 |                      |
| U6       | msl3-/msl3+ | 1    | 17.259                  | 307.518                       | 0.601                             | -0.734    | -1.024           | 0.410           | 0.0125               |
|          |             | 2    | 17.538                  | 512.989                       | 0.402                             | -1.314    |                  |                 |                      |
|          | msl3-/msl3- | 1    | 17.532                  | 287.625                       |                                   |           |                  |                 |                      |
|          |             | 2    | 17.469                  | 283.612                       |                                   |           |                  |                 |                      |

a-e as in Table S11.

**TABLE S15:** Abundance of miRNAs in *mle* mutant salivary glands

|         | Genotype  | Exp. | Average Ct <sup>a</sup> | Corrected amount <sup>b</sup> | Fold Difference (FD) <sup>c</sup> | log <sub>2</sub> (FD) | Average log <sub>2</sub> (FD) | SD <sup>d</sup> | p value <sup>e</sup> |
|---------|-----------|------|-------------------------|-------------------------------|-----------------------------------|-----------------------|-------------------------------|-----------------|----------------------|
| Dspt4   | mle-/mle+ | 1    | 24.693                  | 102.093                       | 1.000                             | 0.000                 |                               |                 |                      |
|         |           | 2    | 24.533                  | 100.668                       | 1.000                             | 0.000                 |                               |                 |                      |
|         | mle-/mle- | 1    | 23.901                  | 170.434                       |                                   |                       |                               |                 |                      |
|         |           | 2    | 23.827                  | 158.044                       |                                   |                       |                               |                 |                      |
| mir-283 | mle-/mle+ | 1    | 25.142                  | 100.816                       | 0.740                             | -0.435                | -0.430                        | 0.008           | 0.0040               |
|         |           | 2    | 24.812                  | 102.914                       | 0.745                             | -0.425                |                               |                 |                      |
|         | mle-/mle- | 1    | 24.788                  | 124.474                       |                                   |                       |                               |                 |                      |
|         |           | 2    | 24.510                  | 120.380                       |                                   |                       |                               |                 |                      |
| mir-304 | mle-/mle+ | 1    | 30.746                  | 96.522                        | 0.636                             | -0.652                | -0.739                        | 0.123           | 0.0031               |
|         |           | 2    | 31.004                  | 99.139                        | 0.564                             | -0.826                |                               |                 |                      |
|         | mle-/mle- | 1    | 30.568                  | 102.559                       |                                   |                       |                               |                 |                      |
|         |           | 2    | 31.168                  | 87.778                        |                                   |                       |                               |                 |                      |
| mir-12  | mle-/mle+ | 1    | 21.652                  | 101.133                       | 0.532                             | -0.910                | -0.946                        | 0.051           | 0.0003               |
|         |           | 2    | 21.533                  | 100.745                       | 0.506                             | -0.983                |                               |                 |                      |
|         | mle-/mle- | 1    | 21.869                  | 89.833                        |                                   |                       |                               |                 |                      |
|         |           | 2    | 21.882                  | 80.045                        |                                   |                       |                               |                 |                      |
| mir-979 | mle-/mle+ | 1    | 36.290                  | 101.068                       | 0.730                             | -0.454                | -0.635                        | 0.257           | 0.0203               |
|         |           | 2    | 35.292                  | 102.616                       | 0.568                             | -0.817                |                               |                 |                      |
|         | mle-/mle- | 1    | 36.064                  | 123.209                       |                                   |                       |                               |                 |                      |
|         |           | 2    | 35.753                  | 91.460                        |                                   |                       |                               |                 |                      |
| mir-210 | mle-/mle+ | 1    | 29.642                  | 107.507                       | 0.782                             | -0.355                | -0.182                        | 0.244           | 0.2301               |
|         |           | 2    | 29.573                  | 109.561                       | 0.994                             | -0.009                |                               |                 |                      |
|         | mle-/mle- | 1    | 29.288                  | 140.360                       |                                   |                       |                               |                 |                      |
|         |           | 2    | 29.094                  | 170.943                       |                                   |                       |                               |                 |                      |
| U6      | mle-/mle+ | 1    | 18.185                  | 99.069                        | 0.883                             | -0.180                | 0.098                         | 0.393           | 0.3556               |
|         |           | 2    | 18.095                  | 99.106                        | 1.298                             | 0.376                 |                               |                 |                      |
|         | mle-/mle- | 1    | 17.555                  | 146.012                       |                                   |                       |                               |                 |                      |
|         |           | 2    | 17.022                  | 201.962                       |                                   |                       |                               |                 |                      |

a-e as in Table S11.

**TABLE S16:** Abundance of miRNAs in *mle* mutant L3 larvae

|         | Genotype  | Exp. | Average Ct <sup>a</sup> | Corrected amount <sup>b</sup> | Fold Difference (FD) <sup>c</sup> | log2 (FD) | Average log2(FD) | SD <sup>d</sup> | p value <sup>e</sup> |
|---------|-----------|------|-------------------------|-------------------------------|-----------------------------------|-----------|------------------|-----------------|----------------------|
| Dspt4   | mle-/mle+ | 1    | 25.034                  | 81.970                        | 1.000                             | 0.000     |                  |                 |                      |
|         |           | 2    | 24.991                  | 76.150                        | 1.000                             | 0.000     |                  |                 |                      |
|         | mle-/mle- | 1    | 25.047                  | 81.265                        |                                   |           |                  |                 |                      |
|         |           | 2    | 24.697                  | 90.724                        |                                   |           |                  |                 |                      |
| mir-283 | mle-/mle+ | 1    | 26.352                  | 48.723                        | 0.807                             | -0.309    | -0.165           | 0.204           | 0.2143               |
|         |           | 2    | 26.170                  | 46.630                        | 0.986                             | -0.021    |                  |                 |                      |
|         | mle-/mle- | 1    | 26.717                  | 38.996                        |                                   |           |                  |                 |                      |
|         |           | 2    | 25.887                  | 54.769                        |                                   |           |                  |                 |                      |
| mir-304 | mle-/mle+ | 1    | 33.859                  | 16.253                        | 1.264                             | 0.338     | 0.117            | 0.313           | 0.2913               |
|         |           | 2    | 33.412                  | 15.797                        | 0.930                             | -0.104    |                  |                 |                      |
|         | mle-/mle- | 1    | 33.445                  | 20.368                        |                                   |           |                  |                 |                      |
|         |           | 2    | 33.277                  | 17.510                        |                                   |           |                  |                 |                      |
| mir-12  | mle-/mle+ | 1    | 24.132                  | 19.072                        | 0.892                             | -0.165    | -0.164           | 0.002           | 0.0126               |
|         |           | 2    | 24.135                  | 18.169                        | 0.894                             | -0.162    |                  |                 |                      |
|         | mle-/mle- | 1    | 24.311                  | 16.868                        |                                   |           |                  |                 |                      |
|         |           | 2    | 24.037                  | 19.341                        |                                   |           |                  |                 |                      |
| mir-979 | mle-/mle+ | 1    | 32.007                  | 1533.669                      | 1.972                             | 0.980     | 0.550            | 0.607           | 0.3187               |
|         |           | 2    | 31.470                  | 404.038                       | 1.088                             | 0.121     |                  |                 |                      |
|         | mle-/mle- | 1    | 30.972                  | 2998.693                      |                                   |           |                  |                 |                      |
|         |           | 2    | 30.760                  | 523.538                       |                                   |           |                  |                 |                      |
| mir-210 | mle-/mle+ | 1    | 26.990                  | 1098.538                      | 1.579                             | 0.659     | 0.484            | 0.247           | 0.3002               |
|         |           | 2    | 26.722                  | 2357.685                      | 1.239                             | 0.309     |                  |                 |                      |
|         | mle-/mle- | 1    | 26.467                  | 1719.262                      |                                   |           |                  |                 |                      |
|         |           | 2    | 26.347                  | 3479.985                      |                                   |           |                  |                 |                      |
| U6      | mle-/mle+ | 1    | 16.909                  | 227.810                       | 1.506                             | 0.591     | 0.559            | 0.046           | 0.3274               |
|         |           | 2    | 16.978                  | 208.576                       | 1.440                             | 0.526     |                  |                 |                      |
|         | mle-/mle- | 1    | 16.296                  | 340.231                       |                                   |           |                  |                 |                      |
|         |           | 2    | 16.160                  | 357.836                       |                                   |           |                  |                 |                      |

a-e as in Table S11.

**Table S17: Levels of let-7 miRNA in adult females and males**

| Tissue              |       | $C_T$ let-7<br>± StDev | $C_T$ 2SrRNA<br>± StDev | $\Delta C_T$ ( $\Delta C_T$<br>let-7 - $\Delta C_T$<br>2SrRNA) <sup>a</sup> | $\Delta\Delta C_T$ ( $\Delta C_T$ -<br>$\Delta C_T$ control) <sup>b</sup> | Average<br>$\Delta\Delta C_T$ ±<br>StDev | Fold<br>Difference <sup>c</sup>                     |
|---------------------|-------|------------------------|-------------------------|-----------------------------------------------------------------------------|---------------------------------------------------------------------------|------------------------------------------|-----------------------------------------------------|
| Female<br>carcasses | Exp 1 | 25.33±0.30             | 6.14±0.24               | 19.19±0.39                                                                  | 0.00±0.39                                                                 | 0.00±0.28                                | 1.00<br>(0.82 - 1.22)                               |
|                     | Exp 2 | 26.35±0.30             | 8.29±0.36               | 18.06±0.47                                                                  | 0.00±0.47                                                                 |                                          |                                                     |
| Germlaria           | Exp 1 | 22.18±0.18             | 6.29±0.09               | 15.90±0.20                                                                  | 3.29±0.20                                                                 | -2.24±0.11                               | 4.72<br>(4.38 - 5.09)<br>p=7.76x10 <sup>-6***</sup> |
|                     | Exp 2 | 22.35±0.05             | 7.72±0.11               | 14.63±0.12                                                                  | 3.43±0.12                                                                 |                                          |                                                     |
| Male<br>carcasses   | Exp 1 | 22.71±0.11             | 7.10±0.03               | 15.61±0.12                                                                  | 3.58±0.12                                                                 | -1.92±0.09                               | 3.79<br>(3.57 - 4.02)<br>p=1.55x10 <sup>-6***</sup> |
|                     | Exp 2 | 23.68±0.08             | 7.80±0.12               | 15.88±0.14                                                                  | 2.18±0.14                                                                 |                                          |                                                     |
| Testes              | Exp 1 | 21.14±0.26             | 6.56±0.03               | 14.58±0.26                                                                  | 4.61±0.26                                                                 | -2.89±0.12                               | 7.43<br>(6.84 - 8.07)<br>p=7.73x10 <sup>-8***</sup> |
|                     | Exp 2 | 22.40±0.05             | 8.41±0.09               | 13.99±0.10                                                                  | 4.07±0.10                                                                 |                                          |                                                     |

a:  $\Delta C_T$  was determined by subtracting the average 2SrRNA  $C_T$  value from the average Experimental  $C_T$  value. The standard deviation of the difference is calculated from the standard deviation of the Experimental and 2SrRNA values using the formula  $s = \sqrt{(s_1^2 + s_2^2)}$  where s = standard deviation

b:  $\Delta\Delta C_T$  is calculated by subtracting the  $\Delta C_T$  control value ( $\Delta C_T$  of female carcasses). The standard deviation is the same as for  $\Delta C_T$

c: the fold difference between the Experimental Sample and the control is calculated by:  $2^{\pm\Delta\Delta C_T}$  with  $\Delta\Delta C_T$  -s and  $\Delta\Delta C_T$  -s where s is the standard deviation of  $\Delta\Delta C_T$  value. The fold difference of the experimental values was compared to the respective control. P-value was calculated using the two tailed Students t-test. \*p<0.05. \*\*p<0.005. \*\*\*p<0.0005

**Table S18: Levels of sex specific mRNAs in  $\Delta let-7$  females and males**

| Genotype |                                             | $C_T$ <i>SxIF</i><br>$\pm$ StDev | $C_T$ <i>RpL32</i><br>$\pm$ StDev | $\Delta C_T$ ( $\Delta C_T$<br><i>SxIF</i> - $\Delta C_T$<br><i>RpL32</i> ) <sup>a</sup> | $\Delta\Delta C_T$ ( $\Delta C_T$ -<br>$\Delta C_T$ <sub>control</sub> ) <sup>b</sup> | Fold Difference <sup>c</sup>                      |
|----------|---------------------------------------------|----------------------------------|-----------------------------------|------------------------------------------------------------------------------------------|---------------------------------------------------------------------------------------|---------------------------------------------------|
| Females  | <b>Control:</b><br><i>let-7-C</i><br>Rescue | 16.15 $\pm$ 0.22                 | 11.32 $\pm$ 0.12                  | 4.83 $\pm$ 0.25                                                                          | 0.00 $\pm$ 0.25                                                                       | 1.00 (0.840-1.190)                                |
|          | <b><math>\Delta let-7</math></b>            | 15.95 $\pm$ 0.03                 | 11.16 $\pm$ 0.09                  | 4.78 $\pm$ 0.25                                                                          | -0.05 $\pm$ 0.09                                                                      | 1.033 (0.969-1.102)<br>p=0.70                     |
| Males    | <b>Control:</b><br><i>let-7-C</i><br>Rescue | 21.48 $\pm$ 0.12                 | 12.28 $\pm$ 0.16                  | 9.21 $\pm$ 0.20                                                                          | 0.00 $\pm$ 0.20                                                                       | 1.00 (0.872-1.147)                                |
|          | <b><math>\Delta let-7</math></b>            | 18.89 $\pm$ 0.09                 | 12.20 $\pm$ 0.22                  | 6.69 $\pm$ 0.23                                                                          | -2.51 $\pm$ 0.23                                                                      | 5.704 (4.853-6.705)<br>1.73x10 <sup>-4</sup> ***  |
| Genotype |                                             | $C_T$ <i>tra1</i><br>$\pm$ StDev | $C_T$ <i>RpL32</i><br>$\pm$ StDev | $\Delta C_T$ ( $\Delta C_T$<br><i>tra1</i> - $\Delta C_T$<br><i>RpL32</i> ) <sup>a</sup> | $\Delta\Delta C_T$ ( $\Delta C_T$ -<br>$\Delta C_T$ <sub>control</sub> ) <sup>b</sup> | Fold Difference <sup>c</sup>                      |
| Females  | <b>Control:</b><br><i>let-7-C</i><br>Rescue | 21.30 $\pm$ 0.13                 | 11.32 $\pm$ 0.12                  | 9.98 $\pm$ 0.17                                                                          | 0.00 $\pm$ 0.17                                                                       | 1.00 (0.886-1.129)                                |
|          | <b><math>\Delta let-7</math></b>            | 20.72 $\pm$ 0.14                 | 11.16 $\pm$ 0.09                  | 9.56 $\pm$ 0.16                                                                          | -0.42 $\pm$ 0.16                                                                      | 1.334 (1.190-1.495)<br>p=0.06                     |
| Males    | <b>Control:</b><br><i>let-7-C</i><br>Rescue | 29.84 $\pm$ 0.03                 | 12.28 $\pm$ 0.16                  | 17.57 $\pm$ 0.16                                                                         | 0.00 $\pm$ 0.16                                                                       | 1.00 (0.896-1.116)                                |
|          | <b><math>\Delta let-7</math></b>            | 29.66 $\pm$ 0.09                 | 12.20 $\pm$ 0.22                  | 17.46 $\pm$ 0.23                                                                         | -0.11 $\pm$ 0.23                                                                      | 1.079 (0.917-1.270)<br>p=0.40                     |
| Genotype |                                             | $C_T$ <i>DsxM</i><br>$\pm$ StDev | $C_T$ <i>RpL32</i><br>$\pm$ StDev | $\Delta C_T$ ( $\Delta C_T$<br><i>DsxM</i> - $\Delta C_T$<br><i>RpL32</i> ) <sup>a</sup> | $\Delta\Delta C_T$ ( $\Delta C_T$ -<br>$\Delta C_T$ <sub>control</sub> ) <sup>b</sup> | Fold Difference <sup>c</sup>                      |
| Females  | <b>Control:</b><br><i>let-7-C</i><br>Rescue | 25.23 $\pm$ 0.09                 | 11.32 $\pm$ 0.12                  | 13.90 $\pm$ 0.15                                                                         | 0.00 $\pm$ 0.15                                                                       | 1.00 (0.900-1.111)                                |
|          | <b><math>\Delta let-7</math></b>            | 25.69 $\pm$ 0.05                 | 11.16 $\pm$ 0.09                  | 14.52 $\pm$ 0.10                                                                         | 0.62 $\pm$ 0.10                                                                       | 0.649 (0.605-0.697)<br>p=1.83x10 <sup>-3</sup> ** |
| Males    | <b>Control:</b><br><i>let-7-C</i><br>Rescue | 17.89 $\pm$ 0.33                 | 12.28 $\pm$ 0.16                  | 5.61 $\pm$ 0.37                                                                          | 0.00 $\pm$ 0.37                                                                       | 1.00 (0.950-1.052)                                |
|          | <b><math>\Delta let-7</math></b>            | 17.94 $\pm$ 0.03                 | 12.20 $\pm$ 0.22                  | 5.74 $\pm$ 0.22                                                                          | 0.30 $\pm$ 0.17                                                                       | 0.914 (0.786-1.062)<br>0.75                       |

| Genotype |                                             | $C_T$ <i>Yp1</i><br>± StDev | $C_T$ <i>RpL32</i><br>± StDev | $\Delta C_T$ ( $\Delta C_T$<br><i>Yp1</i> - $\Delta C_T$<br><i>RpL32</i> ) <sup>a</sup> | $\Delta\Delta C_T$ ( $\Delta C_T$ -<br>$\Delta C_T$ control) <sup>b</sup> | Fold Difference <sup>c</sup>                      |
|----------|---------------------------------------------|-----------------------------|-------------------------------|-----------------------------------------------------------------------------------------|---------------------------------------------------------------------------|---------------------------------------------------|
| Females  | <b>Control:</b><br><i>let-7-C</i><br>Rescue | 10.33±0.07                  | 11.32±0.12                    | -1.00±0.14                                                                              | 0.00±0.14                                                                 | 1.00 (0.908-1.101)                                |
|          | <b><math>\Delta</math> <i>let-7</i></b>     | 12.93±0.10                  | 11.16±0.09                    | 1.77±0.13                                                                               | 2.76±0.13                                                                 | 0.147 (0.134-0.162)<br>p=3.29x10 <sup>-6***</sup> |
| Males    | <b>Control:</b><br><i>let-7-C</i><br>Rescue | 25.99±0.05                  | 12.28±0.16                    | 13.71±0.16                                                                              | 0.00±0.16                                                                 | 1.00 (0.894-1.119)                                |
|          | <b><math>\Delta</math> <i>let-7</i></b>     | 25.01±0.13                  | 12.20±0.22                    | 12.81±0.25                                                                              | -0.90±0.25                                                                | 1.867 (1.568-2.223)<br>p=9.85x10 <sup>-4**</sup>  |

a:  $\Delta C_T$  was determined by subtracting the average *RpL32*  $C_T$  value from the average Experimental  $C_T$  value. The standard deviation of the difference is calculated from the standard deviation of the Experimental and *RpL32* values using the formula  $s = \sqrt{(s_1^2 + s_2^2)}$  where s = standard deviation

b:  $\Delta\Delta C_T$  is calculated by subtracting the  $\Delta C_T$  control. The standard deviation is the same as for  $\Delta C_T$

c: the fold difference between the Experimental Sample and the control is calculated by:  $2^{-\Delta\Delta C_T}$  with  $\Delta\Delta C_T + s$  and  $\Delta\Delta C_T - s$  where s is the standard deviation of  $\Delta\Delta C_T$  value. The fold difference of the experimental values was compared to the respective control. P-value was calculated using the two tailed Students t-test. \*p<0.05, \*\*p<0.005. \*\*\*p<0.0005



**Table S19: *let-7* expression depends on ecdysone signaling in adult ovaries and testes**

|         | Genotype, conditions                       | $C_T$ <i>let-7</i> ± StDev <sup>a</sup> | $C_T$ <i>RpL32</i> ± StDev  | $\Delta C_T$ ( $\Delta C_T$ <i>let-7</i> - $\Delta C_T$ <i>RpL32</i> ) <sup>a</sup>  | $\Delta\Delta C_T$ ( $\Delta C_T$ - $\Delta C_T$ control) <sup>b</sup> | Fold Difference <sup>c</sup>                      | Relative change of <i>let-7</i> levels <sup>d</sup> |
|---------|--------------------------------------------|-----------------------------------------|-----------------------------|--------------------------------------------------------------------------------------|------------------------------------------------------------------------|---------------------------------------------------|-----------------------------------------------------|
| Females | <i>OregonR</i> , 4d at 18°C                | 25.88±0.16                              | 14.13±0.21                  | 11.74±0.06                                                                           | 0.00±0.06                                                              | 1.00<br>(0.96-1.04)                               | 1.00<br>(0.88-1.13)                                 |
|         | <i>OregonR</i> , 4d at 29°C                | 25.00±0.04                              | 14.39±0.17                  | 10.58±0.18                                                                           | -1.16±0.18                                                             | 2.24<br>(1.98-2.54)<br>p=2.01x10 <sup>-5***</sup> |                                                     |
|         | <i>ecd1<sup>ts 4210</sup></i> , 4d at 18°C | 24.07±0.04                              | 13.42±0.28                  | 10.65±0.05                                                                           | 0.00±0.05                                                              | 1.00<br>(0.97-1.03)                               | 0.38<br>(0.37-0.38)<br>p=2.44x10 <sup>-4***</sup>   |
|         | <i>ecd1<sup>ts 4210</sup></i> , 4d at 29°C | 24.80±0.15                              | 13.96±0.45                  | 10.92±0.001                                                                          | 0.27±0.001                                                             | 0.84<br>(0.84-0.84)<br>p=0.14                     |                                                     |
|         | Genotype, conditions                       | $C_T$ <i>let-7</i> ± StDev              | $C_T$ <i>S2rRNA</i> ± StDev | $\Delta C_T$ ( $\Delta C_T$ <i>let-7</i> - $\Delta C_T$ <i>S2rRNA</i> ) <sup>a</sup> | $\Delta\Delta C_T$ ( $\Delta C_T$ - $\Delta C_T$ control) <sup>b</sup> | Fold Difference <sup>c</sup>                      | Relative change of <i>let-7</i> levels <sup>d</sup> |
| Males   | <i>OregonR</i> , 4d at 18°C                | 22.90±0.03                              | 8.41±0.11                   | 14.49±0.13                                                                           | 0.00±0.13                                                              | 1.00<br>(0.91-1.09)                               | 1.00<br>(0.92-1.08)                                 |
|         | <i>OregonR</i> , 4d at 29°C                | 22.55±0.03                              | 8.35±0.12                   | 14.20±0.12                                                                           | -0.29±0.12                                                             | 1.23<br>(1.14-1.33)<br>p=0.02*                    |                                                     |
|         | <i>ecd1<sup>ts 4210</sup></i> , 4d at 18°C | 22.13±0.55                              | 8.33±0.09                   | 13.80±0.15                                                                           | 0.00±0.15                                                              | 1.00<br>(0.90-1.11)                               | 0.24<br>(0.23-0.25)<br>p=1.77x10 <sup>-4***</sup>   |
|         | <i>ecd1<sup>ts 4210</sup></i> , 4d at 29°C | 23.49±0.02                              | 7.87±0.11                   | 15.64±0.08                                                                           | 1.85±0.08                                                              | 0.29<br>(0.28-0.31)<br>p=3.59x10 <sup>-4***</sup> |                                                     |

a:  $\Delta C_T$  values were determined by subtracting the average *RpL32* or *2SrRNA*  $C_T$  value from the average Experimental  $C_T$  value. The standard deviation of the difference is calculated from the standard deviation of the Experimental and *RpL32* or *2SrRNA* values using the formula  $s = \sqrt{(s_1^2 + s_2^2)}$  where s = standard deviation

b:  $\Delta\Delta C_T$  is calculated by subtracting the  $\Delta C_T$  control value ( $\Delta C_T$  of the respective genotype at 18°C). The standard deviation is the same as for  $\Delta C_T$

c: the fold difference between the Experimental Sample and the control is calculated by:  $2^{-\Delta\Delta C_T}$  with  $\Delta\Delta C_T + s$  and  $\Delta\Delta C_T - s$  where s is the standard deviation of  $\Delta\Delta C_T$  value. The fold difference of the experimental values was compared to the respective control. P-value between  $\Delta C_T$  values of the experiments was calculated using the two tailed Students t-test

d: The relative changes of *let-7* levels were calculated by dividing the fold difference ranges of *ecd1<sup>ts</sup>* and *OrR*. Students T-test was used to compare the relative changes  
\*p<0.05, \*\*p<0.005

**Table S20: Levels of sex specific mRNAs are misregulated upon ecdysone deficit**

| Genotype, conditions |                                   | $C_T$ <i>DsxM</i> ± StDev | $C_T$ <i>Rpl32</i> ± StDev | $\Delta C_T$ ( $\Delta C_T$ <i>DsxM</i> - $\Delta C_T$ <i>Rpl32</i> ) <sup>a</sup> | $\Delta\Delta C_T$ ( $\Delta C_T$ - $\Delta C_T$ control) <sup>b</sup> | Fold Difference <sup>c</sup> |                                                  |
|----------------------|-----------------------------------|---------------------------|----------------------------|------------------------------------------------------------------------------------|------------------------------------------------------------------------|------------------------------|--------------------------------------------------|
| Females              | Control: <i>OrR</i>               | 18°C                      | 26.20±0.07                 | 15.40±0.20                                                                         | 10.80±0.21                                                             | 0.00±0.21                    | 1.00 (0.866-1.155)                               |
|                      | <i>OrR</i>                        | 29°C                      | 26.34±0.01                 | 13.95±0.03                                                                         | 12.39±0.03                                                             | 1.58±0.03                    | 0.334 (0.326-0.341)<br>p=3.73x10 <sup>-3**</sup> |
|                      | Control: <i>ecd1<sup>ts</sup></i> | 18°C                      | 26.41±0.07                 | 13.69±0.07                                                                         | 12.72±0.10                                                             | 0.00±0.10                    | 1.00 (0.935-1.070)                               |
|                      | <i>ecd1<sup>ts</sup></i>          | 29°C                      | 25.88±0.12                 | 14.36±0.07                                                                         | 11.52±0.14                                                             | -1.20±0.14                   | 2.299 (2.081-2.539)<br>2.59x10 <sup>-4***</sup>  |
| Males                | Control: <i>OrR</i>               | 18°C                      | 17.84±0.04                 | 15.67±0.15                                                                         | 2.17±0.16                                                              | 0.00±0.16                    | 1.00 (0.896-1.116)                               |
|                      | <i>OrR</i>                        | 29°C                      | 18.17±0.06                 | 15.45±0.29                                                                         | 2.72±0.30                                                              | 0.55±0.30                    | 0.681 (0.553-0.838)<br>p=0.06                    |
|                      | Control: <i>ecd1<sup>ts</sup></i> | 18°C                      | 18.40±0.02                 | 15.77±0.20                                                                         | 2.63±0.20                                                              | 0.00±0.20                    | 1.00 (0.868-1.152)                               |
|                      | <i>ecd1<sup>ts</sup></i>          | 29°C                      | 18.04±0.05                 | 14.60±0.14                                                                         | 3.45±0.25                                                              | 0.81±0.15                    | 0.569 (0.511-0.633)<br>p=7.97x10 <sup>-3*</sup>  |

| Genotype, conditions |                                   | $C_T$ <i>Esg</i> ± StDev | $C_T$ <i>Rpl32</i> ± StDev | $\Delta C_T$ ( $\Delta C_T$ <i>Esg</i> - $\Delta C_T$ <i>Rpl32</i> ) <sup>a</sup> | $\Delta\Delta C_T$ ( $\Delta C_T$ - $\Delta C_T$ control) <sup>b</sup> | Fold Difference <sup>c</sup> |                                                 |
|----------------------|-----------------------------------|--------------------------|----------------------------|-----------------------------------------------------------------------------------|------------------------------------------------------------------------|------------------------------|-------------------------------------------------|
| Females              | Control: <i>OrR</i>               | 18°C                     | 29.30±0.09                 | 15.40±0.20                                                                        | 13.90±0.22                                                             | 0.00±0.22                    | 1.00 (0.862-1.161)                              |
|                      | <i>OrR</i>                        | 29°C                     | 27.90±0.08                 | 13.95±0.03                                                                        | 13.94±0.09                                                             | 0.04±0.09                    | 0.970 (0.912-1.032)<br>p=0.81                   |
|                      | Control: <i>ecd1<sup>ts</sup></i> | 18°C                     | 24.39±0.28                 | 13.69±0.07                                                                        | 10.70±0.28                                                             | 0.00±0.28                    | 1.00 (0.821-1.218)                              |
|                      | <i>ecd1<sup>ts</sup></i>          | 29°C                     | 24.69±0.22                 | 14.36±0.07                                                                        | 10.33±0.24                                                             | -0.37±0.24                   | 1.293 (1.097-1.523)<br>p=0.07                   |
| Males                | Control: <i>OrR</i>               | 18°C                     | 26.86±0.05                 | 15.67±0.15                                                                        | 11.19±0.16                                                             | 0.00±0.16                    | 1.00 (0.894-1.119)                              |
|                      | <i>OrR</i>                        | 29°C                     | 27.48±0.00 <sub>3</sub>    | 15.45±0.29                                                                        | 12.03±0.29                                                             | 0.84±0.29                    | 0.559 (0.456-0.685)<br>p=0.55                   |
|                      | Control: <i>ecd1<sup>ts</sup></i> | 18°C                     | 25.89±0.02                 | 15.77±0.20                                                                        | 10.12±0.20                                                             | 0.00±0.20                    | 1.00 (0.868-1.152)                              |
|                      | <i>ecd1<sup>ts</sup></i>          | 29°C                     | 25.34±0.13                 | 14.60±0.14                                                                        | 10.75±0.20                                                             | 0.63±0.20                    | 0.648 (0.566-0.742)<br>p=8.77x10 <sup>-3*</sup> |

| Genotype, conditions |                                   | $C_T$ <i>SxIF11</i> ± StDev | $C_T$ <i>Rpl32</i> ± StDev | $\Delta C_T$ ( $\Delta C_T$ <i>SxIF11</i> - $\Delta C_T$ <i>Rpl32</i> ) <sup>a</sup> | $\Delta\Delta C_T$ ( $\Delta C_T$ - $\Delta C_T$ control) <sup>b</sup> | Fold Difference <sup>c</sup> |                                                  |
|----------------------|-----------------------------------|-----------------------------|----------------------------|--------------------------------------------------------------------------------------|------------------------------------------------------------------------|------------------------------|--------------------------------------------------|
| Females              | Control: <i>OrR</i>               | 18°C                        | 17.81±0.08                 | 15.40±0.20                                                                           | 2.41±0.21                                                              | 0.00±0.21                    | 1.00 (0.864-1.158)                               |
|                      | <i>OrR</i>                        | 29°C                        | 15.96±0.16                 | 13.95±0.03                                                                           | 2.00±0.16                                                              | -0.41±0.16                   | 1.330 (1.189-1.487)<br>p=5.00x10 <sup>-2*</sup>  |
|                      | Control: <i>ecd1<sup>ts</sup></i> | 18°C                        | 16.02±0.04                 | 13.69±0.07                                                                           | 2.33±0.08                                                              | 0.00±0.08                    | 1.00 (0.947-1.056)                               |
|                      | <i>ecd1<sup>ts</sup></i>          | 29°C                        | 16.18±0.16                 | 14.36±0.07                                                                           | 1.82±0.17                                                              | -0.51±0.17                   | 1.424 (1.262-1.607)<br>p=1.64x10 <sup>-3**</sup> |
| Males                | Control: <i>OrR</i>               | 18°C                        | 21.05±0.12                 | 15.67±0.15                                                                           | 5.38±0.20                                                              | 0.00±                        | 1.00 (0.873-1.146)                               |
|                      | <i>OrR</i>                        | 29°C                        | 21.44±0.07                 | 15.45±0.29                                                                           | 5.99±0.30                                                              | 0.61±                        | 0.653 (0.530-0.805)<br>p=0.15                    |
|                      | Control: <i>ecd1<sup>ts</sup></i> | 18°C                        | 22.24±0.12                 | 15.77±0.20                                                                           | 6.47±0.24                                                              | 0.00±                        | 1.00 (0.848-1.179)                               |
|                      | <i>ecd1<sup>ts</sup></i>          | 29°C                        | 19.38±0.07                 | 14.60±0.14                                                                           | 4.78±0.16                                                              | -1.69±                       | 3.222 (2.883-3.600)<br>p=9.13x10 <sup>-3**</sup> |

| Genotype, conditions |                                   | $C_T$ <i>tra1</i> ± StDev | $C_T$ <i>Rpl32</i> ± StDev | $\Delta C_T$ ( $\Delta C_T$ <i>tra1</i> - $\Delta C_T$ <i>Rpl32</i> ) <sup>a</sup> | $\Delta\Delta C_T$ ( $\Delta C_T$ - $\Delta C_T$ control) <sup>b</sup> | Fold Difference <sup>c</sup> |                                                      |
|----------------------|-----------------------------------|---------------------------|----------------------------|------------------------------------------------------------------------------------|------------------------------------------------------------------------|------------------------------|------------------------------------------------------|
| Females              | Control: <i>OrR</i>               | 18°C                      | 21.04±0.05                 | 15.40±0.20                                                                         | 5.64±0.20                                                              | 0.00±0.20                    | 1.00 (0.868-1.152)                                   |
|                      | <i>OrR</i>                        | 29°C                      | 19.87±0.11                 | 13.95±0.03                                                                         | 5.92±0.11                                                              | 0.28±0.11                    | 0.826 (0.765-0.891)<br>p=0.14                        |
|                      | Control: <i>ecd1<sup>ts</sup></i> | 18°C                      | 20.01±0.08                 | 13.69±0.07                                                                         | 6.32±0.11                                                              | 0.00±0.11                    | 1.00 (0.927-1.079)                                   |
|                      | <i>ecd1<sup>ts</sup></i>          | 29°C                      | 20.69±0.11                 | 14.36±0.07                                                                         | 6.33±0.13                                                              | 0.008±0.13                   | 0.994 (0.909-1.088)<br>p=0.93                        |
| Males                | Control: <i>OrR</i>               | 18°C                      | 28.84±0.09                 | 15.67±0.15                                                                         | 13.18±0.18                                                             | 0.00±0.18                    | 1.00 (0.885-1.129)                                   |
|                      | <i>OrR</i>                        | 29°C                      | 28.67±0.05                 | 15.45±0.29                                                                         | 13.22±0.30                                                             | 0.05±0.30                    | 0.969 (0.789-1.190)<br>p=0.73                        |
|                      | Control: <i>ecd1<sup>ts</sup></i> | 18°C                      | 28.69±0.12                 | 15.77±0.20                                                                         | 12.92±0.23                                                             | 0.00±0.23                    | 1.00 (0.850-1.176)                                   |
|                      | <i>ecd1<sup>ts</sup></i>          | 29°C                      | 23.68±0.06                 | 14.60±0.14                                                                         | 9.08±0.16                                                              | -3.84±0.16                   | 14.277 (12.801-15.924)<br>p=1.76x10 <sup>-5***</sup> |

| Genotype, conditions |                                      | $C_T$ <i>Yp1</i><br>± StDev | $C_T$ <i>Rpl32</i><br>± StDev | $\Delta C_T$ ( $\Delta C_T$<br><i>Yp1</i> - $\Delta C_T$<br><i>Rpl32</i> ) <sup>a</sup> | $\Delta\Delta C_T$<br>( $\Delta C_T$ - $\Delta C_T$<br>control) <sup>b</sup> | Fold Difference <sup>c</sup> |                                                         |
|----------------------|--------------------------------------|-----------------------------|-------------------------------|-----------------------------------------------------------------------------------------|------------------------------------------------------------------------------|------------------------------|---------------------------------------------------------|
| Females              | Control:<br><i>OrR</i>               | 18°C                        | 12.33±0.14                    | 15.40±0.20                                                                              | -3.07±0.24                                                                   | 0.00±0.24                    | 1.00 (0.846-1.182)                                      |
|                      | <i>OrR</i>                           | 29°C                        | 11.21±0.23                    | 13.95±0.03                                                                              | -2.74±0.23                                                                   | 0.33±0.23                    | 0.794 (0.678-0.930)<br>p=0.12                           |
|                      | Control:<br><i>ecd1<sup>ts</sup></i> | 18°C                        | 10.86±0.31                    | 13.69±0.07                                                                              | -2.82±0.32                                                                   | 0.00±0.32                    | 1.00 (0.800-1.249)                                      |
|                      | <i>ecd1<sup>ts</sup></i>             | 29°C                        | 11.24±0.20                    | 14.36±0.07                                                                              | -3.12±0.21                                                                   | -0.30±0.21                   | 1.231 (1.061-1.428)<br>p=0.15                           |
| Males                | Control:<br><i>OrR</i>               | 18°C                        | 26.15±0.11                    | 15.67±0.15                                                                              | 10.48±0.19                                                                   | 0.00±0.19                    | 1.00 (0.876-1.142)                                      |
|                      | <i>OrR</i>                           | 29°C                        | 25.57±0.03                    | 15.45±0.29                                                                              | 10.12±0.29                                                                   | -0.36±0.29                   | 1.285 (1.048-1.576)<br>p=0.14                           |
|                      | Control:<br><i>ecd1<sup>ts</sup></i> | 18°C                        | 24.63±0.08                    | 15.77±0.20                                                                              | 8.86±0.22                                                                    | 0.00±0.22                    | 1.00 (0.86-1.163)                                       |
|                      | <i>ecd1<sup>ts</sup></i>             | 29°C                        | 16.76±0.06                    | 14.60±0.14                                                                              | 2.16±0.16                                                                    | -6.702±0.16                  | 104.080 (93.395-115.987)<br>p=3.22x10 <sup>-6</sup> *** |

a:  $\Delta C_T$  was determined by subtracting the average *Rpl32*  $C_T$  value from the average Experimental  $C_T$  value. Since the same set of samples was used for all PCRs, the same *Rpl32*  $C_T$  values are used as internal control. The standard deviation of the difference is calculated from the standard deviation of the Experimental and *Rpl32* values using the formula  $s = \sqrt{(s_1^2 + s_2^2)}$  where  $s$  = standard deviation.

b:  $\Delta\Delta C_T$  is calculated by subtracting the  $\Delta C_T$  control value ( $\Delta C_T$  of the sample of the respective sex and genotype at 18°C). The standard deviation is the same as for  $\Delta C_T$ .

c: the fold difference between the Experimental Sample and the control is calculated by:  $2^{-\Delta\Delta C_T}$  with  $\Delta\Delta C_T + s$  and  $\Delta\Delta C_T - s$  where  $s$  is the standard deviation of  $\Delta\Delta C_T$  value. The fold difference of the experimental values was compared to the respective control. P-value was calculated using the two tailed Students t-test. \*p<0.05, \*\*p<0.005. \*\*\*p<0.0005.

**Table S21. Ecdysteroid deficit leads to differentiation defects in the CySC lineage cells in adult testes**

| Genotype, conditions                                       | Clustering of somatic cyst cells |           |            |         | Appearance of epithelium-like clusters |        |         |           |
|------------------------------------------------------------|----------------------------------|-----------|------------|---------|----------------------------------------|--------|---------|-----------|
|                                                            | < 5 cells                        | ≥ 5 cells | > 10 cells | P value | None                                   | Apical | Lateral | P value   |
| Control:<br><i>ecd</i> <sup>1ts</sup> ,<br>5 days, 18°     | 40%                              | 60%       | 0%         |         | 100%                                   | 0%     | 0%      |           |
| <i>ecd</i> <sup>1ts</sup> ,<br>5 days, 29°                 | 7%                               | 57%       | 36%        | 0.0368* | 43%                                    | 43%    | 14%     | 0.0137*   |
| Control:<br><i>ecd</i> <sup>1ts</sup> ,<br>11 days,<br>18° | 50%                              | 50%       | 0%         |         | 83%                                    | 17%    | 0%      |           |
| <i>ecd</i> <sup>1ts</sup> ,<br>11 days,<br>29°             | 17%                              | 8%        | 75%        | 0.0113* | 0%                                     | 50%    | 50%     | 0.0001*** |

To calculate the significance two-way tables and chi-squared test with 2 degrees of freedom were used. The frequencies of the testes with the somatic cell clustering phenotype (<5, ≥ 5 or >10 somatic cell in the cluster) and the frequencies of the testes with epithelial sheets (none, apical or lateral) acquired by induction of ecdysone deficit for 5d or 11d at the restrictive temperature (29°) were compared to the frequencies of the same phenotypes in flies with the same genotype but kept for the same periods of time (5d or 11d) at the permissive temperature (18°). N=10-20 testes for each genotype. \*p<0.05, \*\*p<0.005. \*\*\*p<0.0005.

TABLE S22: Ranked abundance of miRNAs in each sexed library (Complete list)

| Chrom | Late embryo Lymphoid Cells |          |           |          | L3 Larvae Salivary Glands |          |                |          | Adult Head |          |            |          | Adult Body |          |            |          | Adult Gonads |          |           |          |
|-------|----------------------------|----------|-----------|----------|---------------------------|----------|----------------|----------|------------|----------|------------|----------|------------|----------|------------|----------|--------------|----------|-----------|----------|
|       | miRNA                      | S2 M (%) | miRNA     | Kc F (%) | S. Gland M (%)            |          | S. Gland F (%) |          | Head M (%) |          | Head F (%) |          | Body M (%) |          | Body F (%) |          | Testis       |          |           |          |
|       |                            |          |           |          | miRNA                     | (%)      | miRNA          | (%)      | miRNA      | (%)      | miRNA      | (%)      | miRNA      | (%)      | miRNA      | (%)      | miRNA        | (%)      | miRNA     | (%)      |
| chr2R | mir-14                     | 38.35286 | mir-14    | 29.10042 | mir-8                     | 32.42188 | mir-8          | 35.66808 | mir-8      | 14.57004 | mir-8      | 11.43554 | mir-1      | 25.56082 | mir-1      | 26.75240 | mir-12       | 16.87054 | mir-989   | 18.37262 |
| chr2R | mir-184                    | 11.34536 | mir-184   | 16.37821 | mir-263a                  | 10.45437 | mir-12         | 8.49222  | mir-1      | 9.99692  | mir-1      | 8.17673  | mir-8      | 23.01229 | mir-8      | 25.64450 | mir-8        | 15.35016 | bantam    | 11.43364 |
| chr3L | bantam                     | 7.44158  | mir-263a  | 4.44288  | mir-375                   | 7.52355  | bantam         | 7.75277  | bantam     | 8.19215  | mir-276a   | 7.62653  | bantam     | 12.55761 | bantam     | 9.78819  | mir-305      | 5.03802  | mir-8     | 9.30021  |
| chr3R | mir-996                    | 4.85129  | mir-8     | 4.14932  | mir-12                    | 6.25415  | mir-375        | 6.71742  | mir-276a   | 5.81087  | bantam     | 7.13572  | mir-276a   | 4.65975  | mir-276    | 5.02046  | mir-959      | 4.67717  | mir-2a    | 7.72512  |
| chr3R | mir-279                    | 3.46812  | bantam    | 4.07801  | mir-304                   | 5.72874  | mir-282        | 6.30407  | mir-276    | 5.39112  | mir-210    | 4.99725  | mir-277    | 3.91230  | mir-276a   | 4.27473  | mir-2a       | 3.85408  | mir-318   | 7.24950  |
| chr3R | mir-11                     | 3.29268  | mir-34    | 3.39610  | mir-275                   | 5.19227  | mir-304        | 6.00679  | mir-277    | 4.66334  | mir-277    | 4.90334  | mir-276    | 2.46689  | mir-2a     | 2.93279  | let-7        | 3.13374  | mir-184   | 6.40474  |
| chr3R | mir-34                     | 2.93382  | mir-988   | 3.37195  | bantam                    | 4.71150  | bantam         | 4.82103  | mir-184    | 4.05515  | mir-184    | 4.17368  | mir-2a     | 2.19543  | mir-277    | 2.68239  | mir-34       | 3.10799  | mir-996   | 5.91867  |
| chr2R | mir-988                    | 2.89604  | mir-317   | 3.14547  | mir-2a                    | 3.04332  | mir-11         | 2.45542  | mir-34     | 3.57697  | mir-34     | 3.61372  | mir-996    | 1.54310  | mir-989    | 1.76169  | mir-282      | 3.00171  | mir-2b    | 3.30079  |
| chr3L | mir-282                    | 2.84211  | mir-2b    | 3.10880  | mir-305                   | 2.73388  | mir-13b        | 2.44753  | mir-2b     | 3.41702  | mir-14     | 3.20424  | let-7      | 1.48826  | mir-282    | 1.68466  | mir-964      | 2.74226  | mir-994   | 3.00554  |
| chr3R | mir-252                    | 2.78986  | mir-276   | 2.30014  | mir-2b                    | 2.43359  | mir-305        | 1.92719  | mir-2a     | 3.22916  | mir-285    | 2.95344  | mir-9a     | 1.48086  | mir-31a    | 1.48123  | mir-277      | 2.58692  | mir-275   | 2.61547  |
| chr3R | mir-13b                    | 2.42533  | mir-996   | 2.29723  | mir-13b                   | 1.98678  | mir-2a         | 1.91021  | mir-285    | 3.21797  | mir-2a     | 2.92097  | mir-14     | 1.34500  | mir-2b     | 1.20586  | mir-11       | 2.50748  | mir-13b   | 2.19972  |
| chr2L | mir-2b                     | 2.09460  | mir-279   | 2.25699  | mir-11                    | 1.91047  | mir-2b         | 1.55036  | mir-14     | 2.46292  | mir-2b     | 2.73268  | mir-31a    | 1.27792  | mir-9a     | 1.18265  | mir-978      | 2.29276  | mir-9b    | 2.19650  |
| chr3R | mir-317                    | 1.92167  | mir-13b   | 2.19551  | mir-283                   | 1.78685  | mir-283        | 1.53792  | mir-210    | 2.26200  | mir-276    | 2.17511  | mir-282    | 1.19888  | mir-996    | 1.08039  | mir-977      | 2.19598  | mir-263a  | 1.46179  |
| chr2L | mir-276a                   | 1.91873  | mir-11    | 2.08551  | mir-282                   | 1.58233  | mir-996        | 1.19958  | mir-124    | 2.35303  | mir-274    | 2.60279  | mir-12     | 1.09602  | let-7      | 1.07663  | mir-274      | 2.14935  | mir-79    | 1.39712  |
| chr3L | mir-2a                     | 1.64508  | mir-9b    | 1.77317  | mir-996                   | 1.13781  | mir-276        | 1.15280  | mir-13b    | 2.20357  | let-7      | 2.39044  | mir-13b    | 1.08115  | mir-184    | 1.05731  | mir-976      | 2.04009  | mir-282   | 1.37663  |
| chr3L | mir-276                    | 0.94940  | mir-276a  | 1.62248  | mir-308                   | 1.06112  | mir-308        | 0.99607  | let-7      | 1.62439  | mir-124    | 2.28452  | mir-10     | 0.98418  | mir-13b    | 0.95693  | mir-9a       | 1.85601  | mir-11    | 1.34088  |
| chr2R | mir-8                      | 0.84006  | mir-12    | 1.57688  | mir-14                    | 0.99282  | mir-998        | 0.99113  | mir-1000   | 1.47162  | mir-252    | 1.76221  | mir-2b     | 0.93727  | mir-10     | 0.83951  | mir-983      | 1.82510  | mir-34    | 1.31839  |
| chr3R | mir-995                    | 0.78928  | mir-305   | 1.53819  | mir-998                   | 0.81005  | mir-276a       | 0.73590  | mir-263a   | 1.36504  | mir-13b    | 1.62700  | mir-281-1  | 0.90548  | mir-11     | 0.75229  | mir-9b       | 1.82375  | mir-305   | 1.08218  |
| chr2R | mir-277                    | 0.77711  | mir-2a    | 1.44698  | mir-276                   | 0.74252  | mir-79         | 0.69444  | mir-987    | 1.15961  | mir-9a     | 1.53286  | mir-304    | 0.88408  | mir-14     | 0.73860  | mir-14       | 1.82239  | mir-9c    | 0.93878  |
| chr3R | mir-305                    | 0.69694  | mir-306   | 0.91420  | mir-34                    | 0.62690  | mir-995        | 0.63562  | mir-252    | 1.13643  | mir-996    | 1.28801  | mir-184    | 0.78891  | mir-281-1  | 0.71807  | mir-988      | 1.03719  | mir-12    | 0.91588  |
| chr3R | mir-998                    | 0.65344  | mir-998   | 0.88647  | mir-995                   | 0.62232  | mir-34         | 0.58884  | mir-274    | 1.09402  | mir-263a   | 1.21244  | mir-279    | 0.74956  | mir-31a    | 0.59703  | mir-2b       | 1.64237  | mir-33    | 0.83634  |
| chr2L | mir-306                    | 0.52465  | mir-9c    | 0.84265  | mir-79                    | 0.61202  | mir-14         | 0.52468  | mir-7      | 1.08173  | mir-1000   | 1.20431  | mir-11     | 0.74272  | mir-279    | 0.55596  | mir-960      | 1.47375  | mir-995   | 0.76444  |
| chr2L | mir-9b                     | 0.51688  | mir-995   | 0.83930  | mir-9a                    | 0.58760  | mir-275        | 0.51086  | mir-9a     | 0.95078  | mir-31a    | 1.03433  | mir-305    | 0.71838  | mir-263a   | 0.52228  | mir-13b      | 1.41302  | mir-14    | 0.63107  |
| chr2L | mir-79                     | 0.42874  | mir-79    | 0.80867  | mir-9b                    | 0.47962  | mir-33         | 0.44533  | mir-929    | 0.94692  | mir-11     | 1.00219  | mir-79     | 0.62466  | mir-305    | 0.49544  | mir-317      | 1.21701  | mir-1     | 0.62224  |
| chr2L | mir-2a                     | 0.42286  | mir-282   | 0.68950  | mir-33                    | 0.47275  | mir-9a         | 0.43289  | mir-31a    | 0.91492  | mir-7      | 0.60850  | mir-263a   | 0.60851  | mir-34     | 0.43546  | mir-316      | 1.19749  | mir-312   | 0.58247  |
| chr3L | mir-33                     | 0.40440  | mir-33    | 0.60276  | mir-276a                  | 0.44185  | mir-277        | 0.32768  | mir-305    | 0.89363  | mir-125    | 0.96574  | mir-31a    | 0.59811  | mir-12     | 0.37588  | mir-311      | 0.97111  | mir-276a  | 0.56319  |
| chr2L | mir-9c                     | 0.39789  | mir-277   | 0.37739  | mir-306                   | 0.40712  | mir-9b         | 0.32531  | mir-996    | 0.82355  | mir-305    | 0.95444  | mir-33     | 0.49554  | mir-9c     | 0.32609  | mir-310      | 0.90984  | mir-276   | 0.52462  |
| chrX  | mir-980                    | 0.32192  | mir-308   | 0.37672  | mir-252                   | 0.31708  | mir-317        | 0.30320  | mir-317    | 0.70743  | mir-276b   | 0.78241  | mir-34     | 0.48268  | mir-79     | 0.29469  | mir-125      | 0.90306  | mir-7     | 0.48967  |
| chr3R | mir-1003                   | 0.31206  | mir-92a   | 0.33044  | mir-184                   | 0.30906  | mir-1          | 0.29669  | mir-279    | 0.65784  | mir-133    | 0.76965  | mir-958    | 0.37959  | mir-304    | 0.28288  | mir-278      | 0.65771  | mir-306   | 0.40612  |
| chr2R | mir-308                    | 0.31122  | mir-970   | 0.26494  | mir-277                   | 0.30792  | mir-279        | 0.29452  | mir-79     | 0.60700  | mir-987    | 0.74956  | mir-316    | 0.28530  | mir-958    | 0.28221  | mir-276a     | 0.60945  | let-7     | 0.35792  |
| chrX  | mir-970                    | 0.29324  | mir-2b    | 0.24593  | mir-278                   | 0.30410  | mir-306        | 0.22582  | mir-276b   | 0.57736  | mir-307    | 0.74442  | mir-9c     | 0.28334  | mir-278    | 0.27375  | mir-984      | 0.59671  | mir-31a   | 0.35390  |
| chr2R | mir-307                    | 0.19559  | mir-78    | 0.24571  | mir-9c                    | 0.28121  | mir-184        | 0.21418  | mir-999    | 0.56703  | mir-317    | 0.67901  | mir-133    | 0.26945  | mir-33     | 0.26490  | mir-975      | 0.57855  | mir-92a   | 0.31453  |
| chr2L | mir-965                    | 0.11731  | mir-981   | 0.21284  | mir-317                   | 0.27396  | mir-9c         | 0.18161  | mir-125    | 0.56561  | mir-929    | 0.62341  | mir-281-2  | 0.26235  | mir-281-2  | 0.23215  | mir-9c       | 0.55577  | mir-304   | 0.29846  |
| chr2L | mir-2b-1                   | 0.10451  | mir-283   | 0.20792  | mir-1                     | 0.25908  | mir-31a        | 0.15061  | mir-282    | 0.53936  | mir-79     | 0.62224  | mir-278    | 0.25546  | mir-125    | 0.23054  | mir-312      | 0.46197  | mir-984   | 0.28641  |
| chr2L | mir-275                    | 0.09674  | mir-1003  | 0.20166  | mir-988                   | 0.21291  | mir-252        | 0.12712  | mir-11     | 0.48946  | mir-279    | 0.60837  | mir-375    | 0.24167  | mir-316    | 0.22987  | mir-279      | 0.42130  | mir-313   | 0.25267  |
| chr2L | mir-2b-2                   | 0.09045  | mir-1000  | 0.19384  | mir-31a                   | 0.19879  | mir-965        | 0.11192  | mir-957    | 0.48513  | mir-957    | 0.57258  | mir-956    | 0.22336  | mir-9b     | 0.21578  | mir-375      | 0.40422  | mir-279   | 0.25106  |
| chrX  | mir-12                     | 0.08709  | mir-304   | 0.18803  | mir-2b-1                  | 0.17590  | mir-988        | 0.10640  | mir-13a    | 0.44209  | mir-999    | 0.49348  | mir-9b     | 0.21930  | mir-252    | 0.19055  | mir-92a      | 0.38606  | mir-317   | 0.21250  |
| chr2R | mir-7                      | 0.06967  | mir-275   | 0.18601  | mir-279                   | 0.12248  | mir-278        | 0.10383  | mir-307    | 0.44043  | mir-278    | 0.42620  | mir-252    | 0.20762  | mir-956    | 0.18693  | mir-31a      | 0.30744  | mir-281-1 | 0.20969  |
| chrX  | mir-13b-2                  | 0.06275  | mir-965   | 0.13593  | mir-1012                  | 0.08776  | mir-2b-1       | 0.09179  | mir-133    | 0.38123  | mir-13a    | 0.42396  | mir-274    | 0.18483  | mir-274    | 0.15821  | mir-252      | 0.26840  | mir-92b   | 0.20567  |
| chr3R | mir-999                    | 0.05184  | mir-92b   | 0.09994  | mir-986                   | 0.08051  | mir-10         | 0.07797  | mir-998    | 0.37453  | mir-932    | 0.40957  | mir-7      | 0.15484  | mir-7      | 0.12453  | mir-972      | 0.26054  | mir-2b-2  | 0.17916  |
| chr2R | mir-281-1                  | 0.03756  | mir-999   | 0.08362  | mir-10                    | 0.07593  | mir-1012       | 0.06830  | mir-10     | 0.29404  | mir-282    | 0.31584  | mir-980    | 0.15407  | mir-980    | 0.12185  | mir-306      | 0.25782  | mir-983   | 0.16590  |
| chr2L | mir-2a-1                   | 0.03631  | mir-990   | 0.06886  | mir-2b-2                  | 0.07211  | mir-7          | 0.05330  | mir-263b   | 0.28490  | mir-263b   | 0.28057  | mir-124    | 0.14728  | mir-929    | 0.10990  | mir-963      | 0.25105  | mir-998   | 0.16189  |
| chr3L | mir-190                    | 0.03589  | mir-980   | 0.06752  | mir-970                   | 0.06754  | mir-986        | 0.04461  | mir-263b   | 0.24761  | mir-998    | 0.26211  | mir-317    | 0.12192  | mir-375    | 0.10883  | mir-31b      | 0.23722  | mir-2a-2  | 0.13618  |
| chr3R | mir-1012                   | 0.03442  | mir-13b-2 | 0.06707  | mir-7                     | 0.06715  | let-7          | 0.04323  | mir-278    | 0.22301  | mir-9c     | 0.25580  | mir-31b    | 0.10638  | mir-999    | 0.13867  | mir-7        | 0.23997  | mir-316   | 0.13377  |
| chr2R | mir-1008                   | 0.01973  | mir-2a-1  | 0.05791  | mir-965                   | 0.04998  | mir-970        | 0.03908  | mir-9c     | 0.20614  | mir-10     | 0.22399  | mir-307    | 0.10612  | mir-275    | 0.10239  | mir-92b      | 0.20252  | mir-308   | 0.12975  |
| chr2L | mir-263a                   | 0.01385  | mir-7     | 0.05433  | mir-190                   | 0.04960  | mir-2b-2       | 0.03494  | mir-87     | 0.18478  | mir-193    | 0.20983  | mir-986    | 0.09671  | mir-308    | 0.09179  | bantam       | 0.18625  | mir-986   | 0.12091  |
| chr2L | mir-1006                   | 0.01217  | mir-1008  | 0.03913  | mir-2a-2                  | 0.04273  | mir-190        | 0.03316  | mir-995    | 0.17776  | mir-2a-2   | 0.20960  | mir-308    | 0.09589  | mir-317    | 0.07528  | mir-999      | 0.18246  | mir-125   | 0.10083  |
| chr3L | mir-9a                     | 0.01028  | mir-989   | 0.03532  | mir-1006                  | 0.02709  | mir-2a-2       | 0.03237  | mir-193    | 0.15593  | mir-87     | 0.19189  | mir-929    | 0.09311  | mir-87     | 0.07179  | mir-275      | 0.16402  | mir-307   | 0.09842  |
| chr2R | mir-283                    | 0.01007  | mir-2b-1  | 0.03085  | mir-13b-2                 | 0.02366  | mir-281-1      | 0.02329  | mir-33     | 0.14694  | mir-9b     | 0.17409  | mir-306    | 0.08833  | mir-986    | 0.06844  | mir-304      | 0.15074  | mir-311   | 0.09560  |
| chr2R | mir-278                    | 0.00986  | mir-252   | 0.03063  | mir-281-1                 | 0.02099  | mir-1006       | 0.02112  | mir-2a-2   | 0.14032  | mir-33     | 0.16610  | mir-999    | 0.07531  | mir-306    | 0.06696  | mir-184      | 0.14640  | mir-988   | 0.08596  |
| chr2R | mir-286                    | 0.00902  | mir-281-1 | 0.02951  | mir-281-2                 | 0.02022  | mir-281-2      | 0.01658  | mir-2b-1   | 0.13275  | mir-995    | 0.15358  | mir-993    | 0.07449  | mir-307    | 0.06468  | mir-979      | 0.13474  | mir-2b-1  | 0.07552  |
| chr2R | mir-281-2                  | 0.00714  | mir-276b  | 0.02795  | mir-1003                  | 0.01297  | mir-13b-2      | 0.01382  | mir-9b     | 0.12274  | mir-316    | 0.15119  | mir-       |          |            |          |              |          |           |          |

|          |             |         |             |         |             |         |             |         |             |         |            |         |             |         |             |         |             |         |             |         |
|----------|-------------|---------|-------------|---------|-------------|---------|-------------|---------|-------------|---------|------------|---------|-------------|---------|-------------|---------|-------------|---------|-------------|---------|
| chr2R    | mir-989     | 0.00063 | mir-284     | 0.00112 | mir-100     | 0.00038 | mir-314     | 0.00059 | mir-1003    | 0.00843 | mir-375    | 0.00850 | mir-974     | 0.01214 | mir-1008    | 0.00483 | mir-2b-2    | 0.01084 | mir-964     | 0.00201 |
| chr2R    | mir-313     | 0.00042 | mir-1013    | 0.00089 | mir-1010    | 0.00038 | mir-980     | 0.00059 | mir-1005    | 0.00796 | mir-1013   | 0.00612 | mir-1012    | 0.01106 | mir-1ab-4   | 0.00470 | mir-133     | 0.01030 | mir-1006    | 0.00161 |
| chr2R    | mir-992     | 0.00042 | mir-1016    | 0.00089 | mir-219     | 0.00038 | mir-981     | 0.00059 | mir-1013    | 0.00709 | mir-1007   | 0.00584 | mir-985     | 0.01101 | mir-1003    | 0.00456 | mir-137     | 0.01030 | mir-5       | 0.00161 |
| chr3R    | mir-10      | 0.00021 | mir-310     | 0.00089 | mir-276b    | 0.00038 | mir-1009    | 0.00039 | mir-954     | 0.00465 | mir-954    | 0.00579 | mir-997     | 0.00947 | mir-960     | 0.00456 | mir-971     | 0.00895 | mir-959     | 0.00161 |
| chr3R    | mir-1000    | 0.00021 | mir-978     | 0.00089 | mir-3       | 0.00038 | mir-932     | 0.00039 | mir-375     | 0.00449 | mir-1008   | 0.00486 | mir-961     | 0.00911 | mir-1001    | 0.00389 | mir-308     | 0.00813 | mir-991     | 0.00161 |
| chr2L    | mir-1005    | 0.00021 | mir-992     | 0.00089 | mir-307     | 0.00038 | mir-960     | 0.00039 | mir-92b     | 0.00426 | mir-960    | 0.00481 | mir-190     | 0.00833 | mir-1ab-4as | 0.00376 | mir-13a     | 0.00786 | mir-3       | 0.00121 |
| chr3R    | mir-1010    | 0.00021 | mir-125     | 0.00067 | mir-309     | 0.00038 | mir-969     | 0.00039 | mir-955     | 0.00426 | mir-13b-2  | 0.00472 | mir-1ab-4as | 0.00741 | mir-955     | 0.00349 | mir-314     | 0.00786 | mir-932     | 0.00080 |
| chr2R    | mir-1013    | 0.00021 | mir-133     | 0.00067 | mir-310     | 0.00038 | mir-993     | 0.00039 | mir-971     | 0.00315 | mir-1009   | 0.00397 | mir-303     | 0.00730 | mir-1013    | 0.00322 | mir-281-2   | 0.00569 | mir-983-1   | 0.00080 |
| chrX     | mir-210     | 0.00021 | mir-2282    | 0.00067 | mir-4       | 0.00038 | mir-994     | 0.00039 | mir-1016    | 0.00276 | mir-955    | 0.00392 | mir-1003    | 0.00638 | mir-2a-1    | 0.00295 | mir-318     | 0.00542 | mir-1008    | 0.00040 |
| chr3L    | mir-2282    | 0.00021 | mir-263a    | 0.00067 | mir-954     | 0.00038 | mir-1004    | 0.00020 | mir-2a-1    | 0.00268 | mir-1016   | 0.00355 | mir-1005    | 0.00628 | mir-219     | 0.00282 | mir-2c      | 0.00515 | mir-1013    | 0.00040 |
| chr3L    | mir-263b    | 0.00021 | mir-305-as  | 0.00067 | mir-962     | 0.00038 | mir-137     | 0.00020 | mir-1009    | 0.00236 | mir-314    | 0.00336 | mir-991     | 0.00617 | mir-1007    | 0.00255 | mir-994     | 0.00515 | mir-124     | 0.00040 |
| chr3L    | mir-274     | 0.00021 | mir-309     | 0.00067 | mir-966     | 0.00038 | mir-2279-as | 0.00020 | mir-960     | 0.00236 | mir-971    | 0.00327 | mir-982     | 0.00607 | mir-981     | 0.00255 | mir-284     | 0.00434 | mir-133     | 0.00040 |
| chr2R    | mir-307-as  | 0.00021 | mir-31b     | 0.00067 | let-7-as    | 0.00000 | mir-275-as  | 0.00020 | mir-962     | 0.00221 | mir-92b    | 0.00318 | mir-1001    | 0.00545 | mir-1015    | 0.00201 | mir-981     | 0.00434 | mir-193     | 0.00040 |
| chr2L    | mir-375     | 0.00021 | mir-6       | 0.00067 | mir-1-as    | 0.00000 | mir-284     | 0.00020 | mir-13b-2   | 0.00213 | mir-2a-1   | 0.00299 | mir-1008    | 0.00545 | mir-1004    | 0.00174 | mir-1ab-4as | 0.00434 | mir-2c      | 0.00040 |
| chr3R    | mir-929     | 0.00021 | mir-975     | 0.00067 | mir-1001    | 0.00000 | mir-3       | 0.00020 | mir-314     | 0.00142 | mir-962    | 0.00257 | mir-312     | 0.00489 | mir-311     | 0.00174 | mir-1006    | 0.00407 | mir-305-as  | 0.00040 |
| chr3L    | mir-958     | 0.00021 | mir-987     | 0.00067 | mir-1002    | 0.00000 | mir-318     | 0.00020 | mir-13b-1   | 0.00110 | mir-31b    | 0.00206 | mir-1ab-4   | 0.00484 | mir-954     | 0.00148 | mir-190     | 0.00352 | mir-955     | 0.00040 |
| chrX     | mir-977     | 0.00021 | mir-137     | 0.00045 | mir-1004    | 0.00000 | mir-954     | 0.00020 | mir-305-as  | 0.00095 | mir-964    | 0.00192 | mir-13b-2   | 0.00473 | mir-2c      | 0.00134 | mir-263b    | 0.00352 | mir-963     | 0.00040 |
| chrX     | mir-978     | 0.00021 | mir-263b    | 0.00045 | mir-1004-as | 0.00000 | mir-956     | 0.00020 | mir-984     | 0.00079 | mir-958    | 0.00135 | mir-219     | 0.00432 | mir-964     | 0.00134 | mir-2a-1    | 0.00352 | mir-985     | 0.00040 |
| chrX     | mir-981     | 0.00021 | mir-311     | 0.00045 | mir-1007    | 0.00000 | mir-958     | 0.00020 | mir-983     | 0.00071 | mir-13b-1  | 0.00103 | mir-285     | 0.00391 | mir-310     | 0.00121 | mir-315     | 0.00325 | mir-1ab-4   | 0.00040 |
| chr2L    | let-7-as    | 0.00000 | mir-313     | 0.00045 | mir-1011    | 0.00000 | mir-967     | 0.00020 | mir-1011    | 0.00063 | mir-5      | 0.00103 | mir-973     | 0.00391 | mir-927     | 0.00121 | mir-87      | 0.00325 | let-7-as    | 0.00000 |
| chr2L    | mir-1-as    | 0.00000 | mir-314     | 0.00045 | mir-1014    | 0.00000 | mir-971     | 0.00020 | mir-312     | 0.00063 | mir-956    | 0.00093 | mir-311     | 0.00350 | mir-1016    | 0.00107 | mir-1008    | 0.00298 | mir-1-as    | 0.00000 |
| chr2L    | mir-100     | 0.00000 | mir-100     | 0.00045 | mir-1015    | 0.00000 | let-7-as    | 0.00000 | mir-966     | 0.00063 | mir-961    | 0.00093 | mir-1015    | 0.00319 | mir-313     | 0.00107 | mir-210     | 0.00271 | mir-1000    | 0.00000 |
| chr3R    | mir-1001    | 0.00000 | mir-87      | 0.00045 | mir-1017    | 0.00000 | mir-1-as    | 0.00000 | mir-2279    | 0.00055 | mir-963    | 0.00093 | mir-972     | 0.00314 | mir-315     | 0.00094 | mir-958     | 0.00244 | mir-1001    | 0.00000 |
| chr2L    | mir-1002    | 0.00000 | mir-929     | 0.00045 | mir-137     | 0.00000 | mir-1001    | 0.00000 | mir-31b     | 0.00055 | mir-1011   | 0.00089 | mir-313     | 0.00304 | mir-983     | 0.00094 | mir-965     | 0.00244 | mir-1002    | 0.00000 |
| chr2L    | mir-1004    | 0.00000 | mir-974     | 0.00045 | mir-193     | 0.00000 | mir-1002    | 0.00000 | mir-5       | 0.00055 | mir-959    | 0.00084 | mir-955     | 0.00304 | mir-984     | 0.00094 | mir-3       | 0.00217 | mir-1004    | 0.00000 |
| chr2L    | mir-1004-as | 0.00000 | mir-210     | 0.00022 | mir-2279-as | 0.00000 | mir-1004-as | 0.00000 | mir-959     | 0.00055 | mir-2279   | 0.00075 | mir-981     | 0.00288 | mir-1017    | 0.00081 | mir-193     | 0.00190 | mir-1004-as | 0.00000 |
| chr3R    | mir-1011    | 0.00000 | mir-2279-as | 0.00022 | mir-2280    | 0.00000 | mir-1010    | 0.00000 | mir-964     | 0.00055 | mir-983    | 0.00075 | mir-310     | 0.00283 | mir-963     | 0.00081 | mir-955     | 0.00190 | mir-1011    | 0.00000 |
| chr3R    | mir-1014    | 0.00000 | mir-927     | 0.00022 | mir-2281    | 0.00000 | mir-1011    | 0.00000 | mir-961     | 0.00039 | mir-286    | 0.00070 | mir-1013    | 0.00267 | mir-966     | 0.00081 | mir-1ab-4   | 0.00190 | mir-1014    | 0.00000 |
| chr3R    | mir-1015    | 0.00000 | mir-956     | 0.00022 | mir-2282    | 0.00000 | mir-1014    | 0.00000 | mir-963     | 0.00039 | mir-966    | 0.00056 | mir-954     | 0.00257 | mir-969     | 0.00081 | mir-1007    | 0.00163 | mir-1015    | 0.00000 |
| chr3R    | mir-1017    | 0.00000 | mir-960     | 0.00022 | mir-2283    | 0.00000 | mir-1015    | 0.00000 | mir-974     | 0.00039 | mir-984    | 0.00051 | mir-1007    | 0.00242 | mir-961     | 0.00067 | mir-1016    | 0.00163 | mir-1016    | 0.00000 |
| chr2R    | mir-137     | 0.00000 | mir-963     | 0.00022 | mir-275-as  | 0.00000 | mir-1017    | 0.00000 | mir-286     | 0.00032 | mir-312    | 0.00042 | mir-992     | 0.00231 | mir-285     | 0.00054 | mir-956     | 0.00163 | mir-1017    | 0.00000 |
| chr3R    | mir-13b-1   | 0.00000 | mir-976     | 0.00022 | mir-287     | 0.00000 | mir-219     | 0.00000 | mir-313     | 0.00032 | mir-305-as | 0.00037 | mir-1004    | 0.00226 | mir-5       | 0.00054 | mir-989     | 0.00163 | mir-137     | 0.00000 |
| chr3L    | mir-219     | 0.00000 | mir-993     | 0.00022 | mir-289     | 0.00000 | mir-2280    | 0.00000 | mir-956     | 0.00032 | mir-318    | 0.00028 | mir-989     | 0.00226 | mir-1009    | 0.00040 | mir-1009    | 0.00136 | mir-13b-1   | 0.00000 |
| chr2Rhet | mir-2279-as | 0.00000 | mir-1ab-4   | 0.00022 | mir-303     | 0.00000 | mir-2281    | 0.00000 | mir-967     | 0.00032 | mir-989    | 0.00028 | mir-92b     | 0.00216 | mir-2279    | 0.00040 | mir-929     | 0.00108 | mir-210     | 0.00000 |
| chr2L    | mir-2280    | 0.00000 | let-7-as    | 0.00000 | mir-311     | 0.00000 | mir-2282    | 0.00000 | mir-2283    | 0.00024 | mir-3      | 0.00023 | mir-927     | 0.00211 | mir-959     | 0.00040 | mir-1005    | 0.00081 | mir-219     | 0.00000 |
| chr2L    | mir-2281    | 0.00000 | mir-31-as   | 0.00000 | mir-312     | 0.00000 | mir-2283    | 0.00000 | mir-3       | 0.00024 | mir-4      | 0.00023 | mir-1009    | 0.00195 | mir-982     | 0.00040 | mir-1011    | 0.00081 | mir-2279    | 0.00000 |
| chr3R    | mir-2283    | 0.00000 | mir-100     | 0.00000 | mir-313     | 0.00000 | mir-287     | 0.00000 | mir-4       | 0.00024 | mir-313    | 0.00019 | mir-975     | 0.00170 | mir-976     | 0.00027 | mir-2279    | 0.00081 | mir-2279-as | 0.00000 |
| chr2L    | mir-275-as  | 0.00000 | mir-1001    | 0.00000 | mir-315     | 0.00000 | mir-289     | 0.00000 | mir-958     | 0.00024 | mir-977    | 0.00019 | mir-2c      | 0.00139 | mir-985     | 0.00027 | mir-276b    | 0.00081 | mir-2280    | 0.00000 |
| chr2L    | mir-284     | 0.00000 | mir-1002    | 0.00000 | mir-318     | 0.00000 | mir-2c      | 0.00000 | mir-977     | 0.00024 | mir-2283   | 0.00014 | mir-969     | 0.00139 | mir-990     | 0.00027 | mir-987     | 0.00081 | mir-2281    | 0.00000 |
| chr3L    | mir-285     | 0.00000 | mir-1004    | 0.00000 | mir-31b     | 0.00000 | mir-303     | 0.00000 | mir-310     | 0.00016 | mir-303    | 0.00014 | mir-1017    | 0.00129 | mir-991     | 0.00027 | mir-1001    | 0.00054 | mir-2282    | 0.00000 |
| chr3L    | mir-287     | 0.00000 | mir-1004-as | 0.00000 | mir-6       | 0.00000 | mir-307     | 0.00000 | mir-968     | 0.00016 | mir-307-as | 0.00014 | mir-315     | 0.00123 | mir-13b-1   | 0.00013 | mir-1015    | 0.00054 | mir-2283    | 0.00000 |
| chr3L    | mir-289     | 0.00000 | mir-1005    | 0.00000 | mir-927     | 0.00000 | mir-309     | 0.00000 | mir-978     | 0.00016 | mir-968    | 0.00014 | mir-2a-1    | 0.00108 | mir-193     | 0.00013 | mir-2b-1    | 0.00054 | mir-263b    | 0.00000 |
| chr2L    | mir-305-as  | 0.00000 | mir-1011    | 0.00000 | mir-955     | 0.00000 | mir-310     | 0.00000 | mir-994     | 0.00016 | mir-978    | 0.00014 | mir-979     | 0.00108 | mir-2281    | 0.00013 | mir-1000    | 0.00027 | mir-275-as  | 0.00000 |
| chr3L    | mir-314     | 0.00000 | mir-1014    | 0.00000 | mir-956     | 0.00000 | mir-311     | 0.00000 | mir-1ab-4   | 0.00016 | mir-982    | 0.00014 | mir-1016    | 0.00093 | mir-286     | 0.00013 | mir-1017    | 0.00027 | mir-276b    | 0.00000 |
| chr3L    | mir-315     | 0.00000 | mir-1015    | 0.00000 | mir-958     | 0.00000 | mir-312     | 0.00000 | mir-1004-as | 0.00008 | mir-994    | 0.00014 | mir-5       | 0.00072 | mir-287     | 0.00013 | mir-13b-2   | 0.00027 | mir-285     | 0.00000 |
| chr3L    | mir-316     | 0.00000 | mir-1017    | 0.00000 | mir-959     | 0.00000 | mir-313     | 0.00000 | mir-275-as  | 0.00008 | mir-310    | 0.00009 | mir-193     | 0.00062 | mir-289     | 0.00013 | mir-219     | 0.00027 | mir-286     | 0.00000 |
| chr2L    | mir-87      | 0.00000 | mir-13b-1   | 0.00000 | mir-960     | 0.00000 | mir-315     | 0.00000 | mir-303     | 0.00008 | mir-311    | 0.00009 | mir-2279    | 0.00062 | mir-3       | 0.00013 | mir-2283    | 0.00027 | mir-287     | 0.00000 |
| chrX     | mir-927     | 0.00000 | mir-219     | 0.00000 | mir-961     | 0.00000 | mir-31b     | 0.00000 | mir-311     | 0.00008 | mir-967    | 0.00009 | mir-990     | 0.00041 | mir-303     | 0.00013 | mir-983-1   | 0.00027 | mir-289     | 0.00000 |
| chr3L    | mir-955     | 0.00000 | mir-2280    | 0.00000 | mir-963     | 0.00000 | mir-6       | 0.00000 | mir-318     | 0.00008 | mir-974    | 0.00009 | mir-307-as  | 0.00031 | mir-305-as  | 0.00013 | mir-993     | 0.00027 | mir-307-as  | 0.00000 |
| chr3L    | mir-956     | 0.00000 | mir-2281    | 0.00000 | mir-964     | 0.00000 | mir-927     | 0.00000 | mir-982     | 0.00008 | mir-976    | 0.00009 | mir-286     | 0.00026 | mir-307-as  | 0.00013 | let-7-as    | 0.00000 | mir-309     | 0.00000 |
| chr3L    | mir-957     | 0.00000 | mir-2283    | 0.00000 | mir-967     | 0.00000 | mir-955     | 0.00000 | mir-985     | 0.00008 | mir-1ab-4  | 0.00009 | mir-966     | 0.00026 | mir-973     | 0.00013 | mir-1-as    | 0.00000 | mir-315     | 0.00000 |
| chr2L    | mir-959     | 0.00000 | mir-274     | 0.00000 | mir-968     | 0.00000 | mir-959     | 0.00000 | mir-989     | 0.00008 | mir-1015   | 0.00005 | mir-13b-1   | 0.00021 | mir-974     | 0.00013 | mir-1002    | 0.00000 | mir-375     | 0.00000 |
| chr2L    | mir-960     | 0.00000 | mir-275-as  | 0.00000 | mir-969     | 0       |             |         |             |         |            |         |             |         |             |         |             |         |             |         |
