# Supplementary material
Source: PubMed Central journal article supplement (PMC4196619)
Supplement: supp_114.169268_FigureS2.pdf [file supp_114.169268_FigureS2.pdf]

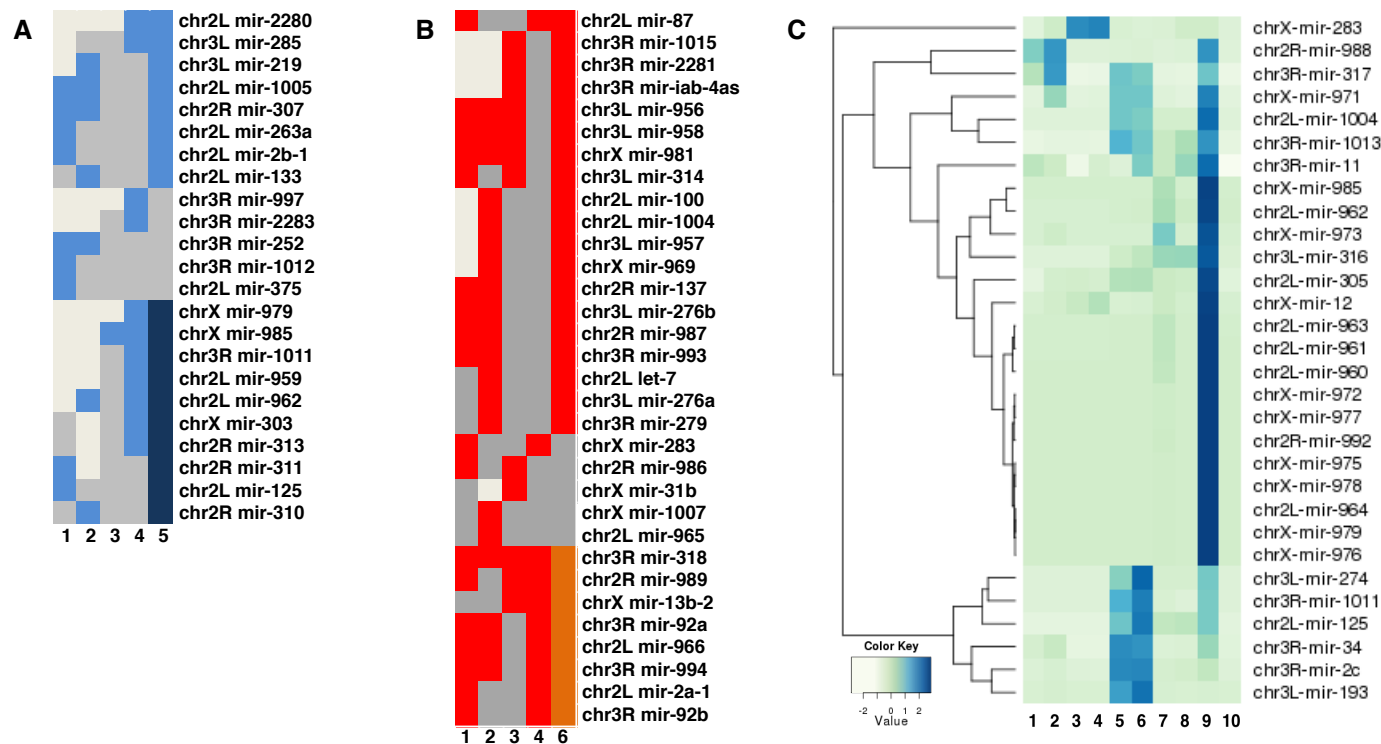

**Figure S2: Male-enriched, female-enriched and X-linked testis-enriched miRNAs.** (A) 23 miRNAs enriched in male somatic tissues in pairwise comparisons of S2 vs. Kc cells (1), male vs. female salivary glands (2), heads (3), and decapitated body (4). Colors indicate male-enriched miRNAs (light blue), miRNAs present at similar levels in both sexes (grey), poorly expressed miRNAs (white) and whether these miRNAs are more abundant in the male body (light blue) or testis (dark blue) in (5). (B) 32 female-enriched miRNAs in somatic tissues. Colors indicate female-enriched miRNAs (red), miRNAs present at similar levels in both sexes (grey), poorly expressed miRNAs (white) in somatic tissues [tissues (1) to (4)] as in (A), and whether these miRNAs are more abundant in the female body (red) or ovary (orange) in (6). (C) Relative abundance across all sexed tissues of the 30 miRNAs enriched exclusively in testis compared to the male body and not enriched in ovaries in females. 11 of the 30 testis-enriched miRNAs reside on the X chromosome. These miRNAs are highly and almost exclusively expressed in testis. S2 cells (1), Kc cells (2), male (3) and female (4) salivary glands, heads [male (5), female (6)], body [male (7), female (8)], testis (9), ovary (10).
