# Supplementary material
Source: PubMed Central journal article supplement (PMC4196619)
Supplement: supp_114.169268_TableS1.pdf [file supp_114.169268_TableS1.pdf]

**TABLE S1: PCR primers used in this study****2S rRNA depletion:**

5'-AGTCTTACAACCCTCAACCATATGTAGTCCAAGCAGCACT-3'

**qPCR (miScript assay):**

|                  |                                     |                    |
|------------------|-------------------------------------|--------------------|
| bantam-fwd       | 5'-GAGATCATTGAAAGCTGATT-3'          |                    |
| miR-12-fwd       | 5'-GAGTATTACATCAGGTAAGTGGT-3'       |                    |
| mir-13b-1-2-fwd  | 5'-TATCACAGCCATTTTGACGAGT-3'        |                    |
| mir-13a-fwd      | 5'-TATCACAGCCATTTTGATGAGT-3'        |                    |
| mir-283-fwd      | 5'-TAAATATCAGCTGGTAATTCT-3'         |                    |
| mir-304-fwd      | 5'-AATCTCAATTTGTAAATGTGAG-3'        |                    |
| mir-210-fwd      | 5'-TTGTGCGTGTGACAGCGGCTA-3'         |                    |
| mir-iab-4-5p-fwd | 5'-ACGTATACTGAATGTATCCTGA-3'        |                    |
| mir-iab-4-3p-fwd | 5'-GTATACCTTCAGTATACGTAAC-3'        |                    |
| mir-318-fwd      | 5'-TCACTGGGCTTTGTTTATCTCA-3'        |                    |
| mir-985-fwd      | 5'-CAAATGTTCCAATGGTTCGGGCA-3'       |                    |
| mir-979-fwd      | 5'-TTCTTCCCGAACTCAGGCTAA-3'         |                    |
| mir-981-fwd      | 5'-TTCGTTGTGACGAAACCTGCA-3'         |                    |
| mir-977-fwd      | 5'-TGAGATATTCACGTTGTCTAA-3'         |                    |
| mir-285-fwd      | 5'-TAGCACCATTGAAATCAGTGC-3'         |                    |
| mir-969-fwd      | 5'-GAGTTCCACTAAGCAAGTTTT-3'         |                    |
| mir-972-fwd      | 5'-TGTACAATACGAATATTTAGGC-3'        |                    |
| mir-978-fwd      | 5'-TGTCCAGTGCCGTAATTGCAG-3'         |                    |
| mir-314-fwd      | 5'-TATTCGAGCCAATAAGTTCGG-3'         |                    |
| mir-100-fwd      | 5'-AACCCGTAAATCCGAACTTGTG-3'        |                    |
| mir-137-Fwd      | 5'-TATTGCTTGAGAATACACGTAG-3'        |                    |
| mir-989-fwd      | 5'-ATGTGATGTGACGTAGTGGAAAC-3'       |                    |
| mir-1013-fwd     | 5'-AATAAAAGTATGCCGAACTCG-3'         |                    |
| mir-Spike-fwd    | 5'-CTCAGGATGGCGGAGCGGTGT-3'         | external reference |
| U6snRNA-fwd      | 5'-ATTGGAACGATACAGAGAAGATTAG-3'     | reference          |
| Dspt-4-fwd       | 5'-TTGACGCGATACCCAAGGAT-3'          | reference          |
| Dspt4-rev        | 5'-CTAGTGTGATCATAGACATTGTCCTTGTT-3' |                    |

**qPCR on sex-specific transcripts:**

|           |                              |                                           |
|-----------|------------------------------|-------------------------------------------|
| RpL32-fwd | 5'-AAGATGACCATCCGCCAGC-3'    | endogenous control                        |
| RpL32-rev | 5'-GTCGATACCCTTGGGCTTGC-3'   |                                           |
| Esg-fwd   | 5'-CGCCCATGAGATCTGAAATC-3'   |                                           |
| Esg rev   | 5'-GGTCTTGTACAATCCTTGC-3'    | ( <a href="#">Chau et al. 2009</a> )      |
| DsxM fwd  | 5'-TCCTTGGGAGCTGATGCCAC-3'   |                                           |
| DsxM rev  | 5'-GGCTACAGTGCGATTTATT-3'    |                                           |
| Yp1-fwd   | 5'-TGAGCGTCTGGAGAACATGAA-3'  |                                           |
| Yp1-rev   | 5'-GCGACAGGTGGTAGACTTGCT-3'  |                                           |
| tra1-fwd  | 5'-GGAACCCAGCATCGAGATTC-3'   |                                           |
| tra1-rev  | 5'-ATCGCCCATGGTATTCTCTTTC-3' |                                           |
| Sxl-fwd   | 5'-ACAACGACAGCAGCAGGCCA-3'   |                                           |
| Sxl-rev   | 5'-TTGTAACCACGACGCGACGAT-3'  | ( <a href="#">Hashiyama et al. 2011</a> ) |
