# Supplementary material
Source: PubMed Central journal article supplement (PMC4196619)
Supplement: supp_114.169268_TableS2.pdf [file supp_114.169268_TableS2.pdf]

**TABLE S2: Late embryo-derived Lymphoid S2 (male) and Kc (female) cells biased miRNAs**

**S2 biased**

| chrom | miRNA        | S2 reads | Kc reads | M/M+F   | F/M+F   | Sum reads    | % miRNA |
|-------|--------------|----------|----------|---------|---------|--------------|---------|
| chr3R | dme-mir-252  | 13294    | 205      | 0.98479 | 0.01521 | <b>13499</b> | 1.1771  |
| chr2R | dme-mir-307  | 932      | 33       | 0.96584 | 0.03416 | <b>965</b>   | 0.0841  |
| chr2L | dme-mir-263a | 66       | 4        | 0.93623 | 0.06377 | <b>70</b>    | 0.0061  |
| chrX  | dme-mir-980  | 1534     | 453      | 0.77219 | 0.22781 | <b>1987</b>  | 0.1732  |
| chr3L | dme-mir-282  | 13543    | 4622     | 0.74557 | 0.25443 | <b>18165</b> | 1.5839  |
| chr2R | dme-mir-311  | 8        | 3        | 0.72746 | 0.27254 | <b>11</b>    | 0.001   |
| chr3R | dme-mir-1012 | 164      | 63       | 0.72266 | 0.27734 | <b>227</b>   | 0.0198  |
| chr2L | dme-mir-2b-1 | 498      | 207      | 0.70658 | 0.29342 | <b>705</b>   | 0.0615  |
| chr2L | dme-mir-125  | 10       | 4        | 0.68986 | 0.31014 | <b>14</b>    | 0.0013  |
| chr2R | dme-mir-286  | 43       | 21       | 0.67209 | 0.32791 | <b>64</b>    | 0.0056  |

**Kc biased**

| chrom | miRNA        | S2   | Kc reads | M/M+F   | F/M+F   | Sum reads    | % miRNA |
|-------|--------------|------|----------|---------|---------|--------------|---------|
| chrX  | dme-mir-971  | 0    | 52       | 0       | 1       | <b>52</b>    | 0.0046  |
| chrX  | dme-mir-973  | 0    | 12       | 0       | 1       | <b>12</b>    | 0.001   |
| chrX  | dme-mir-982  | 0    | 16       | 0       | 1       | <b>16</b>    | 0.0014  |
| chrX  | dme-mir-981  | 1    | 1427     | 0.00070 | 0.99930 | <b>1428</b>  | 0.1245  |
| chr3R | dme-mir-1000 | 1    | 1299     | 0.00077 | 0.99923 | <b>1300</b>  | 0.1134  |
| chr3R | dme-mir-92a  | 13   | 2215     | 0.00584 | 0.99416 | <b>2228</b>  | 0.1943  |
| chr3R | dme-mir-1010 | 1    | 106      | 0.00931 | 0.99069 | <b>107</b>   | 0.0094  |
| chr2R | dme-mir-989  | 3    | 237      | 0.01251 | 0.98749 | <b>240</b>   | 0.0209  |
| chrX  | dme-mir-977  | 1    | 66       | 0.01494 | 0.98506 | <b>67</b>    | 0.0058  |
| chr3L | dme-mir-276b | 5    | 187      | 0.02600 | 0.97400 | <b>192</b>   | 0.0168  |
| chrX  | dme-mir-304  | 34   | 1260     | 0.02627 | 0.97373 | <b>1294</b>  | 0.1129  |
| chr2L | dme-mir-932  | 5    | 177      | 0.02750 | 0.97250 | <b>182</b>   | 0.0159  |
| chr2R | dme-mir-278  | 47   | 1647     | 0.02775 | 0.97225 | <b>1694</b>  | 0.1477  |
| chr3R | dme-mir-92b  | 20   | 670      | 0.02899 | 0.97101 | <b>690</b>   | 0.0602  |
| chr3L | dme-mir-193  | 3    | 96       | 0.03033 | 0.96967 | <b>99</b>    | 0.0086  |
| chrX  | dme-mir-283  | 48   | 1394     | 0.03330 | 0.96670 | <b>1442</b>  | 0.1257  |
| chr3L | dme-mir-958  | 1    | 28       | 0.03393 | 0.96607 | <b>29</b>    | 0.0026  |
| chr3R | dme-mir-10   | 1    | 27       | 0.03575 | 0.96425 | <b>28</b>    | 0.0024  |
| chrX  | dme-mir-12   | 415  | 10569    | 0.03778 | 0.96222 | <b>10984</b> | 0.9578  |
| chr2R | dme-mir-986  | 3    | 43       | 0.06457 | 0.93543 | <b>46</b>    | 0.0041  |
| chr2L | dme-mir-124  | 8    | 94       | 0.07812 | 0.92188 | <b>102</b>   | 0.0089  |
| chr4  | dme-mir-954  | 11   | 91       | 0.10741 | 0.89259 | <b>102</b>   | 0.0089  |
| chr3R | dme-mir-994  | 5    | 40       | 0.10998 | 0.89002 | <b>45</b>    | 0.004   |
| chr2R | dme-mir-8    | 4003 | 27812    | 0.12582 | 0.87418 | <b>31815</b> | 2.7742  |
| chr3R | dme-mir-318  | 13   | 90       | 0.12632 | 0.87368 | <b>103</b>   | 0.009   |
| chr2L | dme-mir-9b   | 2463 | 11885    | 0.17166 | 0.82834 | <b>14348</b> | 1.2511  |
| chr2L | dme-mir-2a-2 | 2015 | 9699     | 0.17202 | 0.82798 | <b>11714</b> | 1.0214  |
| chrX  | dme-mir-984  | 25   | 102      | 0.19700 | 0.80300 | <b>127</b>   | 0.0111  |
| chr2L | dme-mir-966  | 15   | 58       | 0.20424 | 0.79576 | <b>73</b>    | 0.0064  |
| chr2L | dme-mir-2b-2 | 431  | 1648     | 0.20727 | 0.79273 | <b>2079</b>  | 0.1813  |
| chr2L | dme-mir-2a   | 7839 | 29779    | 0.20838 | 0.79162 | <b>37618</b> | 3.2803  |
| chr2R | dme-mir-31a  | 5    | 18       | 0.21756 | 0.78244 | <b>23</b>    | 0.002   |

|       |              |       |        |         |         |               |         |
|-------|--------------|-------|--------|---------|---------|---------------|---------|
| chr2L | dme-mir-1    | 23    | 82     | 0.21817 | 0.78183 | <b>105</b>    | 0.0092  |
| chr3R | dme-mir-13a  | 25    | 85     | 0.22641 | 0.77359 | <b>110</b>    | 0.0096  |
| chr3L | dme-mir-276  | 4524  | 15417  | 0.22687 | 0.77313 | <b>19941</b>  | 1.7389  |
| chr2L | dme-mir-305  | 3321  | 10310  | 0.24364 | 0.75636 | <b>13631</b>  | 1.1886  |
| chr2R | dme-mir-312  | 3     | 9      | 0.25018 | 0.74982 | <b>12</b>     | 0.001   |
| chr2L | dme-mir-9c   | 1896  | 5648   | 0.25132 | 0.74868 | <b>7544</b>   | 0.6578  |
| chr2R | dme-mir-1008 | 94    | 262    | 0.26386 | 0.73614 | <b>356</b>    | 0.0311  |
| chr2L | dme-mir-275  | 461   | 1247   | 0.26994 | 0.73006 | <b>1708</b>   | 0.1489  |
| chr3L | dme-mir-190  | 171   | 462    | 0.27033 | 0.72967 | <b>633</b>    | 0.0552  |
| chr2L | dme-mir-79   | 2043  | 5420   | 0.27374 | 0.72626 | <b>7463</b>   | 0.6508  |
| chr3L | dme-mir-9a   | 49    | 124    | 0.28262 | 0.71738 | <b>173</b>    | 0.0151  |
| chr2L | dme-mir-1006 | 58    | 145    | 0.28521 | 0.71479 | <b>203</b>    | 0.0177  |
| chr2L | dme-mir-306  | 2500  | 6128   | 0.28977 | 0.71023 | <b>8628</b>   | 0.7523  |
| chr3R | dme-mir-317  | 9157  | 21083  | 0.30281 | 0.69719 | <b>30240</b>  | 2.6369  |
| chr3R | dme-mir-999  | 247   | 560    | 0.30590 | 0.69410 | <b>807</b>    | 0.0704  |
| chr2R | dme-mir-1009 | 4     | 9      | 0.30790 | 0.69210 | <b>13</b>     | 0.0011  |
| chrX  | dme-mir-983  | 6     | 13     | 0.30790 | 0.69210 | <b>19</b>     | 0.0017  |
| chr2L | dme-mir-2a-1 | 173   | 388    | 0.30831 | 0.69169 | <b>561</b>    | 0.0489  |
| chr3R | dme-mir-2c   | 9     | 19     | 0.31600 | 0.68400 | <b>28</b>     | 0.0025  |
| chr3L | dme-mir-33   | 1927  | 4040   | 0.32294 | 0.67706 | <b>5967</b>   | 0.5203  |
| chr2L | dme-mir-2b   | 9981  | 20837  | 0.32387 | 0.67613 | <b>30818</b>  | 2.6874  |
| chr2R | dme-mir-184  | 54062 | 109778 | 0.32997 | 0.67003 | <b>163840</b> | 14.2868 |

At least 10 normalized reads in the summed normalized reads were required. S2: Male (M); Kc: Female (F).

A ratio  $(F/M+F) \geq 0.66$  is female biased. A ratio  $(M/M+F) \geq 0.66$  is male biased.
