# Supplementary material
Source: PubMed Central journal article supplement (PMC4196619)
Supplement: supp_114.169268_TableS3.pdf [file supp_114.169268_TableS3.pdf]

**TABLE S3: Male and female biased miRNAs in L3 larval salivary glands**

**Male biased**

| chrom | miRNA        | Male S. Gland<br>reads | Female S. Gland<br>reads | M/M+F   | F/M+F   | Sum Reads    | % miRNA |
|-------|--------------|------------------------|--------------------------|---------|---------|--------------|---------|
| chr2L | dme-mir-275  | 21773                  | 2588                     | 0.89376 | 0.10624 | <b>24361</b> | 2.63097 |
| chr2R | dme-mir-1009 | 8                      | 2                        | 0.80000 | 0.20000 | <b>10</b>    | 0.00108 |
| chr2R | dme-mir-278  | 1275                   | 526                      | 0.70797 | 0.29203 | <b>1801</b>  | 0.19453 |
| chr2L | dme-mir-133  | 10                     | 4                        | 0.70588 | 0.29412 | <b>14</b>    | 0.00147 |
| chr2L | dme-mir-1005 | 26                     | 11                       | 0.69945 | 0.30055 | <b>37</b>    | 0.00395 |
| chr3R | dme-mir-252  | 1330                   | 644                      | 0.67369 | 0.32631 | <b>1974</b>  | 0.21315 |

**Female biased**

| chrom | miRNA          | Male S. Gland<br>reads | Female S. Gland<br>reads | M/M+F   | F/M+F   | Sum Reads    | % miRNA |
|-------|----------------|------------------------|--------------------------|---------|---------|--------------|---------|
| chr2L | dme-mir-100    | 2                      | 10                       | 0.13793 | 0.86207 | <b>12</b>    | 0.00125 |
| chr3L | dme-mir-282    | 6635                   | 31936                    | 0.17202 | 0.82798 | <b>38571</b> | 4.1657  |
| chr2L | dme-let-7      | 48                     | 219                      | 0.17978 | 0.82022 | <b>267</b>   | 0.02884 |
| chr3R | dme-mir-279    | 514                    | 1492                     | 0.25608 | 0.74392 | <b>2006</b>  | 0.21661 |
| chr2L | dme-mir-965    | 210                    | 567                      | 0.26989 | 0.73011 | <b>777</b>   | 0.08387 |
| chr2R | dme-mir-987    | 14                     | 36                       | 0.28571 | 0.71429 | <b>50</b>    | 0.00544 |
| chr2L | dme-mir-305-as | 3                      | 7                        | 0.31373 | 0.68627 | <b>10</b>    | 0.0011  |
| chr3R | dme-mir-92a    | 3                      | 7                        | 0.31373 | 0.68627 | <b>10</b>    | 0.0011  |
| chr3L | dme-mir-957    | 3                      | 7                        | 0.31373 | 0.68627 | <b>10</b>    | 0.0011  |
| chr2R | dme-mir-307-as | 8                      | 17                       | 0.32000 | 0.68000 | <b>25</b>    | 0.0027  |
| chr3L | dme-mir-276a   | 1853                   | 3728                     | 0.33200 | 0.66800 | <b>5581</b>  | 0.60273 |
| chr3L | dme-mir-285    | 19                     | 38                       | 0.33566 | 0.66434 | <b>57</b>    | 0.00618 |

At least 10 normalized reads in the summed normalized reads were required. M: male ; F: female.

A ratio (F/M+F) >=0.66 is female biased in salivary glands (S. glands). A ratio( M/M+F) >=0.66 is male biased.
