# Supplementary material
Source: PubMed Central journal article supplement (PMC4196619)
Supplement: supp_114.169268_TableS4.pdf [file supp_114.169268_TableS4.pdf]

**TABLE S4: Male and female biased miRNAs in adult heads**

**Male biased**

| chrom | miRNA          | Male Head<br>reads | Female Head<br>reads | M/M+F   | F/M+F   | Sum Reads     | % miRNA  |
|-------|----------------|--------------------|----------------------|---------|---------|---------------|----------|
| chrX  | dme-mir-974    | 9                  | 2                    | 0.81405 | 0.18595 | <b>11</b>     | 0.000247 |
| chr3L | dme-mir-190    | 2189               | 634                  | 0.77540 | 0.22460 | <b>2823</b>   | 0.06472  |
| chr2L | dme-mir-305-as | 21                 | 8                    | 0.72426 | 0.27574 | <b>29</b>     | 0.000665 |
| chr3L | dme-mir-276    | 119752             | 58112                | 0.67328 | 0.32672 | <b>177864</b> | 4.077941 |
| chr2R | dme-mir-1008   | 208                | 104                  | 0.66707 | 0.33293 | <b>312</b>    | 0.007162 |

**Female biased**

| chrom | miRNA         | Male Head<br>reads | Female Head<br>reads | M/M+F   | F/M+F   | Sum Reads     | % miRNA  |
|-------|---------------|--------------------|----------------------|---------|---------|---------------|----------|
| chr3L | dme-mir-958   | 5                  | 29                   | 0.15336 | 0.84664 | <b>34</b>     | 0.000785 |
| chrX  | dme-mir-31b   | 12                 | 44                   | 0.21788 | 0.78212 | <b>56</b>     | 0.00129  |
| chr2L | dme-mir-964   | 12                 | 41                   | 0.23015 | 0.76985 | <b>53</b>     | 0.001221 |
| chr3L | dme-mir-956   | 7                  | 20                   | 0.25938 | 0.74062 | <b>27</b>     | 0.000619 |
| chrX  | dme-mir-980   | 611                | 1464                 | 0.29450 | 0.70550 | <b>2075</b>   | 0.047577 |
| chrX  | dme-mir-981   | 404                | 968                  | 0.29472 | 0.70528 | <b>1372</b>   | 0.031468 |
| chr3L | dme-mir-274   | 24301              | 55708                | 0.30373 | 0.69627 | <b>80009</b>  | 1.834398 |
| chr3L | dme-mir-314   | 32                 | 72                   | 0.30448 | 0.69552 | <b>104</b>    | 0.002373 |
| chr2L | dme-mir-961   | 9                  | 20                   | 0.30448 | 0.69552 | <b>29</b>     | 0.000659 |
| chr2L | dme-mir-963   | 9                  | 20                   | 0.30448 | 0.69552 | <b>29</b>     | 0.000659 |
| chr3R | dme-mir-284   | 907                | 2009                 | 0.31105 | 0.68895 | <b>2916</b>   | 0.066857 |
| chr2R | dme-mir-286   | 7                  | 15                   | 0.31831 | 0.68169 | <b>22</b>     | 0.000504 |
| chr2L | dme-mir-275   | 1170               | 2503                 | 0.31849 | 0.68151 | <b>3673</b>   | 0.084205 |
| chrX  | dme-mir-13b-2 | 47                 | 101                  | 0.31885 | 0.68115 | <b>148</b>    | 0.0034   |
| chr2R | dme-mir-986   | 475                | 1006                 | 0.32052 | 0.67948 | <b>1481</b>   | 0.033945 |
| chrX  | dme-mir-210   | 54115              | 106957               | 0.33597 | 0.66403 | <b>161072</b> | 3.692947 |
| chr3R | dme-mir-11    | 10872              | 21450                | 0.33637 | 0.66363 | <b>32322</b>  | 0.741065 |
| chr2L | dme-mir-960   | 53                 | 103                  | 0.33776 | 0.66224 | <b>156</b>    | 0.003566 |
| chr2L | dme-mir-133   | 8468               | 16473                | 0.33953 | 0.66047 | <b>24941</b>  | 0.571834 |

At least 10 normalized reads in the summed normalized reads were required.

A ratio (F/M+F) >=0.66 is female biased in the head. A ratio(M/M+F) >=0.66 is male biased. F: female; M: Male.
