# Supplementary material
Source: PubMed Central journal article supplement (PMC4196619)
Supplement: supp_114.169268_TableS5.pdf [file supp_114.169268_TableS5.pdf]

**TABLE S5: Male vs. female biased miRNAs in the adult body**

**Male body biased**

| chrom | miRNA        | Male Body<br>reads | Female Body<br>reads | M/M+F   | F/M+F   | Sum Reads    | % miRNA     |
|-------|--------------|--------------------|----------------------|---------|---------|--------------|-------------|
| chrX  | dme-mir-972  | 61                 | 0                    | 1       | 0       | <b>61</b>    | 0.001355886 |
| chrX  | dme-mir-975  | 33                 | 0                    | 1       | 0       | <b>33</b>    | 0.000733512 |
| chrX  | dme-mir-977  | 680                | 0                    | 1       | 0       | <b>680</b>   | 0.015114796 |
| chrX  | dme-mir-979  | 21                 | 0                    | 1       | 0       | <b>21</b>    | 0.00046678  |
| chr3R | dme-mir-997  | 184                | 0                    | 1       | 0       | <b>184</b>   | 0.004089886 |
| chrX  | dme-mir-978  | 241                | 3                    | 0.98597 | 0.01403 | <b>244</b>   | 0.00543307  |
| chrX  | dme-mir-974  | 236                | 3                    | 0.98568 | 0.01432 | <b>239</b>   | 0.005321932 |
| chrX  | dme-mir-976  | 380                | 7                    | 0.98227 | 0.01773 | <b>387</b>   | 0.008598921 |
| chr2L | dme-mir-959  | 478                | 10                   | 0.97894 | 0.02106 | <b>488</b>   | 0.010853439 |
| chrX  | dme-mir-303  | 142                | 3                    | 0.97642 | 0.02358 | <b>145</b>   | 0.003232534 |
| chrX  | dme-mir-985  | 214                | 7                    | 0.96895 | 0.03105 | <b>221</b>   | 0.004909133 |
| chrX  | dme-mir-983  | 724                | 24                   | 0.96791 | 0.03209 | <b>748</b>   | 0.016626275 |
| chrX  | dme-mir-984  | 551                | 24                   | 0.95826 | 0.04174 | <b>575</b>   | 0.012780893 |
| chrX  | dme-mir-973  | 76                 | 3                    | 0.95683 | 0.04317 | <b>79</b>    | 0.00176551  |
| chr2L | dme-mir-963  | 368                | 21                   | 0.94706 | 0.05294 | <b>389</b>   | 0.008637026 |
| chr2R | dme-mir-991  | 120                | 7                    | 0.94595 | 0.05405 | <b>127</b>   | 0.002819735 |
| chr2L | dme-mir-960  | 1717               | 117                  | 0.93642 | 0.06358 | <b>1834</b>  | 0.040755964 |
| chr2R | dme-mir-992  | 45                 | 3                    | 0.92920 | 0.07080 | <b>48</b>    | 0.001076453 |
| chr2L | dme-mir-964  | 437                | 34                   | 0.92725 | 0.07275 | <b>471</b>   | 0.010475569 |
| chrX  | dme-mir-982  | 118                | 10                   | 0.91982 | 0.08018 | <b>128</b>   | 0.002851489 |
| chr2L | dme-mir-961  | 177                | 17                   | 0.91170 | 0.08830 | <b>194</b>   | 0.004315337 |
| chr3L | dme-mir-285  | 76                 | 14                   | 0.84713 | 0.15287 | <b>90</b>    | 0.001994137 |
| chr2R | dme-mir-1009 | 38                 | 10                   | 0.78698 | 0.21302 | <b>48</b>    | 0.001073277 |
| chr3L | dme-mir-193  | 12                 | 3                    | 0.77778 | 0.22222 | <b>15</b>    | 0.000342941 |
| chr2L | dme-mir-962  | 401                | 134                  | 0.74993 | 0.25007 | <b>535</b>   | 0.011885434 |
| chrX  | dme-mir-304  | 17186              | 7227                 | 0.70396 | 0.29604 | <b>24413</b> | 0.542652738 |
| chrX  | dme-mir-12   | 21306              | 9603                 | 0.68930 | 0.31070 | <b>30909</b> | 0.687043433 |
| chr2R | dme-mir-313  | 59                 | 27                   | 0.68264 | 0.31736 | <b>86</b>    | 0.001921103 |

**Female body biased**

| chrom | miRNA         | Male Body<br>reads | Female Body<br>reads | M/M+F   | F/M+F   | Sum Reads     | % miRNA     |
|-------|---------------|--------------------|----------------------|---------|---------|---------------|-------------|
| chr2R | dme-mir-989   | 44                 | 45010                | 0.00098 | 0.99902 | <b>45054</b>  | 1.001449337 |
| chr3R | dme-mir-318   | 4                  | 261                  | 0.01512 | 0.98488 | <b>265</b>    | 0.005880792 |
| chr3R | dme-mir-994   | 4                  | 261                  | 0.01512 | 0.98488 | <b>265</b>    | 0.005880792 |
| chr3R | dme-mir-92b   | 42                 | 233                  | 0.15265 | 0.84735 | <b>275</b>    | 0.006115771 |
| chr2L | dme-mir-966   | 5                  | 21                   | 0.19553 | 0.80447 | <b>26</b>     | 0.000568392 |
| chr2L | dme-mir-2a-1  | 21                 | 75                   | 0.21778 | 0.78222 | <b>96</b>     | 0.002143378 |
| chr3L | dme-mir-190   | 162                | 579                  | 0.21850 | 0.78150 | <b>741</b>    | 0.016480193 |
| chr3L | dme-mir-276   | 47955              | 128270               | 0.27212 | 0.72788 | <b>176225</b> | 3.917056396 |
| chr2L | dme-mir-275   | 1122               | 2616                 | 0.30016 | 0.69984 | <b>3738</b>   | 0.083086855 |
| chr3R | dme-mir-92a   | 254                | 579                  | 0.30477 | 0.69523 | <b>833</b>    | 0.018525136 |
| chrX  | dme-mir-283   | 577                | 1245                 | 0.31676 | 0.68324 | <b>1822</b>   | 0.040489204 |
| chrX  | dme-mir-13b-2 | 92                 | 189                  | 0.32790 | 0.67210 | <b>281</b>    | 0.006236436 |

|       |            |     |      |         |         |             |             |
|-------|------------|-----|------|---------|---------|-------------|-------------|
| chr2L | dme-mir-87 | 908 | 1834 | 0.33111 | 0.66889 | <b>2742</b> | 0.060954495 |
|-------|------------|-----|------|---------|---------|-------------|-------------|

At least 10 normalized reads in the summed normalized reads were required.

A ratio  $(F/M+F) \geq 0.66$  is female biased. A ratio  $(M/M+F) \geq 0.66$  is male biased. F: female; M: male.
