# Supplementary material
Source: PubMed Central journal article supplement (PMC4196619)
Supplement: supp_114.169268_TableS6.pdf [file supp_114.169268_TableS6.pdf]

**TABLE S6: Testis and Ovary biased miRNAs**

**Testis biased**

| chrom | miRNA           | Testes<br>reads | Ovary<br>reads | T/Ov+T  | Ov/T+Ov | Sum Reads | % miRNA      |             |
|-------|-----------------|-----------------|----------------|---------|---------|-----------|--------------|-------------|
| chr2L | dme-mir-1004    | 144             | 0              | 0       | 1       | 0         | <b>144</b>   | 0.01472903  |
| chr2R | dme-mir-137     | 38              | 0              | 0       | 1       | 0         | <b>38</b>    | 0.003886827 |
| chrX  | dme-mir-210     | 10              | 0              | 0       | 1       | 0         | <b>10</b>    | 0.001022849 |
| chr3L | dme-mir-263b    | 13              | 0              | 0       | 1       | 0         | <b>13</b>    | 0.001329704 |
| chr3L | dme-mir-315     | 12              | 0              | 0       | 1       | 0         | <b>12</b>    | 0.001227419 |
| chr2L | dme-mir-375     | 1491            | 0              | 0       | 1       | 0         | <b>1491</b>  | 0.152506835 |
| chrX  | dme-mir-971     | 33              | 0              | 0       | 1       | 0         | <b>33</b>    | 0.003375403 |
| chrX  | dme-mir-972     | 961             | 0              | 0       | 1       | 0         | <b>961</b>   | 0.098295821 |
| chrX  | dme-mir-973     | 51              | 0              | 0       | 1       | 0         | <b>51</b>    | 0.005216532 |
| chrX  | dme-mir-974     | 82              | 0              | 0       | 1       | 0         | <b>82</b>    | 0.008387364 |
| chrX  | dme-mir-975     | 2134            | 0              | 0       | 1       | 0         | <b>2134</b>  | 0.218276047 |
| chrX  | dme-mir-976     | 7525            | 0              | 0       | 1       | 0         | <b>7525</b>  | 0.76969412  |
| chrX  | dme-mir-977     | 8100            | 0              | 0       | 1       | 0         | <b>8100</b>  | 0.828507956 |
| chrX  | dme-mir-978     | 8457            | 0              | 0       | 1       | 0         | <b>8457</b>  | 0.865023677 |
| chrX  | dme-mir-979     | 497             | 0              | 0       | 1       | 0         | <b>497</b>   | 0.050835612 |
| chrX  | dme-mir-981     | 16              | 0              | 0       | 1       | 0         | <b>16</b>    | 0.001636559 |
| chr2R | dme-mir-992     | 395             | 0              | 0       | 1       | 0         | <b>395</b>   | 0.040402548 |
| chr3R | dme-mir-997     | 59              | 0              | 0       | 1       | 0         | <b>59</b>    | 0.006034811 |
| chr3R | dme-mir-iab-4as | 16              | 0              | 0       | 1       | 0         | <b>16</b>    | 0.001636559 |
| chr2L | dme-mir-959     | 17252           | 10             | 0.99943 | 0.00057 |           | <b>17262</b> | 1.765620246 |
| chr2L | dme-mir-964     | 10115           | 12             | 0.99879 | 0.00121 |           | <b>10127</b> | 1.035862826 |
| chr3L | dme-mir-274     | 7928            | 12             | 0.99846 | 0.00154 |           | <b>7940</b>  | 0.812165678 |
| chr2L | dme-mir-963     | 926             | 2              | 0.99737 | 0.00263 |           | <b>928</b>   | 0.094965994 |
| chr2L | dme-mir-960     | 5436            | 27             | 0.99508 | 0.00492 |           | <b>5463</b>  | 0.558772501 |
| chrX  | dme-mir-985     | 321             | 2              | 0.99244 | 0.00756 |           | <b>323</b>   | 0.033083609 |
| chr3L | dme-mir-9a      | 6846            | 98             | 0.98591 | 0.01409 |           | <b>6944</b>  | 0.710248489 |
| chr2L | dme-mir-124     | 151             | 2              | 0.98406 | 0.01594 |           | <b>153</b>   | 0.015695171 |
| chr3R | dme-mir-277     | 9542            | 213            | 0.97819 | 0.02181 |           | <b>9755</b>  | 0.997765528 |
| chr2L | dme-mir-961     | 477             | 12             | 0.97501 | 0.02499 |           | <b>489</b>   | 0.050040643 |
| chr3R | dme-mir-1013    | 54              | 2              | 0.95667 | 0.04333 |           | <b>56</b>    | 0.005773532 |
| chr3R | dme-mir-252     | 990             | 51             | 0.95068 | 0.04932 |           | <b>1041</b>  | 0.106515149 |
| chr2L | dme-mir-133     | 38              | 2              | 0.93953 | 0.06047 |           | <b>40</b>    | 0.004136973 |
| chr2R | dme-mir-991     | 127             | 10             | 0.92848 | 0.07152 |           | <b>137</b>   | 0.01399077  |
| chr2R | dme-mir-988     | 6587            | 523            | 0.92640 | 0.07360 |           | <b>7110</b>  | 0.727282088 |
| chr2R | dme-mir-310     | 3356            | 289            | 0.92082 | 0.07918 |           | <b>3645</b>  | 0.372785458 |
| chrX  | dme-mir-12      | 62228           | 5576           | 0.91776 | 0.08224 |           | <b>67804</b> | 6.935319591 |
| chr2L | dme-mir-932     | 45              | 5              | 0.90196 | 0.09804 |           | <b>50</b>    | 0.005103114 |
| chr3R | dme-mir-1010    | 168             | 20             | 0.89569 | 0.10431 |           | <b>188</b>   | 0.019185036 |
| chr2R | dme-mir-278     | 2426            | 286            | 0.89450 | 0.10550 |           | <b>2712</b>  | 0.277410324 |
| chr3R | dme-mir-2c      | 19              | 2              | 0.88596 | 0.11404 |           | <b>21</b>    | 0.00219356  |
| chrX  | dme-mir-983     | 6732            | 1010           | 0.86954 | 0.13046 |           | <b>7742</b>  | 0.791892449 |
| chr2R | dme-mir-311     | 3582            | 582            | 0.86022 | 0.13978 |           | <b>4164</b>  | 0.425919368 |
| chr2L | dme-mir-962     | 471             | 81             | 0.85372 | 0.14628 |           | <b>552</b>   | 0.05643102  |
| chr2L | dme-mir-125     | 3331            | 614            | 0.84439 | 0.15561 |           | <b>3945</b>  | 0.403497747 |

|       |              |       |      |         |         |              |             |
|-------|--------------|-------|------|---------|---------|--------------|-------------|
| chr3L | dme-mir-316  | 4417  | 814  | 0.84433 | 0.15567 | <b>5231</b>  | 0.535091153 |
| chr2L | dme-let-7    | 11559 | 2179 | 0.84139 | 0.15861 | <b>13738</b> | 1.405191589 |
| chr2R | dme-mir-1008 | 11    | 2    | 0.81811 | 0.18189 | <b>13</b>    | 0.00137528  |
| chr3R | dme-mir-999  | 673   | 179  | 0.79034 | 0.20966 | <b>852</b>   | 0.087098415 |
| chr3R | dme-mir-317  | 4489  | 1294 | 0.77628 | 0.22372 | <b>5783</b>  | 0.591484276 |
| chr2L | dme-mir-305  | 18583 | 6588 | 0.73826 | 0.26174 | <b>25171</b> | 2.574654122 |
| chr3L | dme-mir-956  | 54    | 22   | 0.71043 | 0.28957 | <b>76</b>    | 0.0077747   |
| chr2L | dme-mir-100  | 226   | 93   | 0.70861 | 0.29139 | <b>319</b>   | 0.032621941 |
| chr3R | dme-mir-13a  | 29    | 12   | 0.70341 | 0.29659 | <b>41</b>    | 0.004216993 |
| chrX  | dme-mir-31b  | 875   | 416  | 0.67790 | 0.32210 | <b>1291</b>  | 0.132024129 |

#### Ovary biased

| chrom | miRNA         | Testes<br>reads | Ovary<br>reads | T/Ov+T  | Ov/T+Ov | Sum Reads     | % miRNA     |
|-------|---------------|-----------------|----------------|---------|---------|---------------|-------------|
| chr2R | dme-mir-989   | 6               | 111853         | 0.00005 | 0.99995 | <b>111859</b> | 11.44153945 |
| chr3R | dme-mir-318   | 20              | 44135          | 0.00045 | 0.99955 | <b>44155</b>  | 4.516429825 |
| chr3R | dme-mir-994   | 19              | 18298          | 0.00104 | 0.99896 | <b>18317</b>  | 1.873535481 |
| chr2L | dme-mir-2b-1  | 2               | 460            | 0.00433 | 0.99567 | <b>462</b>    | 0.04723201  |
| chrX  | dme-mir-13b-2 | 1               | 218            | 0.00457 | 0.99543 | <b>219</b>    | 0.022365275 |
| chr3R | dme-mir-996   | 348             | 36033          | 0.00957 | 0.99043 | <b>36381</b>  | 3.72124572  |
| chr3L | dme-bantam    | 687             | 69609          | 0.00977 | 0.99023 | <b>70296</b>  | 7.190174187 |
| chr2R | dme-mir-184   | 540             | 38992          | 0.01366 | 0.98634 | <b>39532</b>  | 4.043561038 |
| chr2R | dme-mir-1009  | 5               | 220            | 0.02221 | 0.97779 | <b>225</b>    | 0.023024561 |
| chr2L | dme-mir-965   | 9               | 355            | 0.02475 | 0.97525 | <b>364</b>    | 0.037191728 |
| chr2L | dme-mir-79    | 219             | 8506           | 0.02510 | 0.97490 | <b>8725</b>   | 0.892408047 |
| chr2L | dme-mir-263a  | 245             | 8899           | 0.02679 | 0.97321 | <b>9144</b>   | 0.935340954 |
| chr3L | dme-mir-33    | 166             | 5092           | 0.03157 | 0.96843 | <b>5258</b>   | 0.537783186 |
| chr2L | dme-mir-2b-2  | 40              | 1091           | 0.03538 | 0.96462 | <b>1131</b>   | 0.115656495 |
| chr2R | dme-mir-308   | 30              | 790            | 0.03659 | 0.96341 | <b>820</b>    | 0.083865693 |
| chr2L | dme-mir-275   | 605             | 15923          | 0.03660 | 0.96340 | <b>16528</b>  | 1.690582725 |
| chr3L | dme-mir-276   | 123             | 3194           | 0.03708 | 0.96292 | <b>3317</b>   | 0.33927167  |
| chr2R | dme-mir-281-2 | 21              | 430            | 0.04652 | 0.95348 | <b>451</b>    | 0.046173672 |
| chr3R | dme-mir-995   | 228             | 4654           | 0.04670 | 0.95330 | <b>4882</b>   | 0.499348725 |
| chr2L | dme-mir-1     | 241             | 3788           | 0.05981 | 0.94019 | <b>4029</b>   | 0.41212676  |
| chr2R | dme-mir-307   | 42              | 599            | 0.06551 | 0.93449 | <b>641</b>    | 0.065581727 |
| chr3R | dme-mir-998   | 84              | 986            | 0.07854 | 0.92146 | <b>1070</b>   | 0.109400756 |
| chr2L | dme-mir-87    | 12              | 139            | 0.07926 | 0.92074 | <b>151</b>    | 0.015485739 |
| chr2L | dme-mir-2a-1  | 13              | 149            | 0.08016 | 0.91984 | <b>162</b>    | 0.016588608 |
| chr2L | dme-mir-1005  | 3               | 34             | 0.08056 | 0.91944 | <b>37</b>     | 0.003808898 |
| chr2R | dme-mir-281-1 | 143             | 1277           | 0.10073 | 0.89927 | <b>1420</b>   | 0.145202936 |
| chr2L | dme-mir-966   | 6               | 51             | 0.10461 | 0.89539 | <b>57</b>     | 0.005866775 |
| chr2L | dme-mir-2a-2  | 112             | 829            | 0.11902 | 0.88098 | <b>941</b>    | 0.096255393 |
| chr3R | dme-mir-929   | 4               | 29             | 0.11995 | 0.88005 | <b>33</b>     | 0.003410891 |
| chr2R | dme-mir-313   | 370             | 1538           | 0.19389 | 0.80611 | <b>1908</b>   | 0.195187234 |
| chrX  | dme-mir-1007  | 6               | 24             | 0.19701 | 0.80299 | <b>30</b>     | 0.003115169 |
| chr3R | dme-mir-284   | 16              | 56             | 0.22146 | 0.77854 | <b>72</b>     | 0.007389916 |
| chr2R | dme-mir-7     | 863             | 2981           | 0.22450 | 0.77550 | <b>3844</b>   | 0.393199821 |
| chr3L | dme-mir-190   | 13              | 44             | 0.22799 | 0.77201 | <b>57</b>     | 0.005832331 |
| chr2L | dme-mir-2b    | 6058            | 20095          | 0.23163 | 0.76837 | <b>26153</b>  | 2.675091471 |

|       |              |       |       |         |         |              |             |
|-------|--------------|-------|-------|---------|---------|--------------|-------------|
| chr2L | dme-mir-2a   | 14216 | 47031 | 0.23211 | 0.76789 | <b>61247</b> | 6.264639548 |
| chrX  | dme-mir-304  | 556   | 1817  | 0.23430 | 0.76570 | <b>2373</b>  | 0.24272887  |
| chr2L | dme-mir-9c   | 2050  | 5715  | 0.26399 | 0.73601 | <b>7765</b>  | 0.794275219 |
| chr2L | dme-mir-306  | 951   | 2472  | 0.27779 | 0.72221 | <b>3423</b>  | 0.350170536 |
| chr3R | dme-mir-13b  | 5212  | 13392 | 0.28015 | 0.71985 | <b>18604</b> | 1.902908343 |
| chr2R | dme-mir-986  | 309   | 736   | 0.29566 | 0.70434 | <b>1045</b>  | 0.106899978 |
| chr3R | dme-mir-1012 | 46    | 98    | 0.31984 | 0.68016 | <b>144</b>   | 0.014710945 |
| chr2R | dme-mir-312  | 1704  | 3546  | 0.32457 | 0.67543 | <b>5250</b>  | 0.537005167 |
| chr2L | dme-mir-9b   | 6727  | 13372 | 0.33469 | 0.66531 | <b>20099</b> | 2.055868849 |

At least 10 normalized reads in the summed normalized reads in male and female gonads are required.

A ratio (Testis/Ovary+Testis)  $\geq 0.66$  is Testis biased. A ratio (Ovary/Ovary +Testis)  $\geq 0.66$  is Ovary biased

T: Testis; Ov: Ovaries
