# Supplementary material
Source: PubMed Central journal article supplement (PMC4196619)
Supplement: supp_114.169268_TableS7.pdf [file supp_114.169268_TableS7.pdf]

TABLE S7: miRNAs with testis vs. male body biases

Male Body (male somatic tissues) biased miRNAs

| chrom | miRNA         | Male Body<br>reads | Testis<br>reads | BM/BM+T | Testis/BM+T | Sum reads     | % miRNA     |
|-------|---------------|--------------------|-----------------|---------|-------------|---------------|-------------|
| chr3R | dme-mir-1014  | 248                | 0               | 0.99831 | 0.00169     | <b>248</b>    | 0.007666282 |
| chr3L | dme-mir-285   | 76                 | 0               | 0.99759 | 0.00241     | <b>76</b>     | 0.002349344 |
| chr2R | dme-mir-5     | 14                 | 0               | 0.99602 | 0.00398     | <b>14</b>     | 0.000432774 |
| chrX  | dme-mir-927   | 41                 | 0               | 0.99575 | 0.00425     | <b>41</b>     | 0.001267409 |
| chr3L | dme-mir-957   | 839                | 0               | 0.99232 | 0.00768     | <b>839</b>    | 0.025935526 |
| chrX  | dme-mir-969   | 27                 | 0               | 0.99135 | 0.00865     | <b>27</b>     | 0.000834636 |
| chr2L | dme-mir-1     | 496888             | 844             | 0.99110 | 0.00890     | <b>497732</b> | 15.38608851 |
| chr3R | dme-mir-993   | 1448               | 4               | 0.99025 | 0.00975     | <b>1452</b>   | 0.044869387 |
| chr3R | dme-mir-1000  | 875                | 4               | 0.98889 | 0.01111     | <b>879</b>    | 0.027156567 |
| chr3L | dme-mir-958   | 7379               | 32              | 0.98709 | 0.01291     | <b>7411</b>   | 0.229076539 |
| chr3R | dme-mir-929   | 1810               | 14              | 0.98579 | 0.01421     | <b>1824</b>   | 0.056384267 |
| chr3L | dme-mir-314   | 11627              | 102             | 0.98057 | 0.01943     | <b>11729</b>  | 0.362556399 |
| chr3L | dme-mir-276   | 47955              | 431             | 0.97286 | 0.02714     | <b>48386</b>  | 1.495713233 |
| chr3L | dme-bantam    | 244113             | 2405            | 0.97235 | 0.02765     | <b>246518</b> | 7.620454209 |
| chr2L | dme-mir-2b-1  | 623                | 7               | 0.96967 | 0.03033     | <b>630</b>    | 0.019474829 |
| chr2R | dme-mir-987   | 803                | 11              | 0.96335 | 0.03665     | <b>814</b>    | 0.025147259 |
| chr2R | dme-mir-281-2 | 5100               | 74              | 0.96175 | 0.03825     | <b>5174</b>   | 0.159925441 |
| chr3L | dme-mir-276b  | 530                | 11              | 0.96000 | 0.04000     | <b>541</b>    | 0.016708167 |
| chr2L | dme-mir-965   | 1129               | 32              | 0.95829 | 0.04171     | <b>1161</b>   | 0.035873872 |
| chr2R | dme-mir-281-1 | 17602              | 501             | 0.95579 | 0.04421     | <b>18103</b>  | 0.559592219 |
| chr3R | dme-mir-10    | 19132              | 599             | 0.94667 | 0.05333     | <b>19731</b>  | 0.609917652 |
| chrX  | dme-mir-13b-2 | 92                 | 4               | 0.94312 | 0.05688     | <b>96</b>     | 0.002952137 |
| chr3L | dme-mir-263b  | 1144               | 46              | 0.94063 | 0.05937     | <b>1190</b>   | 0.036770333 |
| chr3R | dme-mir-996   | 29997              | 1218            | 0.93805 | 0.06195     | <b>31215</b>  | 0.964931435 |
| chr3L | dme-mir-219   | 84                 | 4               | 0.93348 | 0.06652     | <b>88</b>     | 0.002704837 |
| chr3L | dme-mir-956   | 4342               | 189             | 0.93241 | 0.06759     | <b>4531</b>   | 0.140064211 |
| chr2L | dme-mir-87    | 908                | 42              | 0.92117 | 0.07883     | <b>950</b>    | 0.029366807 |
| chr2R | dme-mir-308   | 1864               | 105             | 0.92075 | 0.07925     | <b>1969</b>   | 0.060866571 |
| chr3L | dme-mir-33    | 9633               | 581             | 0.92008 | 0.07992     | <b>10214</b>  | 0.315739544 |
| chr2L | dme-mir-79    | 12143              | 767             | 0.90328 | 0.09672     | <b>12910</b>  | 0.399063995 |
| chr3R | dme-mir-1001  | 106                | 7               | 0.89855 | 0.10145     | <b>113</b>    | 0.003493104 |
| chr2R | dme-mir-307   | 2063               | 147             | 0.89829 | 0.10171     | <b>2210</b>   | 0.068316467 |
| chr2L | dme-mir-263a  | 11829              | 858             | 0.89028 | 0.10972     | <b>12687</b>  | 0.392170527 |
| chrX  | dme-mir-210   | 409                | 35              | 0.88898 | 0.11102     | <b>444</b>    | 0.013725119 |
| chr2L | dme-mir-1005  | 122                | 11              | 0.88770 | 0.11230     | <b>133</b>    | 0.004095897 |
| chr3L | dme-mir-276a  | 90583              | 7868            | 0.88703 | 0.11297     | <b>98451</b>  | 3.043359558 |
| chr3R | dme-mir-284   | 523                | 56              | 0.88703 | 0.11297     | <b>579</b>    | 0.017898297 |
| chr3R | dme-mir-1015  | 62                 | 7               | 0.88703 | 0.11297     | <b>69</b>     | 0.002132958 |
| chrX  | dme-mir-304   | 17186              | 1946            | 0.88703 | 0.11297     | <b>19132</b>  | 0.591416607 |
| chr2R | dme-mir-184   | 15336              | 1890            | 0.88703 | 0.11297     | <b>17226</b>  | 0.53249752  |
| chr2L | dme-mir-133   | 1065               | 133             | 0.88703 | 0.11297     | <b>1198</b>   | 0.037033091 |
| chr2L | dme-mir-1006  | 415                | 53              | 0.88703 | 0.11297     | <b>468</b>    | 0.014451561 |
| chr3R | dme-mir-13a   | 797                | 102             | 0.88703 | 0.11297     | <b>899</b>    | 0.027774818 |
| chr3R | dme-mir-1017  | 25                 | 4               | 0.87719 | 0.12281     | <b>29</b>     | 0.000881004 |

|       |                 |        |        |         |         |               |             |
|-------|-----------------|--------|--------|---------|---------|---------------|-------------|
| chr2R | dme-mir-31a     | 24842  | 3969   | 0.86224 | 0.13776 | <b>28811</b>  | 0.890618047 |
| chrX  | dme-mir-980     | 2995   | 539    | 0.84748 | 0.15252 | <b>3534</b>   | 0.109244532 |
| chr2L | dme-mir-124     | 2863   | 529    | 0.84417 | 0.15583 | <b>3392</b>   | 0.104839511 |
| chr2L | dme-mir-2b-2    | 615    | 140    | 0.81457 | 0.18543 | <b>755</b>    | 0.023338886 |
| chr3R | dme-mir-iab-4   | 94     | 25     | 0.79325 | 0.20675 | <b>119</b>    | 0.003663123 |
| chr3R | dme-mir-998     | 1074   | 294    | 0.78509 | 0.21491 | <b>1368</b>   | 0.042288209 |
| chr3L | dme-mir-190     | 162    | 46     | 0.78072 | 0.21928 | <b>208</b>    | 0.00641433  |
| chr2R | dme-mir-1008    | 106    | 39     | 0.73356 | 0.26644 | <b>145</b>    | 0.004466847 |
| chr3R | dme-mir-279     | 14571  | 5439   | 0.72819 | 0.27181 | <b>20010</b>  | 0.618557825 |
| chr2L | dme-mir-2a-2    | 1047   | 392    | 0.72759 | 0.27241 | <b>1439</b>   | 0.044482994 |
| chr3R | dme-mir-iab-4as | 144    | 56     | 0.72000 | 0.28000 | <b>200</b>    | 0.006182487 |
| chr2R | dme-mir-137     | 341    | 133    | 0.71941 | 0.28059 | <b>474</b>    | 0.014652494 |
| chr3L | dme-mir-955     | 59     | 25     | 0.70659 | 0.29341 | <b>84</b>     | 0.002581188 |
| chr3R | dme-mir-277     | 76053  | 33397  | 0.69487 | 0.30513 | <b>109450</b> | 3.383366128 |
| chr2R | dme-mir-8       | 447346 | 198170 | 0.69301 | 0.30699 | <b>645516</b> | 19.95447212 |
| chrX  | dme-mir-1007    | 47     | 21     | 0.69118 | 0.30882 | <b>68</b>     | 0.002102046 |
| chr2R | dme-mir-1009    | 38     | 18     | 0.68468 | 0.31532 | <b>56</b>     | 0.00171564  |
| chr2R | dme-mir-989     | 44     | 21     | 0.67692 | 0.32308 | <b>65</b>     | 0.002009308 |

#### Testis enriched miRNAs

| chrom | miRNA        | Male Body<br>reads | Testis<br>reads | BM/BM+T | Testis/BM+T | Sum Reads     | % miRNA     |
|-------|--------------|--------------------|-----------------|---------|-------------|---------------|-------------|
| chrX  | dme-mir-975  | 33                 | 7469            | 0.00440 | 0.99560     | <b>7502</b>   | 0.231905256 |
| chr2R | dme-mir-310  | 55                 | 11746           | 0.00466 | 0.99534     | <b>11801</b>  | 0.36479791  |
| chr2R | dme-mir-311  | 68                 | 12537           | 0.00539 | 0.99461     | <b>12605</b>  | 0.389651525 |
| chr2L | dme-mir-959  | 478                | 60382           | 0.00785 | 0.99215     | <b>60860</b>  | 1.881332152 |
| chrX  | dme-mir-978  | 241                | 29600           | 0.00808 | 0.99192     | <b>29841</b>  | 0.922443182 |
| chrX  | dme-mir-979  | 21                 | 1740            | 0.01193 | 0.98807     | <b>1761</b>   | 0.054421381 |
| chr2L | dme-mir-964  | 437                | 35403           | 0.01219 | 0.98781     | <b>35840</b>  | 1.107887009 |
| chrX  | dme-mir-976  | 380                | 26338           | 0.01422 | 0.98578     | <b>26718</b>  | 0.825903573 |
| chr2R | dme-mir-312  | 95                 | 5964            | 0.01568 | 0.98432     | <b>6059</b>   | 0.187298577 |
| chr3R | dme-mir-92b  | 42                 | 2615            | 0.01581 | 0.98419     | <b>2657</b>   | 0.082118942 |
| chrX  | dme-mir-972  | 61                 | 3364            | 0.01781 | 0.98219     | <b>3425</b>   | 0.105859709 |
| chrX  | dme-mir-977  | 680                | 28350           | 0.02342 | 0.97658     | <b>29030</b>  | 0.897388622 |
| chrX  | dme-mir-983  | 724                | 23562           | 0.02981 | 0.97019     | <b>24286</b>  | 0.750739922 |
| chr2R | dme-mir-992  | 45                 | 1383            | 0.03152 | 0.96848     | <b>1428</b>   | 0.044127532 |
| chrX  | dme-mir-971  | 4                  | 116             | 0.03347 | 0.96653     | <b>120</b>    | 0.003694039 |
| chr2R | dme-mir-988  | 876                | 23055           | 0.03661 | 0.96339     | <b>23931</b>  | 0.739750538 |
| chr2R | dme-mir-313  | 59                 | 1295            | 0.04357 | 0.95643     | <b>1354</b>   | 0.041855466 |
| chr3R | dme-mir-92a  | 254                | 4984            | 0.04849 | 0.95151     | <b>5238</b>   | 0.161919445 |
| chr3R | dme-mir-318  | 4                  | 70              | 0.05405 | 0.94595     | <b>74</b>     | 0.002287522 |
| chr3R | dme-mir-994  | 4                  | 67              | 0.05674 | 0.94326     | <b>71</b>     | 0.002179328 |
| chr2R | dme-mir-3    | 2                  | 28              | 0.06667 | 0.93333     | <b>30</b>     | 0.000927374 |
| chrX  | dme-mir-984  | 551                | 7704            | 0.06675 | 0.93325     | <b>8255</b>   | 0.255166864 |
| chr2L | dme-mir-1004 | 44                 | 504             | 0.08029 | 0.91971     | <b>548</b>    | 0.016940025 |
| chr2L | dme-mir-960  | 1717               | 19026           | 0.08277 | 0.91723     | <b>20743</b>  | 0.641217054 |
| chr3R | dme-mir-1011 | 1                  | 11              | 0.08696 | 0.91304     | <b>12</b>     | 0.000355493 |
| chrX  | dme-mir-12   | 21306              | 217798          | 0.08911 | 0.91089     | <b>239104</b> | 7.391291592 |
| chr2L | dme-mir-961  | 177                | 1670            | 0.09586 | 0.90414     | <b>1847</b>   | 0.057079847 |

|       |              |       |       |         |         |              |             |
|-------|--------------|-------|-------|---------|---------|--------------|-------------|
| chr2L | dme-mir-963  | 368   | 3241  | 0.10197 | 0.89803 | <b>3609</b>  | 0.111563048 |
| chr3L | dme-mir-274  | 3593  | 27748 | 0.11464 | 0.88536 | <b>31341</b> | 0.968827221 |
| chr3R | dme-mir-317  | 2370  | 15712 | 0.13107 | 0.86893 | <b>18082</b> | 0.558943528 |
| chr2L | dme-mir-9b   | 4263  | 23545 | 0.15330 | 0.84670 | <b>27808</b> | 0.859598032 |
| chrX  | dme-mir-985  | 214   | 1124  | 0.16000 | 0.84000 | <b>1338</b>  | 0.041345405 |
| chr2L | dme-mir-305  | 13965 | 65041 | 0.17676 | 0.82324 | <b>79006</b> | 2.442253734 |
| chr4  | dme-mir-954  | 50    | 217   | 0.18727 | 0.81273 | <b>267</b>   | 0.008253625 |
| chr3R | dme-mir-34   | 9383  | 40124 | 0.18953 | 0.81047 | <b>49507</b> | 1.530382746 |
| chr2L | dme-mir-966  | 5     | 21    | 0.19231 | 0.80769 | <b>26</b>    | 0.000803724 |
| chr2L | dme-mir-962  | 401   | 1649  | 0.19566 | 0.80434 | <b>2050</b>  | 0.063355069 |
| chr2R | dme-mir-991  | 120   | 445   | 0.21258 | 0.78742 | <b>565</b>   | 0.017450079 |
| chr3R | dme-mir-1013 | 52    | 189   | 0.21577 | 0.78423 | <b>241</b>   | 0.007449901 |
| chrX  | dme-mir-982  | 118   | 420   | 0.21933 | 0.78067 | <b>538</b>   | 0.016630899 |
| chr2L | dme-mir-306  | 1152  | 3329  | 0.25711 | 0.74289 | <b>4481</b>  | 0.13850323  |
| chr3L | dme-mir-316  | 5546  | 15460 | 0.26403 | 0.73597 | <b>21006</b> | 0.649331456 |
| chrX  | dme-mir-303  | 142   | 396   | 0.26419 | 0.73581 | <b>538</b>   | 0.016615442 |
| chr3R | dme-mir-2c   | 27    | 67    | 0.28877 | 0.71123 | <b>94</b>    | 0.002890314 |
| chrX  | dme-mir-973  | 76    | 179   | 0.29862 | 0.70138 | <b>255</b>   | 0.007867218 |
| chr3R | dme-mir-11   | 14438 | 32372 | 0.30844 | 0.69156 | <b>46810</b> | 1.446996236 |
| chr2L | dme-mir-125  | 5238  | 11659 | 0.31000 | 0.69000 | <b>16897</b> | 0.522312177 |
| chrX  | dme-mir-283  | 577   | 1257  | 0.31470 | 0.68530 | <b>1834</b>  | 0.056677973 |
| chr2L | dme-mir-2a-1 | 21    | 46    | 0.31579 | 0.68421 | <b>67</b>    | 0.002055678 |
| chr3L | dme-mir-193  | 12    | 25    | 0.32877 | 0.67123 | <b>37</b>    | 0.001128304 |

At least 10 normalized reads in the summed normalized reads were required. A ratio (BodyM/BodyM+Testis)  $\geq 0.66$  is male body biased. A ratio (Testis/Body M+Testis)  $\geq 0.66$  is testis biased. BM: Body Male; T: testis
