# Supplementary material
Source: PubMed Central journal article supplement (PMC4196619)
Supplement: supp_114.169268_TableS8.pdf [file supp_114.169268_TableS8.pdf]

**TABLE S8: Adult Female Body vs. Ovary biased miRNAs**

**Female Body (female somatic tissues) biased:**

| chrom | miRNA           | Female Body reads | Ovary reads | BF/BF+Ov | BF/BF+Ov | Sum Reads     | % miRNA     |
|-------|-----------------|-------------------|-------------|----------|----------|---------------|-------------|
| chr3R | dme-mir-1000    | 206               | 0           | 1        | 0        | <b>206</b>    | 0.016796842 |
| chr3R | dme-mir-1001    | 29                | 0           | 1        | 0        | <b>29</b>     | 0.002364604 |
| chr2L | dme-mir-1004    | 13                | 0           | 1        | 0        | <b>13</b>     | 0.001059995 |
| chr3R | dme-mir-1014    | 66                | 0           | 1        | 0        | <b>66</b>     | 0.005381513 |
| chr3R | dme-mir-1015    | 15                | 0           | 1        | 0        | <b>15</b>     | 0.001223071 |
| chr2R | dme-mir-137     | 80                | 0           | 1        | 0        | <b>80</b>     | 0.006523046 |
| chrX  | dme-mir-210     | 121               | 0           | 1        | 0        | <b>121</b>    | 0.009866106 |
| chr3L | dme-mir-219     | 21                | 0           | 1        | 0        | <b>21</b>     | 0.001712299 |
| chr3L | dme-mir-263b    | 263               | 0           | 1        | 0        | <b>263</b>    | 0.021444512 |
| chr3L | dme-mir-276b    | 112               | 0           | 1        | 0        | <b>112</b>    | 0.009132264 |
| chr2L | dme-mir-375     | 811               | 0           | 1        | 0        | <b>811</b>    | 0.066127374 |
| chr3L | dme-mir-957     | 307               | 0           | 1        | 0        | <b>307</b>    | 0.025032187 |
| chr3L | dme-mir-958     | 2103              | 0           | 1        | 0        | <b>2103</b>   | 0.171474559 |
| chrX  | dme-mir-981     | 19                | 0           | 1        | 0        | <b>19</b>     | 0.001549223 |
| chr2R | dme-mir-987     | 308               | 0           | 1        | 0        | <b>308</b>    | 0.025113725 |
| chr3R | dme-mir-993     | 314               | 0           | 1        | 0        | <b>314</b>    | 0.025602954 |
| chr3R | dme-mir-iab-4as | 28                | 0           | 1        | 0        | <b>28</b>     | 0.002283066 |
| chr2L | dme-mir-124     | 470               | 2           | 0.99590  | 0.00410  | <b>472</b>    | 0.038480513 |
| chr2L | dme-mir-133     | 300               | 2           | 0.99360  | 0.00640  | <b>302</b>    | 0.024619041 |
| chr3L | dme-mir-314     | 4449              | 31          | 0.99310  | 0.00690  | <b>4480</b>   | 0.365284793 |
| chr3L | dme-mir-274     | 1179              | 10          | 0.99187  | 0.00813  | <b>1189</b>   | 0.096921485 |
| chr3R | dme-mir-277     | 19989             | 168         | 0.99166  | 0.00834  | <b>20157</b>  | 1.643577423 |
| chr3L | dme-mir-9a      | 8813              | 77          | 0.99130  | 0.00870  | <b>8890</b>   | 0.724899812 |
| chr3L | dme-mir-956     | 1393              | 17          | 0.98766  | 0.01234  | <b>1410</b>   | 0.115001112 |
| chr3R | dme-mir-10      | 6256              | 79          | 0.98749  | 0.01251  | <b>6335</b>   | 0.51656459  |
| chr2L | dme-mir-1       | 199357            | 2994        | 0.98520  | 0.01480  | <b>202351</b> | 16.4993386  |
| chr3R | dme-mir-929     | 819               | 23          | 0.97246  | 0.02754  | <b>842</b>    | 0.068671122 |
| chr3R | dme-mir-252     | 1420              | 41          | 0.97221  | 0.02779  | <b>1461</b>   | 0.119094084 |
| chr3R | dme-mir-13a     | 202               | 10          | 0.95434  | 0.04566  | <b>212</b>    | 0.017258791 |
| chr2R | dme-mir-1008    | 36                | 2           | 0.94904  | 0.05096  | <b>38</b>     | 0.003092991 |
| chr2L | dme-mir-932     | 70                | 4           | 0.94766  | 0.05234  | <b>74</b>     | 0.006022905 |
| chr3R | dme-mir-iab-4   | 35                | 2           | 0.94766  | 0.05234  | <b>37</b>     | 0.003011453 |
| chr3L | dme-mir-276     | 37412             | 2525        | 0.93678  | 0.06322  | <b>39937</b>  | 3.256354306 |
| chr3L | dme-mir-955     | 26                | 2           | 0.93080  | 0.06920  | <b>28</b>     | 0.00227761  |
| chr2L | dme-mir-1006    | 101               | 8           | 0.92889  | 0.07111  | <b>109</b>    | 0.008865826 |
| chr3R | dme-mir-1013    | 24                | 2           | 0.92546  | 0.07454  | <b>26</b>     | 0.002114534 |
| chr3L | dme-mir-276a    | 31855             | 2710        | 0.92159  | 0.07841  | <b>34565</b>  | 2.818378803 |
| chr2R | dme-mir-278     | 2040              | 226         | 0.90020  | 0.09980  | <b>2266</b>   | 0.184779232 |
| chrX  | dme-mir-980     | 908               | 106         | 0.89518  | 0.10482  | <b>1014</b>   | 0.082705681 |
| chr2R | dme-mir-31a     | 11038             | 1703        | 0.86633  | 0.13367  | <b>12741</b>  | 1.038880662 |
| chr3R | dme-mir-1010    | 92                | 15          | 0.85610  | 0.14390  | <b>107</b>    | 0.008762464 |
| chr3R | dme-mir-999     | 771               | 141         | 0.84529  | 0.15471  | <b>912</b>    | 0.074372131 |
| chr2R | dme-mir-281-1   | 5351              | 1009        | 0.84134  | 0.15866  | <b>6360</b>   | 0.518587988 |
| chr3R | dme-mir-2c      | 10                | 2           | 0.83801  | 0.16199  | <b>12</b>     | 0.000973001 |

|       |               |        |       |         |         |               |             |
|-------|---------------|--------|-------|---------|---------|---------------|-------------|
| chr2R | dme-mir-281-2 | 1730   | 340   | 0.83566 | 0.16434 | <b>2070</b>   | 0.168802027 |
| chr2L | dme-mir-100   | 366    | 73    | 0.83285 | 0.16715 | <b>439</b>    | 0.035832503 |
| chr3L | dme-mir-190   | 169    | 35    | 0.82926 | 0.17074 | <b>204</b>    | 0.016617099 |
| chr2L | dme-mir-87    | 535    | 110   | 0.82922 | 0.17078 | <b>645</b>    | 0.052607222 |
| chr2L | dme-let-7     | 8023   | 1722  | 0.82326 | 0.17674 | <b>9745</b>   | 0.794619587 |
| chr2R | dme-mir-8     | 191101 | 44755 | 0.81024 | 0.18976 | <b>235856</b> | 19.23123099 |
| chr2L | dme-mir-125   | 1718   | 485   | 0.77977 | 0.22023 | <b>2203</b>   | 0.17964509  |
| chr3R | dme-mir-279   | 4143   | 1208  | 0.77422 | 0.22578 | <b>5351</b>   | 0.436324888 |
| chr3L | dme-mir-316   | 1713   | 644   | 0.72686 | 0.27314 | <b>2357</b>   | 0.192162262 |
| chr3R | dme-mir-284   | 116    | 44    | 0.72292 | 0.27708 | <b>160</b>    | 0.013083682 |

#### Ovary enriched miRNAs:

| chrom | miRNA         | Female Body reads | Ovary reads | BF/BF+Ov | Ov/BF+Ov | Sum Reads     | % miRNA     |
|-------|---------------|-------------------|-------------|----------|----------|---------------|-------------|
| chr3R | dme-mir-318   | 76                | 34886       | 0.00217  | 0.99783  | <b>34962</b>  | 2.850769902 |
| chrX  | dme-mir-984   | 7                 | 1378        | 0.00505  | 0.99495  | <b>1385</b>   | 0.112954019 |
| chr3R | dme-mir-994   | 76                | 14463       | 0.00523  | 0.99477  | <b>14539</b>  | 1.185511752 |
| chr2R | dme-mir-313   | 8                 | 1216        | 0.00654  | 0.99346  | <b>1224</b>   | 0.099795454 |
| chrX  | dme-mir-303   | 1                 | 128         | 0.00778  | 0.99222  | <b>129</b>    | 0.010484476 |
| chrX  | dme-mir-983   | 7                 | 798         | 0.00869  | 0.99131  | <b>805</b>    | 0.065667938 |
| chr2R | dme-mir-312   | 40                | 2803        | 0.01407  | 0.98593  | <b>2843</b>   | 0.231810914 |
| chr2R | dme-mir-1009  | 3                 | 174         | 0.01695  | 0.98305  | <b>177</b>    | 0.014430438 |
| chr2R | dme-mir-311   | 13                | 460         | 0.02748  | 0.97252  | <b>473</b>    | 0.038573619 |
| chrX  | dme-mir-982   | 3                 | 89          | 0.03264  | 0.96736  | <b>92</b>     | 0.007495147 |
| chr2R | dme-mir-310   | 9                 | 228         | 0.03796  | 0.96204  | <b>237</b>    | 0.019333034 |
| chr2L | dme-mir-275   | 763               | 12586       | 0.05716  | 0.94284  | <b>13349</b>  | 1.088479123 |
| chr3R | dme-mir-92b   | 68                | 990         | 0.06429  | 0.93571  | <b>1058</b>   | 0.086246167 |
| chr3R | dme-mir-92a   | 169               | 1514        | 0.10044  | 0.89956  | <b>1683</b>   | 0.137196605 |
| chr3R | dme-mir-995   | 459               | 3679        | 0.11093  | 0.88907  | <b>4138</b>   | 0.337377347 |
| chr2L | dme-mir-966   | 6                 | 41          | 0.12877  | 0.87123  | <b>47</b>     | 0.003799254 |
| chr2R | dme-mir-989   | 13128             | 88414       | 0.12929  | 0.87071  | <b>101542</b> | 8.279510048 |
| chr2L | dme-mir-9b    | 1608              | 10570       | 0.13204  | 0.86796  | <b>12178</b>  | 0.99298085  |
| chr2L | dme-mir-2a-1  | 22                | 118         | 0.15723  | 0.84277  | <b>140</b>    | 0.011408674 |
| chr2L | dme-mir-306   | 499               | 1954        | 0.20340  | 0.79660  | <b>2453</b>   | 0.200041589 |
| chr2R | dme-mir-184   | 7879              | 30821       | 0.20359  | 0.79641  | <b>38700</b>  | 3.155536026 |
| chr4  | dme-mir-954   | 11                | 43          | 0.20550  | 0.79450  | <b>54</b>     | 0.004364565 |
| chr3R | dme-mir-996   | 8051              | 28482       | 0.22038  | 0.77962  | <b>36533</b>  | 2.978840048 |
| chrX  | dme-mir-13b-2 | 55                | 172         | 0.24224  | 0.75776  | <b>227</b>    | 0.018512798 |
| chr2L | dme-mir-79    | 2196              | 6723        | 0.24621  | 0.75379  | <b>8919</b>   | 0.727260898 |
| chr2L | dme-mir-2b-2  | 319               | 862         | 0.27007  | 0.72993  | <b>1181</b>   | 0.096309284 |
| chr2L | dme-mir-959   | 3                 | 8           | 0.27953  | 0.72047  | <b>11</b>     | 0.000875095 |
| chr2R | dme-mir-7     | 928               | 2356        | 0.28254  | 0.71746  | <b>3284</b>   | 0.267806437 |
| chr3L | dme-mir-33    | 1974              | 4025        | 0.32907  | 0.67093  | <b>5999</b>   | 0.48912155  |
| chr3R | dme-mir-34    | 3245              | 6344        | 0.33839  | 0.66161  | <b>9589</b>   | 0.781900759 |

At least 10 normalized reads in summed normalized reads were required. A ratio (BodyF/BodyF+Ovary)  $\geq 0.66$  is female body biased and a ratio (Ovary/Body M+Ovary)  $\geq 0.66$  is ovary biased. BF: Body Female; Ov: Ovary.
