# Supplementary material
Source: PubMed Central journal article supplement (PMC4196619)
Supplement: supp_114.169268_TableS9.pdf [file supp_114.169268_TableS9.pdf]

TABLE S9: Raw Counts miRNA-Seq

| Chrom    | miRNA           | Late Embryo Lymphoid Cells |        | L3 Larvae Salivary Glands |             | Adult Head |        | Adult Body |        | Adult Gonads |       |
|----------|-----------------|----------------------------|--------|---------------------------|-------------|------------|--------|------------|--------|--------------|-------|
|          |                 | S2 (M)                     | Kc (F) | S. Glands M               | S. Glands F | Head M     | Head F | Body M     | Body F | Testis       | Ovary |
| chr3L    | dme-bantam      | 35460                      | 18240  | 12348                     | 24423       | 103920     | 152727 | 244113     | 72941  | 28463        | 687   |
| chr2L    | dme-let-7       | 5                          | 5      | 30                        | 219         | 20606      | 51163  | 28931      | 8023   | 891          | 11559 |
| chr2L    | dme-let-7-as    | 0                          | 0      | 0                         | 0           | 0          | 0      | 0          | 0      | 0            | 0     |
| chr2L    | dme-mir-1       | 23                         | 55     | 679                       | 1503        | 126814     | 175008 | 496888     | 199357 | 1549         | 241   |
| chr3R    | dme-mir-10      | 1                          | 18     | 199                       | 395         | 3730       | 4794   | 19132      | 6256   | 41           | 171   |
| chr2L    | dme-mir-100     | 0                          | 0      | 1                         | 10          | 1004       | 1527   | 1103       | 366    | 38           | 226   |
| chr3R    | dme-mir-1000    | 1                          | 867    | 13                        | 27          | 18668      | 25776  | 875        | 206    | 0            | 1     |
| chr3R    | dme-mir-1001    | 0                          | 0      | 0                         | 0           | 162        | 208    | 106        | 29     | 0            | 2     |
| chr2L    | dme-mir-1002    | 0                          | 0      | 0                         | 0           | 0          | 0      | 0          | 0      | 0            | 0     |
| chr3R    | dme-mir-1003    | 1487                       | 902    | 34                        | 30          | 107        | 228    | 124        | 34     | 16           | 63    |
| chr2L    | dme-mir-1004    | 0                          | 0      | 0                         | 1           | 157        | 253    | 44         | 13     | 0            | 144   |
| chr2L    | dme-mir-1004-as | 0                          | 0      | 0                         | 0           | 1          | 0      | 0          | 0      | 0            | 0     |
| chr2L    | dme-mir-1005    | 1                          | 0      | 16                        | 11          | 101        | 332    | 122        | 44     | 14           | 3     |
| chr2L    | dme-mir-1006    | 58                         | 97     | 71                        | 107         | 315        | 519    | 415        | 101    | 4            | 15    |
| chr2L    | dme-mir-1006-as | 0                          | 0      | 0                         | 0           | 0          | 0      | 0          | 0      | 0            | 0     |
| chrX     | dme-mir-1007    | 13                         | 5      | 0                         | 4           | 109        | 125    | 47         | 19     | 10           | 6     |
| chr2R    | dme-mir-1008    | 94                         | 175    | 8                         | 9           | 119        | 104    | 106        | 36     | 1            | 11    |
| chr2R    | dme-mir-1009    | 4                          | 6      | 5                         | 2           | 30         | 85     | 38         | 3      | 90           | 5     |
| chr3R    | dme-mir-1010    | 1                          | 71     | 1                         | 0           | 851        | 1677   | 319        | 92     | 8            | 168   |
| chr3R    | dme-mir-1011    | 0                          | 0      | 0                         | 0           | 8          | 19     | 1          | 0      | 0            | 3     |
| chr3R    | dme-mir-1012    | 164                        | 42     | 230                       | 346         | 374        | 623    | 215        | 79     | 40           | 46    |
| chr3R    | dme-mir-1013    | 1                          | 4      | 3                         | 4           | 90         | 131    | 52         | 24     | 1            | 54    |
| chr3R    | dme-mir-1014    | 0                          | 0      | 0                         | 0           | 0          | 0      | 248        | 66     | 0            | 0     |
| chr3R    | dme-mir-1015    | 0                          | 0      | 0                         | 0           | 0          | 1      | 62         | 15     | 0            | 2     |
| chr2R    | dme-mir-1016    | 5                          | 4      | 3                         | 4           | 35         | 76     | 18         | 8      | 0            | 6     |
| chr3R    | dme-mir-1017    | 0                          | 0      | 0                         | 0           | 183        | 278    | 25         | 6      | 0            | 1     |
| chr3R    | dme-mir-11      | 15690                      | 9328   | 5007                      | 12439       | 6209       | 21450  | 14438      | 5606   | 3338         | 9249  |
| chrX     | dme-mir-12      | 415                        | 7053   | 16391                     | 43021       | 1117       | 2682   | 21306      | 2801   | 2280         | 62228 |
| chr2L    | dme-mir-124     | 8                          | 63     | 10                        | 16          | 29849      | 48896  | 2863       | 470    | 1            | 151   |
| chr2L    | dme-mir-124-as  | 0                          | 0      | 0                         | 0           | 0          | 0      | 0          | 0      | 0            | 0     |
| chr2L    | dme-mir-125     | 10                         | 3      | 23                        | 63          | 7175       | 20670  | 5238       | 1718   | 251          | 3331  |
| chrX     | dme-mir-12-as   | 0                          | 0      | 0                         | 0           | 0          | 0      | 0          | 0      | 0            | 0     |
| chr2L    | dme-mir-133     | 5                          | 3      | 6                         | 4           | 4836       | 16473  | 1065       | 300    | 1            | 38    |
| chr2R    | dme-mir-137     | 0                          | 2      | 0                         | 1           | 701        | 1301   | 341        | 80     | 0            | 38    |
| chr3R    | dme-mir-13a     | 25                         | 57     | 11                        | 17          | 5608       | 9074   | 797        | 202    | 5            | 29    |
| chr3R    | dme-mir-13b     | 11557                      | 9820   | 5207                      | 12399       | 27953      | 34823  | 21017      | 7131   | 5476         | 5212  |
| chr3R    | dme-mir-13b-1   | 0                          | 0      | 7                         | 9           | 14         | 22     | 4          | 1      | 0            | 0     |
| chrX     | dme-mir-13b-2   | 299                        | 300    | 62                        | 70          | 27         | 101    | 92         | 55     | 89           | 1     |
| chr2R    | dme-mir-14      | 182756                     | 130160 | 2602                      | 2658        | 31243      | 68581  | 26146      | 5504   | 1571         | 6722  |
| chr2R    | dme-mir-14-as   | 0                          | 0      | 0                         | 0           | 2          | 1      | 0          | 0      | 0            | 0     |
| chr2R    | dme-mir-184     | 54062                      | 73256  | 810                       | 1085        | 51441      | 89330  | 15336      | 7879   | 15944        | 540   |
| chr3L    | dme-mir-190     | 171                        | 308    | 130                       | 168         | 1250       | 634    | 162        | 169    | 18           | 13    |
| chr3L    | dme-mir-193     | 3                          | 64     | 0                         | 4           | 1978       | 4491   | 12         | 1      | 1            | 7     |
| chr2L    | dme-mir-1-as    | 0                          | 0      | 0                         | 0           | 0          | 0      | 0          | 0      | 0            | 0     |
| chrX     | dme-mir-210     | 1                          | 1      | 31                        | 29          | 30904      | 106957 | 409        | 121    | 0            | 10    |
| chr3L    | dme-mir-219     | 0                          | 0      | 1                         | 0           | 259        | 437    | 84         | 21     | 0            | 1     |
| chr2RHet | dme-mir-2279    | 8                          | 9      | 2                         | 5           | 7          | 16     | 12         | 3      | 0            | 3     |
| chr2RHet | dme-mir-2279-as | 0                          | 1      | 0                         | 1           | 0          | 0      | 0          | 0      | 0            | 0     |
| chr2L    | dme-mir-2280    | 0                          | 0      | 0                         | 0           | 0          | 0      | 1          | 0      | 0            | 0     |
| chr3R    | dme-mir-2281    | 0                          | 0      | 0                         | 0           | 0          | 1      | 4          | 1      | 0            | 0     |
| chr3L    | dme-mir-2282    | 1                          | 3      | 0                         | 0           | 0          | 0      | 0          | 0      | 0            | 0     |
| chr3R    | dme-mir-2283    | 0                          | 0      | 0                         | 0           | 3          | 3      | 4          | 0      | 0            | 1     |
| chr3R    | dme-mir-252     | 13294                      | 137    | 831                       | 644         | 14416      | 37717  | 4036       | 1420   | 21           | 990   |
| chr2L    | dme-mir-263a    | 66                         | 3      | 27399                     | 39275       | 17316      | 25950  | 11829      | 3892   | 3639         | 245   |
| chr2L    | dme-mir-263a-as | 0                          | 0      | 0                         | 0           | 0          | 0      | 0          | 0      | 0            | 0     |
| chr3L    | dme-mir-263b    | 1                          | 2      | 2                         | 6           | 3141       | 6005   | 1144       | 263    | 0            | 13    |
| chr3L    | dme-mir-274     | 1                          | 0      | 12                        | 16          | 13878      | 55708  | 3593       | 1179   | 5            | 7928  |
| chr2L    | dme-mir-275     | 461                        | 832    | 13608                     | 2588        | 668        | 2503   | 1122       | 763    | 6511         | 605   |
| chr2L    | dme-mir-275-as  | 0                          | 0      | 0                         | 1           | 1          | 1      | 0          | 0      | 0            | 0     |
| chr3L    | dme-mir-276     | 4524                       | 10288  | 1946                      | 5840        | 68388      | 58112  | 47955      | 37412  | 1306         | 123   |
| chr3L    | dme-mir-276a    | 9143                       | 7257   | 1158                      | 3728        | 73713      | 163232 | 90583      | 31855  | 1402         | 2248  |
| chr3L    | dme-mir-276b    | 5                          | 125    | 1                         | 8           | 7324       | 16746  | 530        | 112    | 0            | 3     |
| chr3R    | dme-mir-277     | 3703                       | 1688   | 807                       | 1660        | 59156      | 104947 | 76053      | 19989  | 87           | 9542  |
| chr2R    | dme-mir-278     | 47                         | 1099   | 797                       | 526         | 2829       | 9122   | 4966       | 2040   | 117          | 2426  |
| chr3R    | dme-mir-279     | 16526                      | 10095  | 321                       | 1492        | 8345       | 13021  | 14571      | 4143   | 625          | 1554  |
| chr3R    | dme-mir-279-as  | 0                          | 0      | 0                         | 0           | 0          | 0      | 0          | 0      | 0            | 0     |
| chr2R    | dme-mir-281-1   | 179                        | 132    | 55                        | 118         | 260        | 557    | 17602      | 5351   | 522          | 143   |
| chr2R    | dme-mir-281-2   | 34                         | 23     | 53                        | 84          | 277        | 439    | 5100       | 1730   | 176          | 21    |
| chr3L    | dme-mir-282     | 13543                      | 3084   | 4147                      | 31936       | 6842       | 6760   | 23325      | 12554  | 3427         | 11072 |
| chr3L    | dme-mir-282-as  | 0                          | 0      | 0                         | 0           | 0          | 0      | 0          | 0      | 0            | 0     |
| chrX     | dme-mir-283     | 48                         | 930    | 4683                      | 7791        | 370        | 448    | 577        | 363    | 133          | 359   |
| chr3R    | dme-mir-284     | 0                          | 5      | 2                         | 1           | 518        | 2009   | 523        | 116    | 23           | 16    |
| chr3L    | dme-mir-285     | 0                          | 0      | 12                        | 38          | 40821      | 63213  | 76         | 4      | 0            | 0     |
| chr2R    | dme-mir-286     | 43                         | 14     | 23                        | 31          | 4          | 15     | 5          | 1      | 0            | 0     |
| chr2L    | dme-mir-287     | 0                          | 0      | 0                         | 0           | 0          | 0      | 0          | 1      | 0            | 0     |
| chr3L    | dme-mir-289     | 0                          | 0      | 0                         | 0           | 0          | 0      | 0          | 1      | 0            | 0     |
| chr2L    | dme-mir-2a      | 7839                       | 19872  | 7976                      | 9677        | 40963      | 62518  | 42678      | 21855  | 19231        | 14216 |
| chr2L    | dme-mir-2a-1    | 173                        | 259    | 16                        | 27          | 34         | 64     | 21         | 22     | 61           | 13    |
| chr2L    | dme-mir-2a-2    | 2015                       | 6472   | 112                       | 164         | 1780       | 4486   | 1047       | 363    | 339          | 112   |
| chr2L    | dme-mir-2b      | 9981                       | 13905  | 6378                      | 7854        | 43346      | 58488  | 18220      | 8986   | 8217         | 6058  |
| chr2L    | dme-mir-2b-1    | 498                        | 138    | 461                       | 465         | 1684       | 1927   | 623        | 328    | 188          | 2     |
| chr2L    | dme-mir-2b-2    | 431                        | 1100   | 189                       | 177         | 714        | 1184   | 615        | 319    | 446          | 40    |
| chr3R    | dme-mir-2c      | 9                          | 13     | 3                         | 0           | 163        | 287    | 27         | 10     | 1            | 19    |
| chr2R    | dme-mir-3       | 15                         | 8      | 1                         | 1           | 3          | 5      | 2          | 1      | 3            | 8     |
| chrX     | dme-mir-303     | 7                          | 8      | 0                         | 0           | 1          | 3      | 142        | 1      | 66           | 113   |
| chrX     | dme-mir-304     | 34                         | 841    | 15014                     | 30430       | 1286       | 2492   | 17186      | 2108   | 743          | 556   |
| chrX     | dme-mir-304-as  | 0                          | 0      | 0                         | 0           | 0          | 0      | 0          | 0      | 0            | 0     |
| chr2L    | dme-mir-305     | 3321                       | 6880   | 7165                      | 9763        | 11336      | 20428  | 13965      | 3692   | 2694         | 18583 |
| chr2L    | dme-mir-305-as  | 0                          | 3      | 2                         | 7           | 12         | 8      | 0          | 1      | 1            | 0     |
| chr2L    | dme-mir-306     | 2500                       | 4089   | 1067                      | 1144        | 752        | 2067   | 1152       | 499    | 1011         | 951   |
| chr2R    | dme-mir-307     | 932                        | 22     | 1                         | 0           | 5587       | 15933  | 2063       | 482    | 245          | 42    |
| chr2R    | dme-mir-307-as  | 1                          | 0      | 5                         | 17          | 0          | 3      | 6          | 1      | 0            | 0     |

|       |                 |       |       |       |        |        |        |        |        |       |       |
|-------|-----------------|-------|-------|-------|--------|--------|--------|--------|--------|-------|-------|
| chr2R | dme-mir-308     | 1483  | 1685  | 2781  | 5046   | 1048   | 1674   | 1864   | 684    | 323   | 30    |
| chr2R | dme-mir-309     | 4     | 3     | 1     | 0      | 0      | 1      | 0      | 0      | 0     | 0     |
| chr2R | dme-mir-310     | 8     | 4     | 1     | 0      | 2      | 2      | 55     | 9      | 118   | 3356  |
| chr2R | dme-mir-311     | 8     | 2     | 0     | 0      | 1      | 2      | 68     | 13     | 238   | 3582  |
| chr2R | dme-mir-312     | 3     | 6     | 0     | 0      | 8      | 9      | 95     | 40     | 1450  | 1704  |
| chr2R | dme-mir-313     | 2     | 2     | 0     | 0      | 4      | 4      | 59     | 8      | 629   | 370   |
| chr3L | dme-mir-314     | 0     | 2     | 2     | 3      | 18     | 72     | 11627  | 4449   | 16    | 29    |
| chr3L | dme-mir-314-as  | 0     | 0     | 0     | 0      | 0      | 0      | 0      | 1      | 0     | 0     |
| chr3L | dme-mir-315     | 0     | 0     | 0     | 0      | 1204   | 2424   | 24     | 7      | 0     | 12    |
| chr3L | dme-mir-316     | 0     | 0     | 8     | 14     | 1119   | 3236   | 5546   | 1713   | 333   | 4417  |
| chr3L | dme-mir-316-as  | 0     | 0     | 0     | 0      | 0      | 0      | 1      | 0      | 0     | 0     |
| chr3R | dme-mir-317     | 9157  | 14069 | 718   | 1536   | 8974   | 14533  | 2370   | 561    | 529   | 4489  |
| chr3R | dme-mir-317-as  | 0     | 0     | 0     | 0      | 0      | 0      | 0      | 1      | 0     | 0     |
| chr3R | dme-mir-318     | 13    | 60    | 0     | 1      | 1      | 6      | 4      | 76     | 18047 | 20    |
| chr2R | dme-mir-31a     | 5     | 12    | 521   | 763    | 11606  | 22138  | 24842  | 11038  | 881   | 1134  |
| chrX  | dme-mir-31b     | 3     | 3     | 0     | 0      | 7      | 44     | 2068   | 447    | 170   | 875   |
| chr3L | dme-mir-33      | 1927  | 2696  | 1239  | 2256   | 1864   | 3555   | 9633   | 1974   | 2082  | 166   |
| chr3R | dme-mir-34      | 13980 | 15190 | 1643  | 2983   | 45375  | 77345  | 9383   | 3245   | 3282  | 11464 |
| chr2L | dme-mir-375     | 1     | 0     | 18745 | 34030  | 57     | 182    | 4698   | 811    | 0     | 1491  |
| chr2R | dme-mir-4       | 6     | 2     | 1     | 6      | 3      | 5      | 2      | 0      | 0     | 0     |
| chr2R | dme-mir-5       | 14    | 9     | 18    | 26     | 7      | 22     | 14     | 4      | 4     | 0     |
| chr2R | dme-mir-6-1     | 7     | 1     | 0     | 0      | 0      | 0      | 0      | 0      | 0     | 0     |
| chr2R | dme-mir-6-2     | 1     | 1     | 0     | 0      | 0      | 0      | 0      | 0      | 0     | 0     |
| chr2R | dme-mir-6-3     | 2     | 1     | 0     | 0      | 0      | 0      | 0      | 0      | 0     | 0     |
| chr2R | dme-mir-6-3-as  | 0     | 0     | 0     | 0      | 0      | 0      | 0      | 0      | 0     | 0     |
| chr2R | dme-mir-7       | 332   | 243   | 176   | 270    | 13849  | 20729  | 3010   | 928    | 1219  | 863   |
| chr2L | dme-mir-79      | 2043  | 3617  | 1604  | 3518   | 7700   | 13318  | 12143  | 2196   | 3478  | 219   |
| chr2R | dme-mir-8       | 4003  | 18559 | 84972 | 180692 | 184826 | 244757 | 447346 | 191101 | 23152 | 56620 |
| chr2L | dme-mir-87      | 0     | 2     | 2     | 4      | 2344   | 4107   | 908    | 535    | 57    | 12    |
| chrX  | dme-mir-927     | 0     | 1     | 0     | 0      | 662    | 994    | 41     | 9      | 0     | 0     |
| chr3R | dme-mir-929     | 1     | 2     | 20    | 39     | 12012  | 13343  | 1810   | 819    | 12    | 4     |
| chr3R | dme-mir-929-as  | 0     | 0     | 0     | 0      | 0      | 0      | 2      | 0      | 0     | 0     |
| chr3R | dme-mir-92a     | 13    | 1478  | 2     | 7      | 1421   | 2484   | 254    | 169    | 783   | 1424  |
| chr3R | dme-mir-92a-as  | 0     | 0     | 0     | 0      | 0      | 0      | 0      | 0      | 0     | 0     |
| chr3R | dme-mir-92b     | 20    | 447   | 31    | 64     | 54     | 68     | 42     | 68     | 512   | 747   |
| chr2L | dme-mir-932     | 5     | 118   | 4     | 2      | 3614   | 8766   | 276    | 70     | 2     | 45    |
| chr4  | dme-mir-954     | 11    | 61    | 1     | 1      | 59     | 124    | 50     | 11     | 22    | 62    |
| chr3L | dme-mir-955     | 0     | 0     | 0     | 0      | 54     | 84     | 59     | 26     | 1     | 7     |
| chr3L | dme-mir-956     | 0     | 1     | 0     | 1      | 4      | 20     | 4342   | 1393   | 9     | 54    |
| chr3L | dme-mir-957     | 0     | 0     | 2     | 7      | 6154   | 12255  | 839    | 307    | 0     | 0     |
| chr3L | dme-mir-958     | 1     | 19    | 0     | 1      | 3      | 29     | 7379   | 2103   | 0     | 9     |
| chr2L | dme-mir-959     | 0     | 0     | 0     | 0      | 7      | 18     | 478    | 3      | 4     | 17252 |
| chr2L | dme-mir-960     | 0     | 1     | 0     | 2      | 30     | 103    | 1717   | 34     | 11    | 5436  |
| chr2L | dme-mir-961     | 0     | 0     | 0     | 0      | 5      | 20     | 177    | 5      | 5     | 477   |
| chr2L | dme-mir-962     | 0     | 0     | 1     | 0      | 28     | 55     | 401    | 39     | 33    | 471   |
| chr2L | dme-mir-963     | 0     | 1     | 0     | 0      | 5      | 20     | 368    | 6      | 1     | 926   |
| chr2L | dme-mir-964     | 0     | 0     | 0     | 0      | 7      | 41     | 437    | 10     | 5     | 10115 |
| chr2L | dme-mir-965     | 559   | 608   | 131   | 567    | 361    | 613    | 1129   | 201    | 145   | 9     |
| chr2L | dme-mir-966     | 15    | 39    | 1     | 4      | 8      | 12     | 5      | 6      | 21    | 6     |
| chr2L | dme-mir-967     | 10    | 7     | 0     | 1      | 4      | 2      | 3      | 0      | 0     | 0     |
| chr2L | dme-mir-967-as  | 0     | 0     | 0     | 0      | 0      | 0      | 0      | 1      | 0     | 0     |
| chr2L | dme-mir-968     | 0     | 0     | 0     | 0      | 2      | 3      | 0      | 0      | 0     | 0     |
| chrX  | dme-mir-969     | 0     | 0     | 0     | 2      | 194    | 192    | 27     | 6      | 0     | 0     |
| chrX  | dme-mir-970     | 1140  | 1185  | 177   | 198    | 1442   | 3119   | 656    | 205    | 59    | 100   |
| chrX  | dme-mir-971     | 0     | 35    | 0     | 1      | 40     | 70     | 4      | 0      | 0     | 33    |
| chrX  | dme-mir-972     | 0     | 0     | 0     | 0      | 0      | 1      | 61     | 0      | 0     | 961   |
| chrX  | dme-mir-973     | 0     | 8     | 0     | 0      | 0      | 0      | 76     | 1      | 0     | 51    |
| chrX  | dme-mir-974     | 0     | 2     | 0     | 0      | 5      | 2      | 236    | 1      | 0     | 82    |
| chrX  | dme-mir-975     | 0     | 3     | 0     | 0      | 0      | 0      | 33     | 0      | 0     | 2134  |
| chrX  | dme-mir-976     | 0     | 1     | 0     | 0      | 0      | 2      | 380    | 2      | 0     | 7525  |
| chrX  | dme-mir-977     | 1     | 44    | 0     | 0      | 3      | 4      | 680    | 0      | 0     | 8100  |
| chrX  | dme-mir-978     | 1     | 4     | 0     | 0      | 2      | 3      | 241    | 1      | 0     | 8457  |
| chrX  | dme-mir-979     | 0     | 0     | 0     | 0      | 0      | 0      | 21     | 0      | 0     | 497   |
| chrX  | dme-mir-980     | 1534  | 302   | 3     | 3      | 349    | 1464   | 2995   | 908    | 55    | 154   |
| chrX  | dme-mir-981     | 1     | 952   | 0     | 3      | 231    | 968    | 56     | 19     | 0     | 16    |
| chrX  | dme-mir-981-as  | 1     | 4     | 0     | 0      | 1      | 1      | 0      | 0      | 0     | 0     |
| chrX  | dme-mir-982     | 0     | 11    | 0     | 0      | 1      | 3      | 118    | 3      | 46    | 120   |
| chrX  | dme-mir-983     | 6     | 9     | 0     | 0      | 9      | 16     | 724    | 7      | 413   | 6732  |
| chrX  | dme-mir-983-1   | 0     | 0     | 0     | 0      | 0      | 0      | 1      | 0      | 2     | 1     |
| chrX  | dme-mir-984     | 25    | 68    | 0     | 0      | 10     | 11     | 551    | 7      | 713   | 2201  |
| chrX  | dme-mir-985     | 0     | 0     | 0     | 0      | 1      | 0      | 214    | 2      | 1     | 321   |
| chr2R | dme-mir-986     | 3     | 29    | 211   | 226    | 271    | 1006   | 1880   | 510    | 301   | 309   |
| chr2R | dme-mir-987     | 0     | 3     | 9     | 36     | 14710  | 16043  | 803    | 308    | 0     | 3     |
| chr2R | dme-mir-988     | 13800 | 15082 | 558   | 539    | 620    | 1460   | 876    | 280    | 214   | 6587  |
| chr2R | dme-mir-988-as  | 1     | 0     | 0     | 0      | 0      | 0      | 0      | 0      | 0     | 0     |
| chr2R | dme-mir-989     | 3     | 158   | 14    | 30     | 1      | 6      | 44     | 13128  | 45737 | 6     |
| chr2R | dme-mir-990     | 0     | 0     | 0     | 0      | 382    | 430    | 8      | 2      | 0     | 0     |
| chr2R | dme-mir-991     | 0     | 0     | 0     | 0      | 0      | 1      | 120    | 2      | 4     | 127   |
| chr2R | dme-mir-992     | 2     | 4     | 0     | 0      | 0      | 1      | 45     | 1      | 0     | 395   |
| chr3R | dme-mir-993     | 0     | 1     | 0     | 2      | 982    | 1433   | 1448   | 314    | 0     | 1     |
| chr3R | dme-mir-994     | 5     | 27    | 0     | 2      | 2      | 3      | 4      | 76     | 7482  | 19    |
| chr3R | dme-mir-995     | 3761  | 3754  | 1631  | 3220   | 2255   | 3287   | 909    | 459    | 1903  | 228   |
| chr3R | dme-mir-995-as  | 0     | 0     | 0     | 0      | 0      | 0      | 1      | 0      | 0     | 0     |
| chr3R | dme-mir-996     | 23117 | 10275 | 2982  | 6077   | 10447  | 27396  | 29997  | 8051   | 14734 | 348   |
| chr3R | dme-mir-997     | 0     | 0     | 0     | 0      | 0      | 0      | 184    | 0      | 0     | 59    |
| chr3R | dme-mir-998     | 3118  | 3965  | 2123  | 5021   | 4751   | 5610   | 1074   | 459    | 403   | 84    |
| chr3R | dme-mir-999     | 247   | 374   | 27    | 35     | 7193   | 10562  | 1464   | 771    | 73    | 673   |
| chr3L | dme-mir-9a      | 49    | 83    | 1540  | 2193   | 12061  | 32808  | 28787  | 8813   | 40    | 6846  |
| chr2L | dme-mir-9b      | 2463  | 7931  | 1257  | 1648   | 1557   | 3726   | 4263   | 1608   | 5468  | 6727  |
| chr2L | dme-mir-9c      | 1896  | 3769  | 737   | 920    | 2615   | 5475   | 5508   | 2430   | 2337  | 2050  |
| chr3R | dme-mir-iab-4   | 0     | 1     | 0     | 0      | 2      | 2      | 94     | 35     | 1     | 7     |
| chr3R | dme-mir-iab-4as | 0     | 0     | 0     | 0      | 0      | 1      | 144    | 28     | 0     | 16    |

S. Glands: Salivary Glands; M: Male; F: Female
