# Supplementary material
Source: PubMed Central journal article supplement (PMC4196619)
Supplement: supp_114.169268_TableS10.pdf [file supp_114.169268_TableS10.pdf]

**TABLE S10: Normalized read counts in libraries**

| Chrom    | miRNA           | S2     | Kc     | S. Glands M | S. Glands F | Head M | Head F | Body M | Body F | Testis | Ovary | SUM            |
|----------|-----------------|--------|--------|-------------|-------------|--------|--------|--------|--------|--------|-------|----------------|
| chr3L    | dme-bantam      | 35460  | 27334  | 19757       | 24423       | 181971 | 152727 | 244113 | 250083 | 2405   | 55022 | <b>993293</b>  |
| chr2L    | dme-let-7       | 5      | 7      | 48          | 219         | 36082  | 51163  | 28931  | 27507  | 40457  | 1722  | <b>186142</b>  |
| chr2L    | dme-let-7-as    | 0      | 0      | 0           | 0           | 0      | 0      | 0      | 0      | 0      | 0     | <b>0</b>       |
| chr2L    | dme-mir-1       | 23     | 82     | 1086        | 1503        | 222060 | 175008 | 496888 | 683509 | 844    | 2994  | <b>1583998</b> |
| chr2L    | dme-mir-1-as    | 0      | 0      | 0           | 0           | 0      | 0      | 0      | 0      | 0      | 0     | <b>0</b>       |
| chr3R    | dme-mir-10      | 1      | 27     | 318         | 395         | 6531   | 4794   | 19132  | 21449  | 599    | 79    | <b>53326</b>   |
| chr2L    | dme-mir-100     | 0      | 0      | 2           | 10          | 1758   | 1527   | 1103   | 1255   | 791    | 73    | <b>6519</b>    |
| chr3R    | dme-mir-1000    | 1      | 1299   | 21          | 27          | 32689  | 25776  | 875    | 706    | 4      | 0     | <b>61398</b>   |
| chr3R    | dme-mir-1001    | 0      | 0      | 0           | 0           | 284    | 208    | 106    | 99     | 7      | 0     | <b>704</b>     |
| chr2L    | dme-mir-1002    | 0      | 0      | 0           | 0           | 0      | 0      | 0      | 0      | 0      | 0     | <b>0</b>       |
| chr3R    | dme-mir-1003    | 1487   | 1352   | 54          | 30          | 187    | 228    | 124    | 117    | 221    | 31    | <b>3830</b>    |
| chr2L    | dme-mir-1004    | 0      | 0      | 0           | 1           | 275    | 253    | 44     | 45     | 504    | 0     | <b>1121</b>    |
| chr2L    | dme-mir-1004-as | 0      | 0      | 0           | 0           | 2      | 0      | 0      | 0      | 0      | 0     | <b>2</b>       |
| chr2L    | dme-mir-1005    | 1      | 0      | 26          | 11          | 177    | 332    | 122    | 151    | 11     | 27    | <b>857</b>     |
| chr2L    | dme-mir-1006    | 58     | 145    | 114         | 107         | 552    | 519    | 415    | 346    | 53     | 8     | <b>2316</b>    |
| chrX     | dme-mir-1007    | 13     | 7      | 0           | 4           | 191    | 125    | 47     | 65     | 21     | 19    | <b>493</b>     |
| chr2R    | dme-mir-1008    | 94     | 262    | 13          | 9           | 208    | 104    | 106    | 123    | 39     | 2     | <b>960</b>     |
| chr2R    | dme-mir-1009    | 4      | 9      | 8           | 2           | 53     | 85     | 38     | 10     | 18     | 174   | <b>400</b>     |
| chr3R    | dme-mir-1010    | 1      | 106    | 2           | 0           | 1490   | 1677   | 319    | 315    | 588    | 15    | <b>4514</b>    |
| chr3R    | dme-mir-1011    | 0      | 0      | 0           | 0           | 14     | 19     | 1      | 0      | 11     | 0     | <b>45</b>      |
| chr3R    | dme-mir-1012    | 164    | 63     | 368         | 346         | 655    | 623    | 215    | 271    | 161    | 77    | <b>2943</b>    |
| chr3R    | dme-mir-1013    | 1      | 6      | 5           | 4           | 158    | 131    | 52     | 82     | 189    | 2     | <b>630</b>     |
| chr3R    | dme-mir-1014    | 0      | 0      | 0           | 0           | 0      | 0      | 248    | 226    | 0      | 0     | <b>474</b>     |
| chr3R    | dme-mir-1015    | 0      | 0      | 0           | 0           | 0      | 1      | 62     | 51     | 7      | 0     | <b>121</b>     |
| chr2R    | dme-mir-1016    | 5      | 6      | 5           | 4           | 61     | 76     | 18     | 27     | 21     | 0     | <b>224</b>     |
| chr3R    | dme-mir-1017    | 0      | 0      | 0           | 0           | 320    | 278    | 25     | 21     | 4      | 0     | <b>648</b>     |
| chr3R    | dme-mir-11      | 15690  | 13979  | 8011        | 12439       | 10872  | 21450  | 14438  | 19221  | 32372  | 6453  | <b>154924</b>  |
| chrX     | dme-mir-12      | 415    | 10569  | 26226       | 43021       | 1956   | 2682   | 21306  | 9603   | 217798 | 4407  | <b>337984</b>  |
| chr2L    | dme-mir-124     | 8      | 94     | 16          | 16          | 52268  | 48896  | 2863   | 1611   | 529    | 2     | <b>106303</b>  |
| chr2L    | dme-mir-125     | 10     | 4      | 37          | 63          | 12564  | 20670  | 5238   | 5890   | 11659  | 485   | <b>56620</b>   |
| chr2L    | dme-mir-133     | 5      | 4      | 10          | 4           | 8468   | 16473  | 1065   | 1029   | 133    | 2     | <b>27193</b>   |
| chr2R    | dme-mir-137     | 0      | 3      | 0           | 1           | 1228   | 1301   | 341    | 274    | 133    | 0     | <b>3281</b>    |
| chr3R    | dme-mir-13a     | 25     | 85     | 18          | 17          | 9820   | 9074   | 797    | 693    | 102    | 10    | <b>20640</b>   |
| chr3R    | dme-mir-13b     | 11557  | 14716  | 8331        | 12399       | 48948  | 34823  | 21017  | 24449  | 18242  | 10586 | <b>205067</b>  |
| chr3R    | dme-mir-13b-1   | 0      | 0      | 11          | 9           | 25     | 22     | 4      | 3      | 0      | 0     | <b>74</b>      |
| chrX     | dme-mir-13b-2   | 299    | 450    | 99          | 70          | 47     | 101    | 92     | 189    | 4      | 172   | <b>1522</b>    |
| chr2R    | dme-mir-14      | 182756 | 195051 | 4163        | 2658        | 54709  | 68581  | 26146  | 18871  | 23527  | 3037  | <b>579498</b>  |
| chr2R    | dme-mir-184     | 54062  | 109778 | 1296        | 1085        | 90077  | 89330  | 15336  | 27014  | 1890   | 30821 | <b>420688</b>  |
| chr3L    | dme-mir-190     | 171    | 462    | 208         | 168         | 2189   | 634    | 162    | 579    | 46     | 35    | <b>4653</b>    |
| chr3L    | dme-mir-193     | 3      | 96     | 0           | 4           | 3464   | 4491   | 12     | 3      | 25     | 2     | <b>8099</b>    |
| chrX     | dme-mir-210     | 1      | 1      | 50          | 29          | 54115  | 106957 | 409    | 415    | 35     | 0     | <b>162012</b>  |
| chr3L    | dme-mir-219     | 0      | 0      | 2           | 0           | 454    | 437    | 84     | 72     | 4      | 0     | <b>1052</b>    |
| chr2RHet | dme-mir-2279    | 8      | 13     | 3           | 5           | 12     | 16     | 12     | 10     | 11     | 0     | <b>91</b>      |
| chr2RHet | dme-mir-2279-as | 0      | 1      | 0           | 1           | 0      | 0      | 0      | 0      | 0      | 0     | <b>2</b>       |
| chr2L    | dme-mir-2280    | 0      | 0      | 0           | 0           | 0      | 0      | 1      | 0      | 0      | 0     | <b>1</b>       |
| chr3R    | dme-mir-2281    | 0      | 0      | 0           | 0           | 0      | 1      | 4      | 3      | 0      | 0     | <b>8</b>       |
| chr3L    | dme-mir-2282    | 1      | 4      | 0           | 0           | 0      | 0      | 0      | 0      | 0      | 0     | <b>5</b>       |
| chr3R    | dme-mir-2283    | 0      | 0      | 0           | 0           | 5      | 3      | 4      | 0      | 4      | 0     | <b>16</b>      |
| chr3R    | dme-mir-252     | 13294  | 205    | 1330        | 644         | 25243  | 37717  | 4036   | 4869   | 3465   | 41    | <b>90843</b>   |
| chr2L    | dme-mir-263a    | 66     | 4      | 43838       | 39275       | 30321  | 25950  | 11829  | 13344  | 858    | 7035  | <b>172520</b>  |
| chr3L    | dme-mir-263b    | 1      | 3      | 3           | 6           | 5500   | 6005   | 1144   | 902    | 46     | 0     | <b>13610</b>   |
| chr3L    | dme-mir-274     | 1      | 0      | 19          | 16          | 24301  | 55708  | 3593   | 4042   | 27748  | 10    | <b>115438</b>  |
| chr2L    | dme-mir-275     | 461    | 1247   | 21773       | 2588        | 1170   | 2503   | 1122   | 2616   | 2118   | 12586 | <b>48183</b>   |
| chr2L    | dme-mir-275-as  | 0      | 0      | 0           | 1           | 2      | 1      | 0      | 0      | 0      | 0     | <b>4</b>       |
| chr3L    | dme-mir-276     | 4524   | 15417  | 3114        | 5840        | 119752 | 58112  | 47955  | 128270 | 431    | 2525  | <b>385939</b>  |
| chr3L    | dme-mir-276a    | 9143   | 10875  | 1853        | 3728        | 129076 | 163232 | 90583  | 109217 | 7868   | 2710  | <b>528285</b>  |
| chr3L    | dme-mir-276b    | 5      | 187    | 2           | 8           | 12825  | 16746  | 530    | 384    | 11     | 0     | <b>30697</b>   |
| chr3R    | dme-mir-277     | 3703   | 2530   | 1291        | 1660        | 103586 | 104947 | 76053  | 68534  | 33397  | 168   | <b>395869</b>  |
| chr2R    | dme-mir-278     | 47     | 1647   | 1275        | 526         | 4954   | 9122   | 4966   | 6994   | 8491   | 226   | <b>38248</b>   |

|       |                |       |       |        |        |        |        |        |        |        |       |                |
|-------|----------------|-------|-------|--------|--------|--------|--------|--------|--------|--------|-------|----------------|
| chr3R | dme-mir-279    | 16526 | 15128 | 514    | 1492   | 14613  | 13021  | 14571  | 14205  | 5439   | 1208  | <b>96716</b>   |
| chr2R | dme-mir-281-1  | 179   | 198   | 88     | 118    | 455    | 557    | 17602  | 18346  | 501    | 1009  | <b>39053</b>   |
| chr2R | dme-mir-281-2  | 34    | 34    | 85     | 84     | 485    | 439    | 5100   | 5931   | 74     | 340   | <b>12606</b>   |
| chr3L | dme-mir-282    | 13543 | 4622  | 6635   | 31936  | 11981  | 6760   | 23325  | 43042  | 38752  | 6625  | <b>187220</b>  |
| chrX  | dme-mir-283    | 48    | 1394  | 7493   | 7791   | 648    | 448    | 577    | 1245   | 1257   | 257   | <b>21157</b>   |
| chr3R | dme-mir-284    | 0     | 7     | 3      | 1      | 907    | 2009   | 523    | 398    | 56     | 44    | <b>3949</b>    |
| chr3L | dme-mir-285    | 0     | 0     | 19     | 38     | 71480  | 63213  | 76     | 14     | 0      | 0     | <b>134840</b>  |
| chr2R | dme-mir-286    | 43    | 21    | 37     | 31     | 7      | 15     | 5      | 3      | 0      | 0     | <b>162</b>     |
| chr2L | dme-mir-287    | 0     | 0     | 0      | 0      | 0      | 0      | 0      | 3      | 0      | 0     | <b>3</b>       |
| chr3L | dme-mir-289    | 0     | 0     | 0      | 0      | 0      | 0      | 0      | 3      | 0      | 0     | <b>3</b>       |
| chr2L | dme-mir-2a     | 7839  | 29779 | 12762  | 9677   | 71729  | 62518  | 42678  | 74931  | 49756  | 37175 | <b>398844</b>  |
| chr2L | dme-mir-2a-1   | 173   | 388   | 26     | 27     | 60     | 64     | 21     | 75     | 46     | 118   | <b>997</b>     |
| chr2L | dme-mir-2a-2   | 2015  | 9699  | 179    | 164    | 3117   | 4486   | 1047   | 1245   | 392    | 655   | <b>22999</b>   |
| chr2L | dme-mir-2b     | 9981  | 20837 | 10205  | 7854   | 75902  | 58488  | 18220  | 30809  | 21203  | 15884 | <b>269383</b>  |
| chr2L | dme-mir-2b-1   | 498   | 207   | 738    | 465    | 2949   | 1927   | 623    | 1125   | 7      | 363   | <b>8901</b>    |
| chr2L | dme-mir-2b-2   | 431   | 1648  | 302    | 177    | 1250   | 1184   | 615    | 1094   | 140    | 862   | <b>7704</b>    |
| chr3R | dme-mir-2c     | 9     | 19    | 5      | 0      | 285    | 287    | 27     | 34     | 67     | 2     | <b>735</b>     |
| chr2R | dme-mir-3      | 15    | 12    | 2      | 1      | 5      | 5      | 2      | 3      | 28     | 6     | <b>79</b>      |
| chrX  | dme-mir-303    | 7     | 12    | 0      | 0      | 2      | 3      | 142    | 3      | 396    | 128   | <b>692</b>     |
| chrX  | dme-mir-304    | 34    | 1260  | 24022  | 30430  | 2252   | 2492   | 17186  | 7227   | 1946   | 1436  | <b>88286</b>   |
| chr2L | dme-mir-305    | 3321  | 10310 | 11464  | 9763   | 19850  | 20428  | 13965  | 12658  | 65041  | 5208  | <b>172008</b>  |
| chr2L | dme-mir-305-as | 0     | 4     | 3      | 7      | 21     | 8      | 0      | 3      | 0      | 2     | <b>49</b>      |
| chr2L | dme-mir-306    | 2500  | 6128  | 1707   | 1144   | 1317   | 2067   | 1152   | 1711   | 3329   | 1954  | <b>23008</b>   |
| chr2R | dme-mir-307    | 932   | 33    | 2      | 0      | 9783   | 15933  | 2063   | 1653   | 147    | 474   | <b>31019</b>   |
| chr2R | dme-mir-307-as | 1     | 0     | 8      | 17     | 0      | 3      | 6      | 3      | 0      | 0     | <b>38</b>      |
| chr2R | dme-mir-308    | 1483  | 2525  | 4450   | 5046   | 1835   | 1674   | 1864   | 2345   | 105    | 624   | <b>21951</b>   |
| chr2R | dme-mir-309    | 4     | 4     | 2      | 0      | 0      | 1      | 0      | 0      | 0      | 0     | <b>11</b>      |
| chr2R | dme-mir-310    | 8     | 6     | 2      | 0      | 4      | 2      | 55     | 31     | 11746  | 228   | <b>12081</b>   |
| chr2R | dme-mir-311    | 8     | 3     | 0      | 0      | 2      | 2      | 68     | 45     | 12537  | 460   | <b>13124</b>   |
| chr2R | dme-mir-312    | 3     | 9     | 0      | 0      | 14     | 9      | 95     | 137    | 5964   | 2803  | <b>9034</b>    |
| chr2R | dme-mir-313    | 2     | 3     | 0      | 0      | 7      | 4      | 59     | 27     | 1295   | 1216  | <b>2613</b>    |
| chr3L | dme-mir-314    | 0     | 3     | 3      | 3      | 32     | 72     | 11627  | 15254  | 102    | 31    | <b>27126</b>   |
| chr3L | dme-mir-315    | 0     | 0     | 0      | 0      | 2108   | 2424   | 24     | 24     | 42     | 0     | <b>4622</b>    |
| chr3L | dme-mir-316    | 0     | 0     | 13     | 14     | 1959   | 3236   | 5546   | 5873   | 15460  | 644   | <b>32745</b>   |
| chr3R | dme-mir-317    | 9157  | 21083 | 1149   | 1536   | 15714  | 14533  | 2370   | 1923   | 15712  | 1023  | <b>84200</b>   |
| chr3R | dme-mir-318    | 13    | 90    | 0      | 1      | 2      | 6      | 4      | 261    | 70     | 34886 | <b>35333</b>   |
| chr2R | dme-mir-31a    | 5     | 18    | 834    | 763    | 20323  | 22138  | 24842  | 37845  | 3969   | 1703  | <b>112439</b>  |
| chrX  | dme-mir-31b    | 3     | 4     | 0      | 0      | 12     | 44     | 2068   | 1533   | 3063   | 329   | <b>7055</b>    |
| chr3L | dme-mir-33     | 1927  | 4040  | 1982   | 2256   | 3264   | 3555   | 9633   | 6768   | 581    | 4025  | <b>38031</b>   |
| chr3R | dme-mir-34     | 13980 | 22763 | 2629   | 2983   | 79455  | 77345  | 9383   | 11126  | 40124  | 6344  | <b>266132</b>  |
| chr2L | dme-mir-375    | 1     | 0     | 29992  | 34030  | 100    | 182    | 4698   | 2781   | 5219   | 0     | <b>77002</b>   |
| chr2R | dme-mir-4      | 6     | 3     | 2      | 6      | 5      | 5      | 2      | 0      | 0      | 0     | <b>29</b>      |
| chr2R | dme-mir-5      | 14    | 13    | 29     | 26     | 12     | 22     | 14     | 14     | 0      | 8     | <b>152</b>     |
| chr2R | dme-mir-6      | 10    | 4     | 0      | 0      | 0      | 0      | 0      | 0      | 0      | 0     | <b>14</b>      |
| chr2R | dme-mir-7      | 332   | 364   | 282    | 270    | 24251  | 20729  | 3010   | 3182   | 3021   | 2356  | <b>57796</b>   |
| chr2L | dme-mir-79     | 2043  | 5420  | 2566   | 3518   | 13483  | 13318  | 12143  | 7529   | 767    | 6723  | <b>67511</b>   |
| chr2R | dme-mir-8      | 4003  | 27812 | 135955 | 180692 | 323642 | 244757 | 447346 | 655203 | 198170 | 44755 | <b>2262335</b> |
| chr2L | dme-mir-87     | 0     | 3     | 3      | 4      | 4105   | 4107   | 908    | 1834   | 42     | 110   | <b>11116</b>   |
| chrX  | dme-mir-927    | 0     | 1     | 0      | 0      | 1159   | 994    | 41     | 31     | 0      | 0     | <b>2227</b>    |
| chr3R | dme-mir-929    | 1     | 3     | 32     | 39     | 21034  | 13343  | 1810   | 2808   | 14     | 23    | <b>39107</b>   |
| chr3R | dme-mir-92a    | 13    | 2215  | 3      | 7      | 2488   | 2484   | 254    | 579    | 4984   | 1514  | <b>14541</b>   |
| chr3R | dme-mir-92b    | 20    | 670   | 50     | 64     | 95     | 68     | 42     | 233    | 2615   | 990   | <b>4845</b>    |
| chr2L | dme-mir-932    | 5     | 177   | 6      | 2      | 6328   | 8766   | 276    | 240    | 158    | 4     | <b>15962</b>   |
| chr4  | dme-mir-954    | 11    | 91    | 2      | 1      | 103    | 124    | 50     | 38     | 217    | 43    | <b>680</b>     |
| chr3L | dme-mir-955    | 0     | 0     | 0      | 0      | 95     | 84     | 59     | 89     | 25     | 2     | <b>353</b>     |
| chr3L | dme-mir-956    | 0     | 1     | 0      | 1      | 7      | 20     | 4342   | 4776   | 189    | 17    | <b>9354</b>    |
| chr3L | dme-mir-957    | 0     | 0     | 3      | 7      | 10776  | 12255  | 839    | 1053   | 0      | 0     | <b>24933</b>   |
| chr3L | dme-mir-958    | 1     | 28    | 0      | 1      | 5      | 29     | 7379   | 7210   | 32     | 0     | <b>14686</b>   |
| chr2L | dme-mir-959    | 0     | 0     | 0      | 0      | 12     | 18     | 478    | 10     | 60382  | 8     | <b>60908</b>   |
| chr2L | dme-mir-960    | 0     | 1     | 0      | 2      | 53     | 103    | 1717   | 117    | 19026  | 21    | <b>21040</b>   |
| chr2L | dme-mir-961    | 0     | 0     | 0      | 0      | 9      | 20     | 177    | 17     | 1670   | 10    | <b>1902</b>    |
| chr2L | dme-mir-962    | 0     | 0     | 2      | 0      | 49     | 55     | 401    | 134    | 1649   | 64    | <b>2353</b>    |

|                               |                 |               |               |               |               |                |                |                |                |                |               |               |
|-------------------------------|-----------------|---------------|---------------|---------------|---------------|----------------|----------------|----------------|----------------|----------------|---------------|---------------|
| chr2L                         | dme-mir-963     | 0             | 1             | 0             | 0             | 9              | 20             | 368            | 21             | 3241           | 2             | <b>3662</b>   |
| chr2L                         | dme-mir-964     | 0             | 0             | 0             | 0             | 12             | 41             | 437            | 34             | 35403          | 10            | <b>35937</b>  |
| chr2L                         | dme-mir-965     | 559           | 911           | 210           | 567           | 632            | 613            | 1129           | 689            | 32             | 280           | <b>5622</b>   |
| chr2L                         | dme-mir-966     | 15            | 58            | 2             | 4             | 14             | 12             | 5              | 21             | 21             | 41            | <b>192</b>    |
| chr2L                         | dme-mir-967     | 10            | 10            | 0             | 1             | 7              | 2              | 3              | 0              | 0              | 0             | <b>33</b>     |
| chr2L                         | dme-mir-968     | 0             | 0             | 0             | 0             | 4              | 3              | 0              | 0              | 0              | 0             | <b>7</b>      |
| chrX                          | dme-mir-969     | 0             | 0             | 0             | 2             | 340            | 192            | 27             | 21             | 0              | 0             | <b>581</b>    |
| chrX                          | dme-mir-970     | 1140          | 1776          | 283           | 198           | 2525           | 3119           | 656            | 703            | 350            | 114           | <b>10864</b>  |
| chrX                          | dme-mir-971     | 0             | 52            | 0             | 1             | 70             | 70             | 4              | 0              | 116            | 0             | <b>313</b>    |
| chrX                          | dme-mir-972     | 0             | 0             | 0             | 0             | 0              | 1              | 61             | 0              | 3364           | 0             | <b>3426</b>   |
| chrX                          | dme-mir-973     | 0             | 12            | 0             | 0             | 0              | 0              | 76             | 3              | 179            | 0             | <b>270</b>    |
| chrX                          | dme-mir-974     | 0             | 3             | 0             | 0             | 9              | 2              | 236            | 3              | 287            | 0             | <b>540</b>    |
| chrX                          | dme-mir-975     | 0             | 4             | 0             | 0             | 0              | 0              | 33             | 0              | 7469           | 0             | <b>7507</b>   |
| chrX                          | dme-mir-976     | 0             | 1             | 0             | 0             | 0              | 2              | 380            | 7              | 26338          | 0             | <b>26728</b>  |
| chrX                          | dme-mir-977     | 1             | 66            | 0             | 0             | 5              | 4              | 680            | 0              | 28350          | 0             | <b>29106</b>  |
| chrX                          | dme-mir-978     | 1             | 6             | 0             | 0             | 4              | 3              | 241            | 3              | 29600          | 0             | <b>29857</b>  |
| chrX                          | dme-mir-979     | 0             | 0             | 0             | 0             | 0              | 0              | 21             | 0              | 1740           | 0             | <b>1761</b>   |
| chrX                          | dme-mir-980     | 1534          | 453           | 5             | 3             | 611            | 1464           | 2995           | 3113           | 539            | 106           | <b>10823</b>  |
| chrX                          | dme-mir-981     | 1             | 1427          | 0             | 3             | 404            | 968            | 56             | 65             | 56             | 0             | <b>2980</b>   |
| chrX                          | dme-mir-982     | 0             | 16            | 0             | 0             | 2              | 3              | 118            | 10             | 420            | 89            | <b>658</b>    |
| chrX                          | dme-mir-983     | 6             | 13            | 0             | 0             | 16             | 16             | 724            | 24             | 23562          | 798           | <b>25160</b>  |
| chrX                          | dme-mir-983-1   | 0             | 0             | 0             | 0             | 0              | 0              | 1              | 0              | 4              | 4             | <b>8</b>      |
| chrX                          | dme-mir-984     | 25            | 102           | 0             | 0             | 18             | 11             | 551            | 24             | 7704           | 1378          | <b>9812</b>   |
| chrX                          | dme-mir-985     | 0             | 0             | 0             | 0             | 2              | 0              | 214            | 7              | 1124           | 2             | <b>1348</b>   |
| chr2R                         | dme-mir-986     | 3             | 43            | 338           | 226           | 475            | 1006           | 1880           | 1749           | 1082           | 582           | <b>7383</b>   |
| chr2R                         | dme-mir-987     | 0             | 4             | 14            | 36            | 25758          | 16043          | 803            | 1056           | 11             | 0             | <b>43726</b>  |
| chr2R                         | dme-mir-988     | 13800         | 22601         | 893           | 539           | 1086           | 1460           | 876            | 960            | 23055          | 414           | <b>65683</b>  |
| chr2R                         | dme-mir-989     | 3             | 237           | 22            | 30            | 2              | 6              | 44             | 45010          | 21             | 88414         | <b>133789</b> |
| chr2R                         | dme-mir-990     | 0             | 0             | 0             | 0             | 669            | 430            | 8              | 7              | 0              | 0             | <b>1114</b>   |
| chr2R                         | dme-mir-991     | 0             | 0             | 0             | 0             | 0              | 1              | 120            | 7              | 445            | 8             | <b>580</b>    |
| chr2R                         | dme-mir-992     | 2             | 6             | 0             | 0             | 0              | 1              | 45             | 3              | 1383           | 0             | <b>1440</b>   |
| chr3R                         | dme-mir-993     | 0             | 1             | 0             | 2             | 1720           | 1433           | 1448           | 1077           | 4              | 0             | <b>5684</b>   |
| chr3R                         | dme-mir-994     | 5             | 40            | 0             | 2             | 4              | 3              | 4              | 261            | 67             | 14463         | <b>14848</b>  |
| chr3R                         | dme-mir-995     | 3761          | 5626          | 2610          | 3220          | 3949           | 3287           | 909            | 1574           | 798            | 3679          | <b>29411</b>  |
| chr3R                         | dme-mir-996     | 23117         | 15398         | 4771          | 6077          | 18293          | 27396          | 29997          | 27603          | 1218           | 28482         | <b>182353</b> |
| chr3R                         | dme-mir-997     | 0             | 0             | 0             | 0             | 0              | 0              | 184            | 0              | 207            | 0             | <b>391</b>    |
| chr3R                         | dme-mir-998     | 3118          | 5942          | 3397          | 5021          | 8319           | 5610           | 1074           | 1574           | 294            | 779           | <b>35128</b>  |
| chr3R                         | dme-mir-999     | 247           | 560           | 43            | 35            | 12595          | 10562          | 1464           | 2643           | 2356           | 141           | <b>30647</b>  |
| chr3L                         | dme-mir-9a      | 49            | 124           | 2464          | 2193          | 21120          | 32808          | 28787          | 30216          | 23961          | 77            | <b>141799</b> |
| chr2L                         | dme-mir-9b      | 2463          | 11885         | 2011          | 1648          | 2726           | 3726           | 4263           | 5513           | 23545          | 10570         | <b>68350</b>  |
| chr2L                         | dme-mir-9c      | 1896          | 5648          | 1179          | 920           | 4579           | 5475           | 5508           | 8331           | 7175           | 4518          | <b>45229</b>  |
| chr3R                         | dme-mir-iab-4   | 0             | 1             | 0             | 0             | 4              | 2              | 94             | 120            | 25             | 2             | <b>247</b>    |
| chr3R                         | dme-mir-iab-4as | 0             | 0             | 0             | 0             | 0              | 1              | 144            | 96             | 56             | 0             | <b>297</b>    |
| <b>SUM_Norm_Reads_in_libr</b> |                 | <b>476512</b> | <b>670269</b> | <b>419331</b> | <b>506593</b> | <b>2221284</b> | <b>2140318</b> | <b>1943944</b> | <b>2554945</b> | <b>1290996</b> | <b>481225</b> |               |
