# Supplementary material
Source: PubMed Central journal article supplement (PMC4196619)
Supplement: supp_114.169268_TableS11.pdf [file supp_114.169268_TableS11.pdf]

**TABLE S11:** Abundance of miRNAs in *msl3* mutant salivary glands

|         | Genotype    | Exp. | Average Ct <sup>a</sup> | Corrected amount <sup>b</sup> | Fold Difference (FD) <sup>c</sup> | log <sub>2</sub> (FD) | Average log <sub>2</sub> (FD) | SD <sup>d</sup> | p value <sup>e</sup> |
|---------|-------------|------|-------------------------|-------------------------------|-----------------------------------|-----------------------|-------------------------------|-----------------|----------------------|
| Dspt4   | msl3-/msl3+ | 1    | 23.5091                 | 95.762                        | 1.000                             | 0.000                 | 0.000                         | 0.000           |                      |
|         |             | 2    | 23.7935                 | 200.048                       | 1.000                             | 0.000                 |                               |                 |                      |
|         | msl3-/msl3- | 1    | 23.2659                 | 106.222                       |                                   |                       |                               |                 |                      |
|         |             | 2    | 23.2766                 | 250.610                       |                                   |                       |                               |                 |                      |
| mir-283 | msl3-/msl3+ | 1    | 24.9728                 | 89.769                        | 0.514                             | -0.961                | -0.901                        | 0.086           | 0.00045              |
|         |             | 2    | 24.7449                 | 185.152                       | 0.559                             | -0.840                |                               |                 |                      |
|         | msl3-/msl3- | 1    | 26.4340                 | 57.172                        |                                   |                       |                               |                 |                      |
|         |             | 2    | 26.1674                 | 129.580                       |                                   |                       |                               |                 |                      |
| mir-304 | msl3-/msl3+ | 1    | 29.9743                 | 100.663                       | 0.338                             | -1.564                | -1.631                        | 0.095           | 0.00070              |
|         |             | 2    | 30.2644                 | 203.835                       | 0.308                             | -1.698                |                               |                 |                      |
|         | msl3-/msl3- | 1    | 32.2164                 | 37.754                        |                                   |                       |                               |                 |                      |
|         |             | 2    | 32.3252                 | 78.686                        |                                   |                       |                               |                 |                      |
| mir-12  | msl3-/msl3+ | 1    | 21.5294                 | 88.515                        | 0.406                             | -1.300                | -1.284                        | 0.022           | 0.00006              |
|         |             | 2    | 21.8149                 | 182.599                       | 0.415                             | -1.269                |                               |                 |                      |
|         | msl3-/msl3- | 1    | 23.8153                 | 39.885                        |                                   |                       |                               |                 |                      |
|         |             | 2    | 24.1442                 | 94.941                        |                                   |                       |                               |                 |                      |
| mir-979 | msl3-/msl3+ | 1    | 36.2751                 | 149.915                       | 0.833                             | -0.263                | -0.749                        | 0.687           | 0.24047              |
|         |             | 2    | 35.4645                 | 209.309                       | 0.425                             | -1.235                |                               |                 |                      |
|         | msl3-/msl3- | 1    | 36.5484                 | 138.570                       |                                   |                       |                               |                 |                      |
|         |             | 2    | 37.5508                 | 111.399                       |                                   |                       |                               |                 |                      |
| mir-210 | msl3-/msl3+ | 1    | 28.5830                 | 100.340                       | 1.425                             | 0.511                 | 0.384                         | 0.180           | 0.07654              |
|         |             | 2    | 29.1231                 | 202.647                       | 1.195                             | 0.257                 |                               |                 |                      |
|         | msl3-/msl3- | 1    | 27.8037                 | 158.625                       |                                   |                       |                               |                 |                      |
|         |             | 2    | 28.3154                 | 303.278                       |                                   |                       |                               |                 |                      |
| U6      | msl3-/msl3+ | 1    | 17.1883                 | 100.088                       | 0.611                             | -0.710                | -0.627                        | 0.117           | 0.01472              |
|         |             | 2    | 17.7507                 | 184.333                       | 0.686                             | -0.544                |                               |                 |                      |
|         | msl3-/msl3- | 1    | 18.0034                 | 67.880                        |                                   |                       |                               |                 |                      |
|         |             | 2    | 18.2684                 | 158.374                       |                                   |                       |                               |                 |                      |

a. Dilution series were prepared in the control sample to construct standard curves for the Dspt4 autosomal gene reference and for each miRNA. C<sub>T</sub> values measured in replicates for the target miRNA and Dspt4 reference in mutant and heterozygous mutant control samples respectively are averaged in individual experiments (Exp.1 and 2) and the corrected amount of target miRNA and Dspt4 reference inferred from the standard curve in b.

c. The amounts of miRNA are normalized in the mutant sample and in the heterozygous mutant control sample by dividing the calculated amount of miRNA by the amount of the Dspt4 reference. The fold difference (FD) or relative expression level of a miRNA corresponds to the

ratio of the normalized abundance of the miRNA in the mutant relative to the heterozygous mutant control sample, that is the ratio  $[\text{miRNA/Dspt4}] \text{ Mutant} / [\text{miRNA/Dspt4}] \text{ Control}$ ; the average of the base 2 logarithm of the fold difference is plotted in Figure 2B,C.

d. SD is the standard deviation of the difference.

e. p-values are established in a two tailed Students t-test comparing the means of the normalized amounts of target miRNA in the mutant and in the heterozygous mutant control samples.

\* $p < 0.05$ , \*\* $p < 0.005$ . \*\*\* $p < 0.0005$
