# Supplementary material
Source: PubMed Central journal article supplement (PMC4196619)
Supplement: supp_114.169268_TableS12.pdf [file supp_114.169268_TableS12.pdf]

**TABLE S12:** Abundance of miRNAs in *msl3* mutant L3 larvae

|         | Genotype    | Exp. | Average Ct <sup>a</sup> | Corrected amount <sup>b</sup> | Fold Difference (FD) <sup>c</sup> | log <sub>2</sub> (FD) | Average log <sub>2</sub> (FD) | SD <sup>d</sup> | p value <sup>e</sup> |
|---------|-------------|------|-------------------------|-------------------------------|-----------------------------------|-----------------------|-------------------------------|-----------------|----------------------|
| Dspt4   | msl3-/msl3+ | 1    | 25.9974                 | 34.628                        | 1.000                             | 0.000                 |                               |                 |                      |
|         |             | 2    | 25.6265                 | 92.801                        | 1.000                             | 0.000                 |                               |                 |                      |
|         | msl3-/msl3- | 1    | 24.8854                 | 54.398                        |                                   |                       |                               |                 |                      |
|         |             | 2    | 24.7720                 | 132.066                       |                                   |                       |                               |                 |                      |
| mir-283 | msl3-/msl3+ | 1    | 26.9201                 | 49.324                        | 0.756                             | -0.403                | -0.253                        | 0.213           | 0.18885              |
|         |             | 2    | 27.2713                 | 98.504                        | 0.932                             | -0.102                |                               |                 |                      |
|         | msl3-/msl3- | 1    | 26.3534                 | 58.590                        |                                   |                       |                               |                 |                      |
|         |             | 2    | 26.1358                 | 130.596                       |                                   |                       |                               |                 |                      |
| mir-304 | msl3-/msl3+ | 1    | 31.2445                 | 57.627                        | 0.356                             | -1.488                | -1.475                        | 0.019           | 0.03552              |
|         |             | 2    | 31.5988                 | 109.348                       | 0.363                             | -1.462                |                               |                 |                      |
|         | msl3-/msl3- | 1    | 32.5782                 | 32.271                        |                                   |                       |                               |                 |                      |
|         |             | 2    | 33.0699                 | 56.492                        |                                   |                       |                               |                 |                      |
| mir-12  | msl3-/msl3+ | 1    | 22.7659                 | 57.656                        | 0.455                             | -1.136                | -1.040                        | 0.136           | 0.00881              |
|         |             | 2    | 22.9153                 | 134.505                       | 0.520                             | -0.943                |                               |                 |                      |
|         | msl3-/msl3- | 1    | 23.7208                 | 41.214                        |                                   |                       |                               |                 |                      |
|         |             | 2    | 23.9739                 | 99.544                        |                                   |                       |                               |                 |                      |
| mir-979 | msl3-/msl3+ | 1    | 31.1498                 | 1044.716                      | 0.760                             | -0.396                | -0.259                        | 0.193           | 0.38647              |
|         |             | 2    | 31.4659                 | 927.357                       | 0.918                             | -0.123                |                               |                 |                      |
|         | msl3-/msl3- | 1    | 30.6831                 | 1247.539                      |                                   |                       |                               |                 |                      |
|         |             | 2    | 30.7420                 | 1211.981                      |                                   |                       |                               |                 |                      |
| mir-210 | msl3-/msl3+ | 1    | 27.5383                 | 185.744                       | 1.197                             | 0.259                 | 0.065                         | 0.275           | 0.38641              |
|         |             | 2    | 27.5514                 | 461.878                       | 0.914                             | -0.129                |                               |                 |                      |
|         | msl3-/msl3- | 1    | 26.4166                 | 349.245                       |                                   |                       |                               |                 |                      |
|         |             | 2    | 26.9873                 | 600.996                       |                                   |                       |                               |                 |                      |
| U6      | msl3-/msl3+ | 1    | 17.1512                 | 101.819                       | 0.694                             | -0.526                | -0.444                        | 0.117           | 0.14280              |
|         |             | 2    | 17.5728                 | 194.135                       | 0.778                             | -0.362                |                               |                 |                      |
|         | msl3-/msl3- | 1    | 16.9733                 | 111.054                       |                                   |                       |                               |                 |                      |
|         |             | 2    | 17.2156                 | 215.036                       |                                   |                       |                               |                 |                      |

a-e as in Table S11.
