# Supplementary material
Source: PubMed Central journal article supplement (PMC4196619)
Supplement: supp_114.169268_TableS13.pdf [file supp_114.169268_TableS13.pdf]

**TABLE S13:** Abundance of miRNAs in *msl3* mutant salivary glands

|          | Genotype    | Exp. | Average Ct <sup>a</sup> | Corrected amount <sup>b</sup> | Fold Difference (FD) <sup>c</sup> | log <sub>2</sub> (FD) | Average log <sub>2</sub> (FD) | SD <sup>d</sup> | p value <sup>e</sup> |
|----------|-------------|------|-------------------------|-------------------------------|-----------------------------------|-----------------------|-------------------------------|-----------------|----------------------|
| Dspt4    | msl3-/msl3+ | 1    | 24.216                  | 100.872                       | 1.000                             | 0.000                 | 0.000                         | 0.000           |                      |
|          |             | 2    | 24.262                  | 99.102                        | 1.000                             | 0.000                 |                               |                 |                      |
|          | msl3-/msl3- | 1    | 23.663                  | 124.744                       |                                   |                       |                               |                 |                      |
|          |             | 2    | 24.150                  | 103.457                       |                                   |                       |                               |                 |                      |
| mir-314  | msl3-/msl3+ | 1    | 31.225                  | 100.048                       | 2.258                             | 1.175                 | 1.149                         | 0.037           | 0.0667               |
|          |             | 2    | 30.498                  | 152.880                       | 2.178                             | 1.123                 |                               |                 |                      |
|          | msl3-/msl3- | 1    | 29.463                  | 279.422                       |                                   |                       |                               |                 |                      |
|          |             | 2    | 29.089                  | 347.564                       |                                   |                       |                               |                 |                      |
| mir-981  | msl3-/msl3+ | 1    | 32.920                  | 117.805                       | 0.958                             | -0.061                | 0.197                         | 0.366           | 0.2414               |
|          |             | 2    | 33.704                  | 84.927                        | 1.372                             | 0.456                 |                               |                 |                      |
|          | msl3-/msl3- | 1    | 32.513                  | 139.636                       |                                   |                       |                               |                 |                      |
|          |             | 2    | 32.844                  | 121.608                       |                                   |                       |                               |                 |                      |
| mir-13b  | msl3-/msl3+ | 1    | 23.450                  | 122.437                       | 0.411                             | -1.282                | -0.884                        | 0.564           | 0.0703               |
|          |             | 2    | 24.218                  | 81.676                        | 0.714                             | -0.485                |                               |                 |                      |
|          | msl3-/msl3- | 1    | 24.733                  | 62.257                        |                                   |                       |                               |                 |                      |
|          |             | 2    | 24.774                  | 60.919                        |                                   |                       |                               |                 |                      |
| mir-100  | msl3-/msl3+ | 1    | 29.324                  | 99.987                        | 1.185                             | 0.245                 | 0.545                         | 0.425           | 0.0596               |
|          |             | 2    | 29.977                  | 75.275                        | 1.796                             | 0.845                 |                               |                 |                      |
|          | msl3-/msl3- | 1    | 28.447                  | 146.492                       |                                   |                       |                               |                 |                      |
|          |             | 2    | 28.532                  | 141.148                       |                                   |                       |                               |                 |                      |
| mir-1013 | msl3-/msl3+ | 1    | 31.660                  | 84.010                        | 1.176                             | 0.234                 | -0.137                        | 0.524           | 0.3233               |
|          |             | 2    | 31.010                  | 119.016                       | 0.704                             | -0.507                |                               |                 |                      |
|          | msl3-/msl3- | 1    | 30.962                  | 122.159                       |                                   |                       |                               |                 |                      |
|          |             | 2    | 31.585                  | 87.439                        |                                   |                       |                               |                 |                      |
| U6       | msl3-/msl3+ | 1    | 18.097                  | 100.004                       | 0.726                             | -0.462                | -0.418                        | 0.061           | 0.0046               |
|          |             | 2    | 18.127                  | 98.736                        | 0.771                             | -0.375                |                               |                 |                      |
|          | msl3-/msl3- | 1    | 18.352                  | 89.811                        |                                   |                       |                               |                 |                      |
|          |             | 2    | 18.643                  | 79.476                        |                                   |                       |                               |                 |                      |

a-e as in Table S11.
