# Supplementary material
Source: PubMed Central journal article supplement (PMC4196619)
Supplement: supp_114.169268_TableS14.pdf [file supp_114.169268_TableS14.pdf]

**TABLE S14:** Abundance of miRNAs in *msl3* mutant L3 larvae

|          | Genotype    | Exp. | Average Ct <sup>a</sup> | Corrected amount <sup>b</sup> | Fold Difference (FD) <sup>c</sup> | log2 (FD) | Average log2(FD) | SD <sup>d</sup> | p value <sup>e</sup> |
|----------|-------------|------|-------------------------|-------------------------------|-----------------------------------|-----------|------------------|-----------------|----------------------|
| Dspt4    | msl3-/msl3+ | 1    | 26.1455                 | 48.078                        | 1.000                             | 0.000     |                  |                 |                      |
|          |             | 2    | 26.1633                 | 47.750                        | 1.000                             | 0.000     |                  |                 |                      |
|          | msl3-/msl3- | 1    | 24.995                  | 74.796                        |                                   |           |                  |                 |                      |
|          |             | 2    | 25.335                  | 65.635                        |                                   |           |                  |                 |                      |
| mir-314  | msl3-/msl3+ | 1    | 21.1699                 | 35123.558                     | 0.350                             | -1.514    | -1.441           | 0.104           | 0.0003               |
|          |             | 2    | 21.2272                 | 33969.861                     | 0.388                             | -1.367    |                  |                 |                      |
|          | msl3-/msl3- | 1    | 22.213                  | 19128.386                     |                                   |           |                  |                 |                      |
|          |             | 2    | 22.307                  | 18104.321                     |                                   |           |                  |                 |                      |
| mir-981  | msl3-/msl3+ | 1    | 29.5758                 | 476.005                       | 0.655                             | -0.609    | -0.290           | 0.452           | 0.1481               |
|          |             | 2    | 30.2449                 | 359.989                       | 1.021                             | 0.030     |                  |                 |                      |
|          | msl3-/msl3- | 1    | 29.529                  | 485.377                       |                                   |           |                  |                 |                      |
|          |             | 2    | 29.433                  | 505.205                       |                                   |           |                  |                 |                      |
| mir-13b  | msl3-/msl3+ | 1    | 21.4858                 | 344.693                       | 0.540                             | -0.889    | -0.905           | 0.022           | 0.0079               |
|          |             | 2    | 21.5918                 | 325.964                       | 0.528                             | -0.921    |                  |                 |                      |
|          | msl3-/msl3- | 1    | 21.817                  | 289.481                       |                                   |           |                  |                 |                      |
|          |             | 2    | 22.199                  | 236.640                       |                                   |           |                  |                 |                      |
| mir-100  | msl3-/msl3+ | 1    | 26.8667                 | 291.331                       | 0.208                             | -2.262    | -2.062           | 0.284           | 0.0032               |
|          |             | 2    | 27.1654                 | 255.822                       | 0.275                             | -1.861    |                  |                 |                      |
|          | msl3-/msl3- | 1    | 29.455                  | 94.471                        |                                   |           |                  |                 |                      |
|          |             | 2    | 29.398                  | 96.819                        |                                   |           |                  |                 |                      |
| mir-1013 | msl3-/msl3+ | 1    | 29.240                  | 142.324                       | 0.573                             | -0.803    | -0.610           | 0.273           | 0.0861               |
|          |             | 2    | 28.286                  | 126.568                       | 0.749                             | -0.417    |                  |                 |                      |
|          | msl3-/msl3- | 1    | 29.365                  | 126.899                       |                                   |           |                  |                 |                      |
|          |             | 2    | 29.391                  | 130.301                       |                                   |           |                  |                 |                      |
| U6       | msl3-/msl3+ | 1    | 17.259                  | 307.518                       | 0.601                             | -0.734    | -1.024           | 0.410           | 0.0125               |
|          |             | 2    | 17.538                  | 512.989                       | 0.402                             | -1.314    |                  |                 |                      |
|          | msl3-/msl3- | 1    | 17.532                  | 287.625                       |                                   |           |                  |                 |                      |
|          |             | 2    | 17.469                  | 283.612                       |                                   |           |                  |                 |                      |

a-e as in Table S11.
