# Supplementary material
Source: PubMed Central journal article supplement (PMC4196619)
Supplement: supp_114.169268_TableS15.pdf [file supp_114.169268_TableS15.pdf]

**TABLE S15:** Abundance of miRNAs in *mle* mutant salivary glands

|         | Genotype  | Exp. | Average Ct <sup>a</sup> | Corrected amount <sup>b</sup> | Fold Difference (FD) <sup>c</sup> | log <sub>2</sub> (FD) | Average log <sub>2</sub> (FD) | SD <sup>d</sup> | p value <sup>e</sup> |
|---------|-----------|------|-------------------------|-------------------------------|-----------------------------------|-----------------------|-------------------------------|-----------------|----------------------|
| Dspt4   | mle-/mle+ | 1    | 24.693                  | 102.093                       | 1.000                             | 0.000                 |                               |                 |                      |
|         |           | 2    | 24.533                  | 100.668                       | 1.000                             | 0.000                 |                               |                 |                      |
|         | mle-/mle- | 1    | 23.901                  | 170.434                       |                                   |                       |                               |                 |                      |
|         |           | 2    | 23.827                  | 158.044                       |                                   |                       |                               |                 |                      |
| mir-283 | mle-/mle+ | 1    | 25.142                  | 100.816                       | 0.740                             | -0.435                | -0.430                        | 0.008           | 0.0040               |
|         |           | 2    | 24.812                  | 102.914                       | 0.745                             | -0.425                |                               |                 |                      |
|         | mle-/mle- | 1    | 24.788                  | 124.474                       |                                   |                       |                               |                 |                      |
|         |           | 2    | 24.510                  | 120.380                       |                                   |                       |                               |                 |                      |
| mir-304 | mle-/mle+ | 1    | 30.746                  | 96.522                        | 0.636                             | -0.652                | -0.739                        | 0.123           | 0.0031               |
|         |           | 2    | 31.004                  | 99.139                        | 0.564                             | -0.826                |                               |                 |                      |
|         | mle-/mle- | 1    | 30.568                  | 102.559                       |                                   |                       |                               |                 |                      |
|         |           | 2    | 31.168                  | 87.778                        |                                   |                       |                               |                 |                      |
| mir-12  | mle-/mle+ | 1    | 21.652                  | 101.133                       | 0.532                             | -0.910                | -0.946                        | 0.051           | 0.0003               |
|         |           | 2    | 21.533                  | 100.745                       | 0.506                             | -0.983                |                               |                 |                      |
|         | mle-/mle- | 1    | 21.869                  | 89.833                        |                                   |                       |                               |                 |                      |
|         |           | 2    | 21.882                  | 80.045                        |                                   |                       |                               |                 |                      |
| mir-979 | mle-/mle+ | 1    | 36.290                  | 101.068                       | 0.730                             | -0.454                | -0.635                        | 0.257           | 0.0203               |
|         |           | 2    | 35.292                  | 102.616                       | 0.568                             | -0.817                |                               |                 |                      |
|         | mle-/mle- | 1    | 36.064                  | 123.209                       |                                   |                       |                               |                 |                      |
|         |           | 2    | 35.753                  | 91.460                        |                                   |                       |                               |                 |                      |
| mir-210 | mle-/mle+ | 1    | 29.642                  | 107.507                       | 0.782                             | -0.355                | -0.182                        | 0.244           | 0.2301               |
|         |           | 2    | 29.573                  | 109.561                       | 0.994                             | -0.009                |                               |                 |                      |
|         | mle-/mle- | 1    | 29.288                  | 140.360                       |                                   |                       |                               |                 |                      |
|         |           | 2    | 29.094                  | 170.943                       |                                   |                       |                               |                 |                      |
| U6      | mle-/mle+ | 1    | 18.185                  | 99.069                        | 0.883                             | -0.180                | 0.098                         | 0.393           | 0.3556               |
|         |           | 2    | 18.095                  | 99.106                        | 1.298                             | 0.376                 |                               |                 |                      |
|         | mle-/mle- | 1    | 17.555                  | 146.012                       |                                   |                       |                               |                 |                      |
|         |           | 2    | 17.022                  | 201.962                       |                                   |                       |                               |                 |                      |

a-e as in Table S11.
