# Supplementary material
Source: PubMed Central journal article supplement (PMC4196619)
Supplement: supp_114.169268_TableS16.pdf [file supp_114.169268_TableS16.pdf]

**TABLE S16:** Abundance of miRNAs in *mle* mutant L3 larvae

|         | Genotype  | Exp. | Average Ct <sup>a</sup> | Corrected amount <sup>b</sup> | Fold Difference (FD) <sup>c</sup> | log2 (FD) | Average log2(FD) | SD <sup>d</sup> | p value <sup>e</sup> |
|---------|-----------|------|-------------------------|-------------------------------|-----------------------------------|-----------|------------------|-----------------|----------------------|
| Dspt4   | mle-/mle+ | 1    | 25.034                  | 81.970                        | 1.000                             | 0.000     |                  |                 |                      |
|         |           | 2    | 24.991                  | 76.150                        | 1.000                             | 0.000     |                  |                 |                      |
|         | mle-/mle- | 1    | 25.047                  | 81.265                        |                                   |           |                  |                 |                      |
|         |           | 2    | 24.697                  | 90.724                        |                                   |           |                  |                 |                      |
| mir-283 | mle-/mle+ | 1    | 26.352                  | 48.723                        | 0.807                             | -0.309    | -0.165           | 0.204           | 0.2143               |
|         |           | 2    | 26.170                  | 46.630                        | 0.986                             | -0.021    |                  |                 |                      |
|         | mle-/mle- | 1    | 26.717                  | 38.996                        |                                   |           |                  |                 |                      |
|         |           | 2    | 25.887                  | 54.769                        |                                   |           |                  |                 |                      |
| mir-304 | mle-/mle+ | 1    | 33.859                  | 16.253                        | 1.264                             | 0.338     | 0.117            | 0.313           | 0.2913               |
|         |           | 2    | 33.412                  | 15.797                        | 0.930                             | -0.104    |                  |                 |                      |
|         | mle-/mle- | 1    | 33.445                  | 20.368                        |                                   |           |                  |                 |                      |
|         |           | 2    | 33.277                  | 17.510                        |                                   |           |                  |                 |                      |
| mir-12  | mle-/mle+ | 1    | 24.132                  | 19.072                        | 0.892                             | -0.165    | -0.164           | 0.002           | 0.0126               |
|         |           | 2    | 24.135                  | 18.169                        | 0.894                             | -0.162    |                  |                 |                      |
|         | mle-/mle- | 1    | 24.311                  | 16.868                        |                                   |           |                  |                 |                      |
|         |           | 2    | 24.037                  | 19.341                        |                                   |           |                  |                 |                      |
| mir-979 | mle-/mle+ | 1    | 32.007                  | 1533.669                      | 1.972                             | 0.980     | 0.550            | 0.607           | 0.3187               |
|         |           | 2    | 31.470                  | 404.038                       | 1.088                             | 0.121     |                  |                 |                      |
|         | mle-/mle- | 1    | 30.972                  | 2998.693                      |                                   |           |                  |                 |                      |
|         |           | 2    | 30.760                  | 523.538                       |                                   |           |                  |                 |                      |
| mir-210 | mle-/mle+ | 1    | 26.990                  | 1098.538                      | 1.579                             | 0.659     | 0.484            | 0.247           | 0.3002               |
|         |           | 2    | 26.722                  | 2357.685                      | 1.239                             | 0.309     |                  |                 |                      |
|         | mle-/mle- | 1    | 26.467                  | 1719.262                      |                                   |           |                  |                 |                      |
|         |           | 2    | 26.347                  | 3479.985                      |                                   |           |                  |                 |                      |
| U6      | mle-/mle+ | 1    | 16.909                  | 227.810                       | 1.506                             | 0.591     | 0.559            | 0.046           | 0.3274               |
|         |           | 2    | 16.978                  | 208.576                       | 1.440                             | 0.526     |                  |                 |                      |
|         | mle-/mle- | 1    | 16.296                  | 340.231                       |                                   |           |                  |                 |                      |
|         |           | 2    | 16.160                  | 357.836                       |                                   |           |                  |                 |                      |

a-e as in Table S11.
