# Supplementary material
Source: PubMed Central journal article supplement (PMC4196619)
Supplement: supp_114.169268_TableS17.pdf [file supp_114.169268_TableS17.pdf]

**Table S17: Levels of let-7 miRNA in adult females and males**

| Tissue              |       | $C_T$ let-7<br>± StDev | $C_T$ 2SrRNA<br>± StDev | $\Delta C_T$ ( $\Delta C_T$<br>let-7 - $\Delta C_T$<br>2SrRNA) <sup>a</sup> | $\Delta\Delta C_T$ ( $\Delta C_T$ -<br>$\Delta C_T$ control) <sup>b</sup> | Average<br>$\Delta\Delta C_T$ ±<br>StDev | Fold<br>Difference <sup>c</sup>                     |
|---------------------|-------|------------------------|-------------------------|-----------------------------------------------------------------------------|---------------------------------------------------------------------------|------------------------------------------|-----------------------------------------------------|
| Female<br>carcasses | Exp 1 | 25.33±0.30             | 6.14±0.24               | 19.19±0.39                                                                  | 0.00±0.39                                                                 | 0.00±0.28                                | 1.00<br>(0.82 - 1.22)                               |
|                     | Exp 2 | 26.35±0.30             | 8.29±0.36               | 18.06±0.47                                                                  | 0.00±0.47                                                                 |                                          |                                                     |
| Germaria            | Exp 1 | 22.18±0.18             | 6.29±0.09               | 15.90±0.20                                                                  | 3.29±0.20                                                                 | -2.24±0.11                               | 4.72<br>(4.38 - 5.09)<br>p=7.76x10 <sup>-6***</sup> |
|                     | Exp 2 | 22.35±0.05             | 7.72±0.11               | 14.63±0.12                                                                  | 3.43±0.12                                                                 |                                          |                                                     |
| Male<br>carcasses   | Exp 1 | 22.71±0.11             | 7.10±0.03               | 15.61±0.12                                                                  | 3.58±0.12                                                                 | -1.92±0.09                               | 3.79<br>(3.57 - 4.02)<br>p=1.55x10 <sup>-6***</sup> |
|                     | Exp 2 | 23.68±0.08             | 7.80±0.12               | 15.88±0.14                                                                  | 2.18±0.14                                                                 |                                          |                                                     |
| Testes              | Exp 1 | 21.14±0.26             | 6.56±0.03               | 14.58±0.26                                                                  | 4.61±0.26                                                                 | -2.89±0.12                               | 7.43<br>(6.84 - 8.07)<br>p=7.73x10 <sup>-8***</sup> |
|                     | Exp 2 | 22.40±0.05             | 8.41±0.09               | 13.99±0.10                                                                  | 4.07±0.10                                                                 |                                          |                                                     |

a:  $\Delta C_T$  was determined by subtracting the average 2SrRNA  $C_T$  value from the average Experimental  $C_T$  value. The standard deviation of the difference is calculated from the standard deviation of the Experimental and 2SrRNA values using the formula  $s = \sqrt{(s_1^2 + s_2^2)}$  where s = standard deviation

b:  $\Delta\Delta C_T$  is calculated by subtracting the  $\Delta C_T$  control value ( $\Delta C_T$  of female carcasses). The standard deviation is the same as for  $\Delta C_T$

c: the fold difference between the Experimental Sample and the control is calculated by:  $2^{\pm\Delta\Delta C_T}$  with  $\Delta\Delta C_T$  -s and  $\Delta\Delta C_T$  -s where s is the standard deviation of  $\Delta\Delta C_T$  value. The fold difference of the experimental values was compared to the respective control. P-value was calculated using the two tailed Students t-test. \*p<0.05. \*\*p<0.005. \*\*\*p<0.0005
