# Supplementary material
Source: PubMed Central journal article supplement (PMC4196619)
Supplement: supp_114.169268_TableS18.pdf [file supp_114.169268_TableS18.pdf]

**Table S18: Levels of sex specific mRNAs in  $\Delta let-7$  females and males**

| Genotype |                                             | $C_T$ <i>SxIF</i><br>$\pm$ StDev | $C_T$ <i>RpL32</i><br>$\pm$ StDev | $\Delta C_T$ ( $\Delta C_T$<br><i>SxIF</i> - $\Delta C_T$<br><i>RpL32</i> ) <sup>a</sup> | $\Delta\Delta C_T$ ( $\Delta C_T$ -<br>$\Delta C_T$ control) <sup>b</sup> | Fold Difference <sup>c</sup>                      |
|----------|---------------------------------------------|----------------------------------|-----------------------------------|------------------------------------------------------------------------------------------|---------------------------------------------------------------------------|---------------------------------------------------|
| Females  | <b>Control:</b><br><i>let-7-C</i><br>Rescue | 16.15 $\pm$ 0.22                 | 11.32 $\pm$ 0.12                  | 4.83 $\pm$ 0.25                                                                          | 0.00 $\pm$ 0.25                                                           | 1.00 (0.840-1.190)                                |
|          | <b><math>\Delta let-7</math></b>            | 15.95 $\pm$ 0.03                 | 11.16 $\pm$ 0.09                  | 4.78 $\pm$ 0.25                                                                          | -0.05 $\pm$ 0.09                                                          | 1.033 (0.969-1.102)<br>p=0.70                     |
| Males    | <b>Control:</b><br><i>let-7-C</i><br>Rescue | 21.48 $\pm$ 0.12                 | 12.28 $\pm$ 0.16                  | 9.21 $\pm$ 0.20                                                                          | 0.00 $\pm$ 0.20                                                           | 1.00 (0.872-1.147)                                |
|          | <b><math>\Delta let-7</math></b>            | 18.89 $\pm$ 0.09                 | 12.20 $\pm$ 0.22                  | 6.69 $\pm$ 0.23                                                                          | -2.51 $\pm$ 0.23                                                          | 5.704 (4.853-6.705)<br>1.73x10 <sup>-4</sup> ***  |
| Genotype |                                             | $C_T$ <i>tra1</i><br>$\pm$ StDev | $C_T$ <i>RpL32</i><br>$\pm$ StDev | $\Delta C_T$ ( $\Delta C_T$<br><i>tra1</i> - $\Delta C_T$<br><i>RpL32</i> ) <sup>a</sup> | $\Delta\Delta C_T$ ( $\Delta C_T$ -<br>$\Delta C_T$ control) <sup>b</sup> | Fold Difference <sup>c</sup>                      |
| Females  | <b>Control:</b><br><i>let-7-C</i><br>Rescue | 21.30 $\pm$ 0.13                 | 11.32 $\pm$ 0.12                  | 9.98 $\pm$ 0.17                                                                          | 0.00 $\pm$ 0.17                                                           | 1.00 (0.886-1.129)                                |
|          | <b><math>\Delta let-7</math></b>            | 20.72 $\pm$ 0.14                 | 11.16 $\pm$ 0.09                  | 9.56 $\pm$ 0.16                                                                          | -0.42 $\pm$ 0.16                                                          | 1.334 (1.190-1.495)<br>p=0.06                     |
| Males    | <b>Control:</b><br><i>let-7-C</i><br>Rescue | 29.84 $\pm$ 0.03                 | 12.28 $\pm$ 0.16                  | 17.57 $\pm$ 0.16                                                                         | 0.00 $\pm$ 0.16                                                           | 1.00 (0.896-1.116)                                |
|          | <b><math>\Delta let-7</math></b>            | 29.66 $\pm$ 0.09                 | 12.20 $\pm$ 0.22                  | 17.46 $\pm$ 0.23                                                                         | -0.11 $\pm$ 0.23                                                          | 1.079 (0.917-1.270)<br>p=0.40                     |
| Genotype |                                             | $C_T$ <i>DsxM</i><br>$\pm$ StDev | $C_T$ <i>RpL32</i><br>$\pm$ StDev | $\Delta C_T$ ( $\Delta C_T$<br><i>DsxM</i> - $\Delta C_T$<br><i>RpL32</i> ) <sup>a</sup> | $\Delta\Delta C_T$ ( $\Delta C_T$ -<br>$\Delta C_T$ control) <sup>b</sup> | Fold Difference <sup>c</sup>                      |
| Females  | <b>Control:</b><br><i>let-7-C</i><br>Rescue | 25.23 $\pm$ 0.09                 | 11.32 $\pm$ 0.12                  | 13.90 $\pm$ 0.15                                                                         | 0.00 $\pm$ 0.15                                                           | 1.00 (0.900-1.111)                                |
|          | <b><math>\Delta let-7</math></b>            | 25.69 $\pm$ 0.05                 | 11.16 $\pm$ 0.09                  | 14.52 $\pm$ 0.10                                                                         | 0.62 $\pm$ 0.10                                                           | 0.649 (0.605-0.697)<br>p=1.83x10 <sup>-3</sup> ** |
| Males    | <b>Control:</b><br><i>let-7-C</i><br>Rescue | 17.89 $\pm$ 0.33                 | 12.28 $\pm$ 0.16                  | 5.61 $\pm$ 0.37                                                                          | 0.00 $\pm$ 0.37                                                           | 1.00 (0.950-1.052)                                |
|          | <b><math>\Delta let-7</math></b>            | 17.94 $\pm$ 0.03                 | 12.20 $\pm$ 0.22                  | 5.74 $\pm$ 0.22                                                                          | 0.30 $\pm$ 0.17                                                           | 0.914 (0.786-1.062)<br>0.75                       |

| Genotype |                                      | $C_T$ <i>Yp1</i><br>± StDev | $C_T$ <i>RpL32</i><br>± StDev | $\Delta C_T$ ( $\Delta C_T$<br><i>Yp1</i> - $\Delta C_T$<br><i>RpL32</i> ) <sup>a</sup> | $\Delta\Delta C_T$ ( $\Delta C_T$ -<br>$\Delta C_T$ control) <sup>b</sup> | Fold Difference <sup>c</sup>                      |
|----------|--------------------------------------|-----------------------------|-------------------------------|-----------------------------------------------------------------------------------------|---------------------------------------------------------------------------|---------------------------------------------------|
| Females  | Control:<br><i>let-7-C</i><br>Rescue | 10.33±0.07                  | 11.32±0.12                    | -1.00±0.14                                                                              | 0.00±0.14                                                                 | 1.00 (0.908-1.101)                                |
|          | $\Delta$ <i>let-7</i>                | 12.93±0.10                  | 11.16±0.09                    | 1.77±0.13                                                                               | 2.76±0.13                                                                 | 0.147 (0.134-0.162)<br>p=3.29x10 <sup>-6***</sup> |
| Males    | Control:<br><i>let-7-C</i><br>Rescue | 25.99±0.05                  | 12.28±0.16                    | 13.71±0.16                                                                              | 0.00±0.16                                                                 | 1.00 (0.894-1.119)                                |
|          | $\Delta$ <i>let-7</i>                | 25.01±0.13                  | 12.20±0.22                    | 12.81±0.25                                                                              | -0.90±0.25                                                                | 1.867 (1.568-2.223)<br>p=9.85x10 <sup>-4**</sup>  |

a:  $\Delta C_T$  was determined by subtracting the average *RpL32*  $C_T$  value from the average Experimental  $C_T$  value. The standard deviation of the difference is calculated from the standard deviation of the Experimental and *RpL32* values using the formula  $s = \sqrt{(s_1^2 + s_2^2)}$  where s = standard deviation

b:  $\Delta\Delta C_T$  is calculated by subtracting the  $\Delta C_T$  control. The standard deviation is the same as for  $\Delta C_T$

c: the fold difference between the Experimental Sample and the control is calculated by:  $2^{-\Delta\Delta C_T}$  with  $\Delta\Delta C_T + s$  and  $\Delta\Delta C_T - s$  where s is the standard deviation of  $\Delta\Delta C_T$  value. The fold difference of the experimental values was compared to the respective control. P-value was calculated using the two tailed Students t-test. \*p<0.05, \*\*p<0.005. \*\*\*p<0.0005
