# Supplementary material
Source: PubMed Central journal article supplement (PMC4196619)
Supplement: supp_114.169268_TableS19.pdf [file supp_114.169268_TableS19.pdf]

**Table S19: *let-7* expression depends on ecdysone signaling in adult ovaries and testes**

|         | Genotype, conditions                       | $C_T$ <i>let-7</i> ± StDev <sup>a</sup> | $C_T$ <i>RpL32</i> ± StDev  | $\Delta C_T$ ( $\Delta C_T$ <i>let-7</i> - $\Delta C_T$ <i>RpL32</i> ) <sup>a</sup>  | $\Delta\Delta C_T$ ( $\Delta C_T$ - $\Delta C_T^{\text{control}}$ ) <sup>b</sup> | Fold Difference <sup>c</sup>                      | Relative change of <i>let-7</i> levels <sup>d</sup> |
|---------|--------------------------------------------|-----------------------------------------|-----------------------------|--------------------------------------------------------------------------------------|----------------------------------------------------------------------------------|---------------------------------------------------|-----------------------------------------------------|
| Females | <i>OregonR</i> , 4d at 18°C                | 25.88±0.16                              | 14.13±0.21                  | 11.74±0.06                                                                           | 0.00±0.06                                                                        | 1.00<br>(0.96-1.04)                               | 1.00<br>(0.88-1.13)                                 |
|         | <i>OregonR</i> , 4d at 29°C                | 25.00±0.04                              | 14.39±0.17                  | 10.58±0.18                                                                           | -1.16±0.18                                                                       | 2.24<br>(1.98-2.54)<br>p=2.01×10 <sup>-5***</sup> |                                                     |
|         | <i>ecd1<sup>ts 4210</sup></i> , 4d at 18°C | 24.07±0.04                              | 13.42±0.28                  | 10.65±0.05                                                                           | 0.00±0.05                                                                        | 1.00<br>(0.97-1.03)                               | 0.38<br>(0.37-0.38)<br>p=2.44×10 <sup>-4***</sup>   |
|         | <i>ecd1<sup>ts 4210</sup></i> , 4d at 29°C | 24.80±0.15                              | 13.96±0.45                  | 10.92±0.001                                                                          | 0.27±0.001                                                                       | 0.84<br>(0.84-0.84)<br>p=0.14                     |                                                     |
|         | Genotype, conditions                       | $C_T$ <i>let-7</i> ± StDev              | $C_T$ <i>S2rRNA</i> ± StDev | $\Delta C_T$ ( $\Delta C_T$ <i>let-7</i> - $\Delta C_T$ <i>S2rRNA</i> ) <sup>a</sup> | $\Delta\Delta C_T$ ( $\Delta C_T$ - $\Delta C_T^{\text{control}}$ ) <sup>b</sup> | Fold Difference <sup>c</sup>                      | Relative change of <i>let-7</i> levels <sup>d</sup> |
| Males   | <i>OregonR</i> , 4d at 18°C                | 22.90±0.03                              | 8.41±0.11                   | 14.49±0.13                                                                           | 0.00±0.13                                                                        | 1.00<br>(0.91-1.09)                               | 1.00<br>(0.92-1.08)                                 |
|         | <i>OregonR</i> , 4d at 29°C                | 22.55±0.03                              | 8.35±0.12                   | 14.20±0.12                                                                           | -0.29±0.12                                                                       | 1.23<br>(1.14-1.33)<br>p=0.02*                    |                                                     |
|         | <i>ecd1<sup>ts 4210</sup></i> , 4d at 18°C | 22.13±0.55                              | 8.33±0.09                   | 13.80±0.15                                                                           | 0.00±0.15                                                                        | 1.00<br>(0.90-1.11)                               | 0.24<br>(0.23-0.25)<br>p=1.77×10 <sup>-4***</sup>   |
|         | <i>ecd1<sup>ts 4210</sup></i> , 4d at 29°C | 23.49±0.02                              | 7.87±0.11                   | 15.64±0.08                                                                           | 1.85±0.08                                                                        | 0.29<br>(0.28-0.31)<br>p=3.59×10 <sup>-4***</sup> |                                                     |

a:  $\Delta C_T$  values were determined by subtracting the average *RpL32* or *2SrRNA*  $C_T$  value from the average Experimental  $C_T$  value. The standard deviation of the difference is calculated from the standard deviation of the Experimental and *RpL32* or *2SrRNA* values using the formula  $s = \sqrt{(s_1^2 + s_2^2)}$  where s = standard deviation

b:  $\Delta\Delta C_T$  is calculated by subtracting the  $\Delta C_T$  control value ( $\Delta C_T$  of the respective genotype at 18°C). The standard deviation is the same as for  $\Delta C_T$

c: the fold difference between the Experimental Sample and the control is calculated by:  $2^{-\Delta\Delta C_T}$  with  $\Delta\Delta C_T + s$  and  $\Delta\Delta C_T - s$  where s is the standard deviation of  $\Delta\Delta C_T$  value. The fold difference of the experimental values was compared to the respective control. P-value between  $\Delta C_T$  values of the experiments was calculated using the two tailed Students t-test

d: The relative changes of *let-7* levels were calculated by dividing the fold difference ranges of *ecd1<sup>ts</sup>* and *OrR*. Students T-test was used to compare the relative changes  
\*p<0.05, \*\*p<0.005
