# Supplementary material
Source: PubMed Central journal article supplement (PMC4196619)
Supplement: supp_114.169268_TableS20.pdf [file supp_114.169268_TableS20.pdf]

**Table S20: Levels of sex specific mRNAs are misregulated upon ecdysone deficit**

| Genotype, conditions |                                   | $C_T$ <i>DsxM</i> ± StDev | $C_T$ <i>Rpl32</i> ± StDev | $\Delta C_T$ ( $\Delta C_T$ <i>DsxM</i> - $\Delta C_T$ <i>Rpl32</i> ) <sup>a</sup> | $\Delta\Delta C_T$ ( $\Delta C_T$ - $\Delta C_T$ control) <sup>b</sup> | Fold Difference <sup>c</sup> |                                                  |
|----------------------|-----------------------------------|---------------------------|----------------------------|------------------------------------------------------------------------------------|------------------------------------------------------------------------|------------------------------|--------------------------------------------------|
| Females              | Control: <i>OrR</i>               | 18°C                      | 26.20±0.07                 | 15.40±0.20                                                                         | 10.80±0.21                                                             | 0.00±0.21                    | 1.00 (0.866-1.155)                               |
|                      | <i>OrR</i>                        | 29°C                      | 26.34±0.01                 | 13.95±0.03                                                                         | 12.39±0.03                                                             | 1.58±0.03                    | 0.334 (0.326-0.341)<br>p=3.73x10 <sup>-3**</sup> |
|                      | Control: <i>ecd1<sup>ts</sup></i> | 18°C                      | 26.41±0.07                 | 13.69±0.07                                                                         | 12.72±0.10                                                             | 0.00±0.10                    | 1.00 (0.935-1.070)                               |
|                      | <i>ecd1<sup>ts</sup></i>          | 29°C                      | 25.88±0.12                 | 14.36±0.07                                                                         | 11.52±0.14                                                             | -1.20±0.14                   | 2.299 (2.081-2.539)<br>2.59x10 <sup>-4***</sup>  |
| Males                | Control: <i>OrR</i>               | 18°C                      | 17.84±0.04                 | 15.67±0.15                                                                         | 2.17±0.16                                                              | 0.00±0.16                    | 1.00 (0.896-1.116)                               |
|                      | <i>OrR</i>                        | 29°C                      | 18.17±0.06                 | 15.45±0.29                                                                         | 2.72±0.30                                                              | 0.55±0.30                    | 0.681 (0.553-0.838)<br>p=0.06                    |
|                      | Control: <i>ecd1<sup>ts</sup></i> | 18°C                      | 18.40±0.02                 | 15.77±0.20                                                                         | 2.63±0.20                                                              | 0.00±0.20                    | 1.00 (0.868-1.152)                               |
|                      | <i>ecd1<sup>ts</sup></i>          | 29°C                      | 18.04±0.05                 | 14.60±0.14                                                                         | 3.45±0.25                                                              | 0.81±0.15                    | 0.569 (0.511-0.633)<br>p=7.97x10 <sup>-3*</sup>  |

| Genotype, conditions |                                   | $C_T$ <i>Esg</i> ± StDev | $C_T$ <i>Rpl32</i> ± StDev | $\Delta C_T$ ( $\Delta C_T$ <i>Esg</i> - $\Delta C_T$ <i>Rpl32</i> ) <sup>a</sup> | $\Delta\Delta C_T$ ( $\Delta C_T$ - $\Delta C_T$ control) <sup>b</sup> | Fold Difference <sup>c</sup> |                                                 |
|----------------------|-----------------------------------|--------------------------|----------------------------|-----------------------------------------------------------------------------------|------------------------------------------------------------------------|------------------------------|-------------------------------------------------|
| Females              | Control: <i>OrR</i>               | 18°C                     | 29.30±0.09                 | 15.40±0.20                                                                        | 13.90±0.22                                                             | 0.00±0.22                    | 1.00 (0.862-1.161)                              |
|                      | <i>OrR</i>                        | 29°C                     | 27.90±0.08                 | 13.95±0.03                                                                        | 13.94±0.09                                                             | 0.04±0.09                    | 0.970 (0.912-1.032)<br>p=0.81                   |
|                      | Control: <i>ecd1<sup>ts</sup></i> | 18°C                     | 24.39±0.28                 | 13.69±0.07                                                                        | 10.70±0.28                                                             | 0.00±0.28                    | 1.00 (0.821-1.218)                              |
|                      | <i>ecd1<sup>ts</sup></i>          | 29°C                     | 24.69±0.22                 | 14.36±0.07                                                                        | 10.33±0.24                                                             | -0,37±0.24                   | 1.293 (1.097-1.523)<br>p=0.07                   |
| Males                | Control: <i>OrR</i>               | 18°C                     | 26.86±0.05                 | 15.67±0.15                                                                        | 11.19±0.16                                                             | 0.00±0.16                    | 1.00 (0.894-1.119)                              |
|                      | <i>OrR</i>                        | 29°C                     | 27.48±0.00 <sub>3</sub>    | 15.45±0.29                                                                        | 12.03±0.29                                                             | 0.84±0.29                    | 0.559 (0.456-0.685)<br>p=0.55                   |
|                      | Control: <i>ecd1<sup>ts</sup></i> | 18°C                     | 25.89±0.02                 | 15.77±0.20                                                                        | 10.12±0.20                                                             | 0.00±0.20                    | 1.00 (0.868-1.152)                              |
|                      | <i>ecd1<sup>ts</sup></i>          | 29°C                     | 25.34±0.13                 | 14.60±0.14                                                                        | 10.75±0.20                                                             | 0.63±0.20                    | 0.648 (0.566-0.742)<br>p=8.77x10 <sup>-3*</sup> |

| Genotype, conditions |                                   | $C_T$ <i>SxIF11</i> ± StDev | $C_T$ <i>Rpl32</i> ± StDev | $\Delta C_T$ ( $\Delta C_T$ <i>SxIF11</i> - $\Delta C_T$ <i>Rpl32</i> ) <sup>a</sup> | $\Delta\Delta C_T$ ( $\Delta C_T$ - $\Delta C_T$ control) <sup>b</sup> | Fold Difference <sup>c</sup> |                                                  |
|----------------------|-----------------------------------|-----------------------------|----------------------------|--------------------------------------------------------------------------------------|------------------------------------------------------------------------|------------------------------|--------------------------------------------------|
| Females              | Control: <i>OrR</i>               | 18°C                        | 17.81±0.08                 | 15.40±0.20                                                                           | 2.41±0.21                                                              | 0.00±0.21                    | 1.00 (0.864-1.158)                               |
|                      | <i>OrR</i>                        | 29°C                        | 15.96±0.16                 | 13.95±0.03                                                                           | 2.00±0.16                                                              | -0.41±0.16                   | 1.330 (1.189-1.487)<br>p=5.00x10 <sup>-2*</sup>  |
|                      | Control: <i>ecd1<sup>ts</sup></i> | 18°C                        | 16.02±0.04                 | 13.69±0.07                                                                           | 2.33±0.08                                                              | 0.00±0.08                    | 1.00 (0.947-1.056)                               |
|                      | <i>ecd1<sup>ts</sup></i>          | 29°C                        | 16.18±0.16                 | 14.36±0.07                                                                           | 1.82±0.17                                                              | -0.51±0.17                   | 1.424 (1.262-1.607)<br>p=1.64x10 <sup>-3**</sup> |
| Males                | Control: <i>OrR</i>               | 18°C                        | 21.05±0.12                 | 15.67±0.15                                                                           | 5.38±0.20                                                              | 0.00±                        | 1.00 (0.873-1.146)                               |
|                      | <i>OrR</i>                        | 29°C                        | 21.44±0.07                 | 15.45±0.29                                                                           | 5.99±0.30                                                              | 0.61±                        | 0.653 (0.530-0.805)<br>p=0.15                    |
|                      | Control: <i>ecd1<sup>ts</sup></i> | 18°C                        | 22.24±0.12                 | 15.77±0.20                                                                           | 6.47±0.24                                                              | 0.00±                        | 1.00 (0.848-1.179)                               |
|                      | <i>ecd1<sup>ts</sup></i>          | 29°C                        | 19.38±0.07                 | 14.60±0.14                                                                           | 4.78±0.16                                                              | -1.69±                       | 3.222 (2.883-3.600)<br>p=9.13x10 <sup>-3**</sup> |

| Genotype, conditions |                                   | $C_T$ <i>tra1</i> ± StDev | $C_T$ <i>Rpl32</i> ± StDev | $\Delta C_T$ ( $\Delta C_T$ <i>tra1</i> - $\Delta C_T$ <i>Rpl32</i> ) <sup>a</sup> | $\Delta\Delta C_T$ ( $\Delta C_T$ - $\Delta C_T$ control) <sup>b</sup> | Fold Difference <sup>c</sup> |                                                      |
|----------------------|-----------------------------------|---------------------------|----------------------------|------------------------------------------------------------------------------------|------------------------------------------------------------------------|------------------------------|------------------------------------------------------|
| Females              | Control: <i>OrR</i>               | 18°C                      | 21.04±0.05                 | 15.40±0.20                                                                         | 5.64±0.20                                                              | 0.00±0.20                    | 1.00 (0.868-1.152)                                   |
|                      | <i>OrR</i>                        | 29°C                      | 19.87±0.11                 | 13.95±0.03                                                                         | 5.92±0.11                                                              | 0.28±0.11                    | 0.826 (0.765-0.891)<br>p=0.14                        |
|                      | Control: <i>ecd1<sup>ts</sup></i> | 18°C                      | 20.01±0.08                 | 13.69±0.07                                                                         | 6.32±0.11                                                              | 0.00±0.11                    | 1.00 (0.927-1.079)                                   |
|                      | <i>ecd1<sup>ts</sup></i>          | 29°C                      | 20.69±0.11                 | 14.36±0.07                                                                         | 6.33±0.13                                                              | 0.008±0.13                   | 0.994 (0.909-1.088)<br>p=0.93                        |
| Males                | Control: <i>OrR</i>               | 18°C                      | 28.84±0.09                 | 15.67±0.15                                                                         | 13.18±0.18                                                             | 0.00±0.18                    | 1.00 (0.885-1.129)                                   |
|                      | <i>OrR</i>                        | 29°C                      | 28.67±0.05                 | 15.45±0.29                                                                         | 13.22±0.30                                                             | 0.05±0.30                    | 0.969 (0.789-1.190)<br>p=0.73                        |
|                      | Control: <i>ecd1<sup>ts</sup></i> | 18°C                      | 28.69±0.12                 | 15.77±0.20                                                                         | 12.92±0.23                                                             | 0.00±0.23                    | 1.00 (0.850-1.176)                                   |
|                      | <i>ecd1<sup>ts</sup></i>          | 29°C                      | 23.68±0.06                 | 14.60±0.14                                                                         | 9.08±0.16                                                              | -3.84±0.16                   | 14.277 (12.801-15.924)<br>p=1.76x10 <sup>-5***</sup> |

| Genotype, conditions |                                      | $C_T$ <i>Yp1</i><br>± StDev | $C_T$ <i>Rpl32</i><br>± StDev | $\Delta C_T$ ( $\Delta C_T$<br><i>Yp1</i> - $\Delta C_T$<br><i>Rpl32</i> ) <sup>a</sup> | $\Delta\Delta C_T$<br>( $\Delta C_T$ - $\Delta C_T$<br>control) <sup>b</sup> | Fold Difference <sup>c</sup> |                                                         |
|----------------------|--------------------------------------|-----------------------------|-------------------------------|-----------------------------------------------------------------------------------------|------------------------------------------------------------------------------|------------------------------|---------------------------------------------------------|
| Females              | Control:<br><i>OrR</i>               | 18°C                        | 12.33±0.14                    | 15.40±0.20                                                                              | -3.07±0.24                                                                   | 0.00±0.24                    | 1.00 (0.846-1.182)                                      |
|                      | <i>OrR</i>                           | 29°C                        | 11.21±0.23                    | 13.95±0.03                                                                              | -2.74±0.23                                                                   | 0.33±0.23                    | 0.794 (0.678-0.930)<br>p=0.12                           |
|                      | Control:<br><i>ecd1<sup>ts</sup></i> | 18°C                        | 10.86±0.31                    | 13.69±0.07                                                                              | -2.82±0.32                                                                   | 0.00±0.32                    | 1.00 (0.800-1.249)                                      |
|                      | <i>ecd1<sup>ts</sup></i>             | 29°C                        | 11.24±0.20                    | 14.36±0.07                                                                              | -3.12±0.21                                                                   | -0.30±0.21                   | 1.231 (1.061-1.428)<br>p=0.15                           |
| Males                | Control:<br><i>OrR</i>               | 18°C                        | 26.15±0.11                    | 15.67±0.15                                                                              | 10.48±0.19                                                                   | 0.00±0.19                    | 1.00 (0.876-1.142)                                      |
|                      | <i>OrR</i>                           | 29°C                        | 25.57±0.03                    | 15.45±0.29                                                                              | 10.12±0.29                                                                   | -0.36±0.29                   | 1.285 (1.048-1.576)<br>p=0.14                           |
|                      | Control:<br><i>ecd1<sup>ts</sup></i> | 18°C                        | 24.63±0.08                    | 15.77±0.20                                                                              | 8.86±0.22                                                                    | 0.00±0.22                    | 1.00 (0.86-1.163)                                       |
|                      | <i>ecd1<sup>ts</sup></i>             | 29°C                        | 16.76±0.06                    | 14.60±0.14                                                                              | 2.16±0.16                                                                    | -6.702±0.16                  | 104.080 (93.395-115.987)<br>p=3.22x10 <sup>-6</sup> *** |

a:  $\Delta C_T$  was determined by subtracting the average *RpL32*  $C_T$  value from the average Experimental  $C_T$  value. Since the same set of samples was used for all PCRs, the same *RpL32*  $C_T$  values are used as internal control. The standard deviation of the difference is calculated from the standard deviation of the Experimental and *RpL32* values using the formula  $s = \sqrt{(s_1^2 + s_2^2)}$  where  $s$  = standard deviation.

b:  $\Delta\Delta C_T$  is calculated by subtracting the  $\Delta C_T$  control value ( $\Delta C_T$  of the sample of the respective sex and genotype at 18°C). The standard deviation is the same as for  $\Delta C_T$ .

c: the fold difference between the Experimental Sample and the control is calculated by:  $2^{-\Delta\Delta C_T}$  with  $\Delta\Delta C_T + s$  and  $\Delta\Delta C_T - s$  where  $s$  is the standard deviation of  $\Delta\Delta C_T$  value. The fold difference of the experimental values was compared to the respective control. P-value was calculated using the two tailed Students t-test. \*p<0.05, \*\*p<0.005. \*\*\*p<0.0005.
