# Supplementary material
Source: PubMed Central journal article supplement (PMC4196619)
Supplement: supp_114.169268_TableS21.pdf [file supp_114.169268_TableS21.pdf]

**Table S21. Ecdysteroid deficit leads to differentiation defects in the CySC lineage cells in adult testes**

| Genotype, conditions                                      | Clustering of somatic cyst cells |           |            |         | Appearance of epithelium-like clusters |        |         |           |
|-----------------------------------------------------------|----------------------------------|-----------|------------|---------|----------------------------------------|--------|---------|-----------|
|                                                           | < 5 cells                        | ≥ 5 cells | > 10 cells | P value | None                                   | Apical | Lateral | P value   |
| Control:<br><i>ecd<sup>1ts</sup></i> ,<br>5 days, 18°     | 40%                              | 60%       | 0%         |         | 100%                                   | 0%     | 0%      |           |
| <i>ecd<sup>1ts</sup></i> ,<br>5 days, 29°                 | 7%                               | 57%       | 36%        | 0.0368* | 43%                                    | 43%    | 14%     | 0.0137*   |
| Control:<br><i>ecd<sup>1ts</sup></i> ,<br>11 days,<br>18° | 50%                              | 50%       | 0%         |         | 83%                                    | 17%    | 0%      |           |
| <i>ecd<sup>1ts</sup></i> ,<br>11 days,<br>29°             | 17%                              | 8%        | 75%        | 0.0113* | 0%                                     | 50%    | 50%     | 0.0001*** |

To calculate the significance two-way tables and chi-squared test with 2 degrees of freedom were used. The frequencies of the testes with the somatic cell clustering phenotype (<5, ≥ 5 or >10 somatic cell in the cluster) and the frequencies of the testes with epithelial sheets (none, apical or lateral) acquired by induction of ecdysone deficit for 5d or 11d at the restrictive temperature (29°) were compared to the frequencies of the same phenotypes in flies with the same genotype but kept for the same periods of time (5d or 11d) at the permissive temperature (18°). N=10-20 testes for each genotype. \*p<0.05, \*\*p<0.005. \*\*\*p<0.0005.
