# Supplementary material
Source: PubMed Central journal article supplement (PMC4196619)
Supplement: supp_114.169268_TableS22.pdf [file supp_114.169268_TableS22.pdf]

TABLE S22: Ranked abundance of miRNAs in each sexed library (Complete list)

| Chrom | Late embryo Lymphoid Cells |          |           |          | L3 Larvae Salivary Glands |                |           |                | Adult Head |            |          |            | Adult Body |            |           |            | Adult Gonads |            |           |           |
|-------|----------------------------|----------|-----------|----------|---------------------------|----------------|-----------|----------------|------------|------------|----------|------------|------------|------------|-----------|------------|--------------|------------|-----------|-----------|
|       | miRNA                      | S2 M (%) | miRNA     | Kc F (%) | miRNA                     | S. Gland M (%) | miRNA     | S. Gland F (%) | miRNA      | Head M (%) | miRNA    | Head F (%) | miRNA      | Body M (%) | miRNA     | Body F (%) | miRNA        | Testis (%) | miRNA     | Ovary (%) |
| chr2R | mir-14                     | 38.35286 | mir-14    | 29.10042 | mir-8                     | 32.42188       | mir-8     | 35.66808       | mir-8      | 14.57004   | mir-8    | 11.43554   | mir-1      | 25.56082   | mir-1     | 26.75240   | mir-12       | 16.87054   | mir-989   | 18.37262  |
| chr2R | mir-184                    | 11.34536 | mir-184   | 16.37821 | mir-263a                  | 10.45437       | mir-12    | 8.49222        | mir-1      | 9.99692    | mir-1    | 8.17673    | mir-8      | 23.01229   | mir-8     | 25.64450   | mir-8        | 15.35016   | bantam    | 11.43364  |
| chr3L | bantam                     | 7.44158  | mir-263a  | 4.44288  | mir-375                   | 7.52355        | bantam    | 7.75277        | bantam     | 8.19215    | mir-276a | 7.62653    | bantam     | 12.55761   | bantam    | 9.78819    | mir-305      | 5.03802    | mir-8     | 9.30021   |
| chr3R | mir-996                    | 4.85129  | mir-8     | 4.14932  | mir-12                    | 6.25415        | mir-375   | 6.71742        | mir-276a   | 5.81087    | bantam   | 7.13572    | mir-276a   | 4.65975    | mir-276   | 5.02046    | mir-959      | 4.67717    | mir-2a    | 7.27512   |
| chr3R | mir-279                    | 3.46812  | bantam    | 4.07801  | mir-304                   | 5.72874        | mir-282   | 6.30407        | mir-276    | 5.39112    | mir-210  | 4.99725    | mir-277    | 3.91230    | mir-276a  | 4.27473    | mir-2a       | 3.85408    | mir-318   | 7.24950   |
| chr3R | mir-11                     | 3.29268  | mir-34    | 3.39610  | mir-275                   | 5.19227        | mir-304   | 6.00679        | mir-277    | 4.66334    | mir-277  | 4.90334    | mir-276    | 2.46689    | mir-2a    | 2.93279    | let-7        | 3.13374    | mir-184   | 6.40474   |
| chr3R | mir-34                     | 2.93382  | mir-988   | 3.37195  | bantam                    | 4.71150        | bantam    | 4.82103        | mir-184    | 4.05515    | mir-184  | 4.17368    | mir-2a     | 2.19543    | mir-277   | 2.68239    | mir-34       | 3.10799    | mir-996   | 5.91867   |
| chr2R | mir-988                    | 2.89604  | mir-317   | 3.14547  | mir-2a                    | 3.04332        | mir-11    | 2.45542        | mir-34     | 3.57697    | mir-34   | 3.61372    | mir-996    | 1.54310    | mir-989   | 1.76169    | mir-282      | 3.00171    | mir-2b    | 3.30079   |
| chr3L | mir-282                    | 2.84211  | mir-2b    | 3.10880  | mir-305                   | 2.73388        | mir-13b   | 2.44753        | mir-2b     | 3.41702    | mir-14   | 3.20424    | let-7      | 1.48826    | mir-282   | 1.68466    | mir-964      | 2.74226    | mir-994   | 3.00554   |
| chr3R | mir-252                    | 2.78986  | mir-276   | 2.30014  | mir-2b                    | 2.43359        | mir-305   | 1.92719        | mir-2a     | 3.22916    | mir-285  | 2.95344    | mir-9a     | 1.48086    | mir-31a   | 1.48123    | mir-277      | 2.58692    | mir-275   | 2.61547   |
| chr3R | mir-13b                    | 2.42533  | mir-996   | 2.29723  | mir-13b                   | 1.98678        | mir-2a    | 1.91021        | mir-285    | 3.21797    | mir-2a   | 2.92097    | mir-14     | 1.34500    | mir-2b    | 1.20586    | mir-11       | 2.50748    | mir-13b   | 2.19972   |
| chr2L | mir-2b                     | 2.09460  | mir-279   | 2.25699  | mir-11                    | 1.91047        | mir-2b    | 1.55036        | mir-14     | 2.46292    | mir-2b   | 2.73268    | mir-31a    | 1.27792    | mir-9a    | 1.18265    | mir-978      | 2.29276    | mir-9b    | 2.19650   |
| chr3R | mir-317                    | 1.92167  | mir-13b   | 2.19551  | mir-283                   | 1.78685        | mir-283   | 1.53792        | mir-210    | 2.26200    | mir-276  | 2.17511    | mir-282    | 1.19888    | mir-996   | 1.08039    | mir-977      | 2.19598    | mir-263a  | 1.46179   |
| chr2L | mir-276a                   | 1.91873  | mir-11    | 2.08551  | mir-282                   | 1.58233        | mir-996   | 1.19958        | mir-124    | 2.35303    | mir-274  | 2.60279    | mir-12     | 1.09602    | let-7     | 1.07663    | mir-274      | 2.14935    | mir-79    | 1.39712   |
| chr3L | mir-2a                     | 1.64508  | mir-9b    | 1.77317  | mir-996                   | 1.13781        | mir-276   | 1.15280        | mir-13b    | 2.20357    | let-7    | 2.39044    | mir-13b    | 1.08115    | mir-184   | 1.05731    | mir-976      | 2.04009    | mir-282   | 1.37663   |
| chr3L | mir-276                    | 0.94940  | mir-276a  | 1.62248  | mir-308                   | 1.06112        | mir-308   | 0.99607        | let-7      | 1.62439    | mir-124  | 2.28452    | mir-10     | 0.98418    | mir-13b   | 0.95693    | mir-9a       | 1.85601    | mir-11    | 1.34088   |
| chr2R | mir-8                      | 0.84006  | mir-12    | 1.57688  | mir-14                    | 0.99282        | mir-998   | 0.99113        | mir-1000   | 1.47162    | mir-252  | 1.76221    | mir-2b     | 0.93727    | mir-10    | 0.83951    | mir-983      | 1.82510    | mir-34    | 1.31839   |
| chr3R | mir-995                    | 0.78928  | mir-305   | 1.53819  | mir-998                   | 0.81005        | mir-276a  | 0.73590        | mir-263a   | 1.36504    | mir-13b  | 1.62700    | mir-281-1  | 0.90548    | mir-11    | 0.75229    | mir-9b       | 1.82375    | mir-305   | 1.08218   |
| chr2R | mir-277                    | 0.77711  | mir-2a    | 1.44698  | mir-276                   | 0.74252        | mir-79    | 0.69444        | mir-987    | 1.15961    | mir-9a   | 1.53286    | mir-304    | 0.88408    | mir-14    | 0.73860    | mir-14       | 1.82239    | mir-9c    | 0.93878   |
| chr3R | mir-305                    | 0.69694  | mir-306   | 0.91420  | mir-34                    | 0.62690        | mir-995   | 0.63562        | mir-252    | 1.13643    | mir-996  | 1.28801    | mir-184    | 0.78891    | mir-281-1 | 0.71807    | mir-988      | 1.03719    | mir-12    | 0.91588   |
| chr3R | mir-998                    | 0.65344  | mir-998   | 0.88647  | mir-995                   | 0.62232        | mir-34    | 0.58884        | mir-274    | 1.09402    | mir-263a | 1.21244    | mir-279    | 0.74956    | mir-31a   | 0.59703    | mir-2b       | 1.64237    | mir-33    | 0.83634   |
| chr2L | mir-306                    | 0.52465  | mir-9c    | 0.84265  | mir-79                    | 0.61202        | mir-14    | 0.52468        | mir-7      | 1.08173    | mir-1000 | 1.20431    | mir-11     | 0.74272    | mir-279   | 0.55596    | mir-960      | 1.47375    | mir-995   | 0.76444   |
| chr2L | mir-9b                     | 0.51688  | mir-995   | 0.83930  | mir-9a                    | 0.58760        | mir-275   | 0.51086        | mir-9a     | 0.95078    | mir-31a  | 1.03433    | mir-305    | 0.71838    | mir-263a  | 0.52228    | mir-13b      | 1.41302    | mir-14    | 0.63107   |
| chr2L | mir-79                     | 0.42874  | mir-79    | 0.80867  | mir-9b                    | 0.47962        | mir-33    | 0.44533        | mir-929    | 0.94692    | mir-11   | 1.00219    | mir-79     | 0.62466    | mir-305   | 0.49544    | mir-317      | 1.21701    | mir-1     | 0.62224   |
| chr2L | mir-2a                     | 0.42286  | mir-282   | 0.68950  | mir-33                    | 0.47275        | mir-9a    | 0.43289        | mir-31a    | 0.91492    | mir-7    | 0.60850    | mir-263a   | 0.60851    | mir-34    | 0.43546    | mir-316      | 1.19749    | mir-312   | 0.58247   |
| chr3L | mir-33                     | 0.40440  | mir-33    | 0.60276  | mir-276a                  | 0.44185        | mir-277   | 0.32768        | mir-305    | 0.89363    | mir-125  | 0.96574    | mir-31a    | 0.59811    | mir-12    | 0.37588    | mir-311      | 0.97111    | mir-276a  | 0.56319   |
| chr2L | mir-9c                     | 0.39789  | mir-277   | 0.37739  | mir-306                   | 0.40712        | mir-9b    | 0.32531        | mir-996    | 0.82355    | mir-305  | 0.95444    | mir-33     | 0.49554    | mir-9c    | 0.32609    | mir-310      | 0.90984    | mir-276   | 0.52462   |
| chrX  | mir-980                    | 0.32192  | mir-308   | 0.37672  | mir-252                   | 0.31708        | mir-317   | 0.30320        | mir-317    | 0.70743    | mir-276b | 0.78241    | mir-34     | 0.48268    | mir-79    | 0.29469    | mir-125      | 0.90306    | mir-7     | 0.48967   |
| chr3R | mir-1003                   | 0.31206  | mir-92a   | 0.33044  | mir-184                   | 0.30906        | mir-1     | 0.29669        | mir-279    | 0.65784    | mir-133  | 0.76965    | mir-958    | 0.37959    | mir-304   | 0.28288    | mir-278      | 0.65771    | mir-306   | 0.40612   |
| chr2R | mir-308                    | 0.31122  | mir-970   | 0.26494  | mir-277                   | 0.30792        | mir-279   | 0.29452        | mir-79     | 0.60700    | mir-987  | 0.74956    | mir-316    | 0.28530    | mir-958   | 0.28221    | mir-276a     | 0.60945    | let-7     | 0.33592   |
| chrX  | mir-970                    | 0.29324  | mir-2b    | 0.24593  | mir-278                   | 0.30410        | mir-306   | 0.22582        | mir-276b   | 0.57736    | mir-307  | 0.74442    | mir-9c     | 0.28334    | mir-278   | 0.27375    | mir-984      | 0.59671    | mir-31a   | 0.35390   |
| chr2R | mir-307                    | 0.19559  | mir-78    | 0.24571  | mir-9c                    | 0.28121        | mir-184   | 0.21418        | mir-999    | 0.56703    | mir-317  | 0.67901    | mir-133    | 0.26945    | mir-33    | 0.26490    | mir-975      | 0.57855    | mir-92a   | 0.31453   |
| chr2L | mir-965                    | 0.11731  | mir-981   | 0.21284  | mir-317                   | 0.27396        | mir-9c    | 0.18161        | mir-125    | 0.56561    | mir-929  | 0.62341    | mir-281-2  | 0.26235    | mir-281-2 | 0.23215    | mir-9c       | 0.55577    | mir-304   | 0.29846   |
| chr2L | mir-2b-1                   | 0.10451  | mir-283   | 0.20792  | mir-1                     | 0.25908        | mir-31a   | 0.15061        | mir-282    | 0.53936    | mir-79   | 0.62224    | mir-278    | 0.25546    | mir-125   | 0.23054    | mir-312      | 0.46197    | mir-984   | 0.28641   |
| chr2L | mir-275                    | 0.09674  | mir-1003  | 0.20166  | mir-988                   | 0.21291        | mir-252   | 0.12712        | mir-11     | 0.48946    | mir-279  | 0.60837    | mir-375    | 0.24167    | mir-316   | 0.22987    | mir-279      | 0.42130    | mir-313   | 0.25267   |
| chr2L | mir-2b-2                   | 0.09045  | mir-1000  | 0.19384  | mir-31a                   | 0.19879        | mir-965   | 0.11192        | mir-957    | 0.48513    | mir-957  | 0.57258    | mir-956    | 0.22336    | mir-9b    | 0.21578    | mir-375      | 0.40422    | mir-279   | 0.25106   |
| chrX  | mir-12                     | 0.08709  | mir-304   | 0.18803  | mir-2b-1                  | 0.17590        | mir-988   | 0.10640        | mir-13a    | 0.44209    | mir-999  | 0.49348    | mir-9b     | 0.21930    | mir-252   | 0.19055    | mir-92a      | 0.38606    | mir-317   | 0.21250   |
| chr2R | mir-7                      | 0.06967  | mir-275   | 0.18601  | mir-279                   | 0.12248        | mir-278   | 0.10383        | mir-307    | 0.44043    | mir-278  | 0.42620    | mir-252    | 0.20762    | mir-956   | 0.18693    | mir-31a      | 0.30744    | mir-281-1 | 0.20969   |
| chrX  | mir-13b-2                  | 0.06275  | mir-965   | 0.13593  | mir-1012                  | 0.08776        | mir-2b-1  | 0.09179        | mir-133    | 0.38123    | mir-13a  | 0.42396    | mir-274    | 0.18483    | mir-274   | 0.15821    | mir-252      | 0.38440    | mir-92b   | 0.20567   |
| chr3R | mir-999                    | 0.05184  | mir-92b   | 0.09994  | mir-986                   | 0.08051        | mir-10    | 0.07797        | mir-998    | 0.37453    | mir-932  | 0.40957    | mir-7      | 0.15484    | mir-7     | 0.12453    | mir-972      | 0.26054    | mir-2b-2  | 0.17916   |
| chr2R | mir-281-1                  | 0.03756  | mir-999   | 0.08362  | mir-10                    | 0.07593        | mir-1012  | 0.06830        | mir-10     | 0.29404    | mir-282  | 0.31584    | mir-980    | 0.15407    | mir-980   | 0.12185    | mir-306      | 0.25782    | mir-983   | 0.16590   |
| chr2L | mir-2a-1                   | 0.03631  | mir-990   | 0.06886  | mir-2b-2                  | 0.07211        | mir-7     | 0.05330        | mir-263b   | 0.28490    | mir-263b | 0.28057    | mir-124    | 0.14728    | mir-929   | 0.10990    | mir-963      | 0.25105    | mir-998   | 0.16189   |
| chr3L | mir-190                    | 0.03589  | mir-980   | 0.06752  | mir-970                   | 0.06754        | mir-986   | 0.04461        | mir-263b   | 0.24761    | mir-998  | 0.26211    | mir-317    | 0.12192    | mir-375   | 0.10883    | mir-31b      | 0.23722    | mir-2a-2  | 0.13618   |
| chr3R | mir-1012                   | 0.03442  | mir-13b-2 | 0.06707  | mir-7                     | 0.06715        | let-7     | 0.04323        | mir-278    | 0.22301    | mir-9c   | 0.25580    | mir-31b    | 0.10638    | mir-999   | 0.13867    | mir-7        | 0.23997    | mir-316   | 0.13377   |
| chr2R | mir-1008                   | 0.01973  | mir-2a-1  | 0.05791  | mir-965                   | 0.04998        | mir-970   | 0.03908        | mir-9c     | 0.20614    | mir-10   | 0.22399    | mir-307    | 0.10612    | mir-275   | 0.10239    | mir-92b      | 0.20252    | mir-308   | 0.12975   |
| chr2L | mir-263a                   | 0.01385  | mir-7     | 0.05433  | mir-190                   | 0.04960        | mir-2b-2  | 0.03494        | mir-87     | 0.18478    | mir-193  | 0.20983    | mir-986    | 0.09671    | mir-308   | 0.09179    | bantam       | 0.18625    | mir-986   | 0.12091   |
| chr2L | mir-1006                   | 0.01217  | mir-1008  | 0.03913  | mir-2a-2                  | 0.04273        | mir-190   | 0.03316        | mir-995    | 0.17776    | mir-2a-2 | 0.20960    | mir-308    | 0.09589    | mir-317   | 0.07528    | mir-999      | 0.18246    | mir-125   | 0.10083   |
| chr3L | mir-9a                     | 0.01028  | mir-989   | 0.03532  | mir-1006                  | 0.02709        | mir-2a-2  | 0.03237        | mir-193    | 0.15593    | mir-87   | 0.19189    | mir-929    | 0.09311    | mir-87    | 0.07179    | mir-275      | 0.16402    | mir-307   | 0.09842   |
| chr2R | mir-283                    | 0.01007  | mir-2b-1  | 0.03085  | mir-13b-2                 | 0.02366        | mir-281-1 | 0.02329        | mir-33     | 0.14694    | mir-9b   | 0.17409    | mir-306    | 0.08833    | mir-986   | 0.06844    | mir-304      | 0.15074    | mir-311   | 0.09560   |
| chr2R | mir-278                    | 0.00986  | mir-252   | 0.03063  | mir-281-1                 | 0.02099        | mir-1006  | 0.02112        | mir-2a-2   | 0.14032    | mir-33   | 0.16610    | mir-999    | 0.07531    | mir-306   | 0.06696    | mir-184      | 0.14640    | mir-988   | 0.08596   |
| chr2R | mir-286                    | 0.00902  | mir-281-1 | 0.02951  | mir-281-2                 | 0.02022        | mir-281-2 | 0.01658        | mir-2b-1   | 0.13275    | mir-995  | 0.15358    | mir-993    | 0.07449    | mir-307   | 0.06468    | mir-979      | 0.13474    | mir-2b-1  | 0.07552   |
| chr2R | mir-281-2                  | 0.00714  | mir-276b  | 0.02795  | mir-1003                  | 0.01297        | mir-13b-2 | 0.01382        | mir-9b     | 0.12274    | mir-316  | 0.15119    | mir-306    | 0.05926    | mir-124   | 0.06307    | mir-961      | 0.12932    | mir-281-2 | 0.07070   |
| chrX  | mir-304</                  |          |           |          |                           |                |           |                |            |            |          |            |            |            |           |            |              |            |           |           |

|          |             |         |             |         |             |         |             |         |             |         |            |         |             |         |             |         |             |         |             |         |
|----------|-------------|---------|-------------|---------|-------------|---------|-------------|---------|-------------|---------|------------|---------|-------------|---------|-------------|---------|-------------|---------|-------------|---------|
| chr2R    | mir-989     | 0.00063 | mir-284     | 0.00112 | mir-100     | 0.00038 | mir-314     | 0.00059 | mir-1003    | 0.00843 | mir-375    | 0.00850 | mir-974     | 0.01214 | mir-1008    | 0.00483 | mir-2b-2    | 0.01084 | mir-964     | 0.00201 |
| chr2R    | mir-313     | 0.00042 | mir-1013    | 0.00089 | mir-1010    | 0.00038 | mir-980     | 0.00059 | mir-1005    | 0.00796 | mir-1013   | 0.00612 | mir-1012    | 0.01106 | mir-1ab-4   | 0.00470 | mir-133     | 0.01030 | mir-1006    | 0.00161 |
| chr2R    | mir-992     | 0.00042 | mir-1016    | 0.00089 | mir-219     | 0.00038 | mir-981     | 0.00059 | mir-1013    | 0.00709 | mir-1007   | 0.00584 | mir-985     | 0.01101 | mir-1003    | 0.00456 | mir-137     | 0.01030 | mir-5       | 0.00161 |
| chr3R    | mir-10      | 0.00021 | mir-310     | 0.00089 | mir-276b    | 0.00038 | mir-1009    | 0.00039 | mir-954     | 0.00465 | mir-954    | 0.00579 | mir-997     | 0.00947 | mir-960     | 0.00456 | mir-971     | 0.00895 | mir-959     | 0.00161 |
| chr3R    | mir-1000    | 0.00021 | mir-978     | 0.00089 | mir-3       | 0.00038 | mir-932     | 0.00039 | mir-375     | 0.00449 | mir-1008   | 0.00486 | mir-961     | 0.00911 | mir-1001    | 0.00389 | mir-308     | 0.00813 | mir-991     | 0.00161 |
| chr2L    | mir-1005    | 0.00021 | mir-992     | 0.00089 | mir-307     | 0.00038 | mir-960     | 0.00039 | mir-92b     | 0.00426 | mir-960    | 0.00481 | mir-190     | 0.00833 | mir-1ab-4as | 0.00376 | mir-13a     | 0.00786 | mir-3       | 0.00121 |
| chr3R    | mir-1010    | 0.00021 | mir-125     | 0.00067 | mir-309     | 0.00038 | mir-969     | 0.00039 | mir-955     | 0.00426 | mir-13b-2  | 0.00472 | mir-1ab-4as | 0.00741 | mir-955     | 0.00349 | mir-314     | 0.00786 | mir-932     | 0.00080 |
| chr2R    | mir-1013    | 0.00021 | mir-133     | 0.00067 | mir-310     | 0.00038 | mir-993     | 0.00039 | mir-971     | 0.00315 | mir-1009   | 0.00397 | mir-303     | 0.00730 | mir-1013    | 0.00322 | mir-281-2   | 0.00569 | mir-983-1   | 0.00080 |
| chrX     | mir-210     | 0.00021 | mir-2282    | 0.00067 | mir-4       | 0.00038 | mir-994     | 0.00039 | mir-1016    | 0.00276 | mir-955    | 0.00392 | mir-1003    | 0.00638 | mir-2a-1    | 0.00295 | mir-318     | 0.00542 | mir-1008    | 0.00040 |
| chr3L    | mir-2282    | 0.00021 | mir-263a    | 0.00067 | mir-954     | 0.00038 | mir-1004    | 0.00020 | mir-2a-1    | 0.00268 | mir-1016   | 0.00355 | mir-1005    | 0.00628 | mir-219     | 0.00282 | mir-2c      | 0.00515 | mir-1013    | 0.00040 |
| chr3L    | mir-263b    | 0.00021 | mir-305-as  | 0.00067 | mir-962     | 0.00038 | mir-137     | 0.00020 | mir-1009    | 0.00236 | mir-314    | 0.00336 | mir-991     | 0.00617 | mir-1007    | 0.00255 | mir-994     | 0.00515 | mir-124     | 0.00040 |
| chr3L    | mir-274     | 0.00021 | mir-309     | 0.00067 | mir-966     | 0.00038 | mir-2279-as | 0.00020 | mir-960     | 0.00236 | mir-971    | 0.00327 | mir-982     | 0.00607 | mir-981     | 0.00255 | mir-284     | 0.00434 | mir-133     | 0.00040 |
| chr2R    | mir-307-as  | 0.00021 | mir-31b     | 0.00067 | let-7-as    | 0.00000 | mir-275-as  | 0.00020 | mir-962     | 0.00221 | mir-92b    | 0.00318 | mir-1001    | 0.00545 | mir-1015    | 0.00201 | mir-981     | 0.00434 | mir-193     | 0.00040 |
| chr2L    | mir-375     | 0.00021 | mir-6       | 0.00067 | mir-1-as    | 0.00000 | mir-284     | 0.00020 | mir-13b-2   | 0.00213 | mir-2a-1   | 0.00299 | mir-1008    | 0.00545 | mir-1004    | 0.00174 | mir-1ab-4as | 0.00434 | mir-2c      | 0.00040 |
| chr3R    | mir-929     | 0.00021 | mir-975     | 0.00067 | mir-1001    | 0.00000 | mir-3       | 0.00020 | mir-314     | 0.00142 | mir-962    | 0.00257 | mir-312     | 0.00489 | mir-311     | 0.00174 | mir-1006    | 0.00407 | mir-305-as  | 0.00040 |
| chr3L    | mir-958     | 0.00021 | mir-987     | 0.00067 | mir-1002    | 0.00000 | mir-318     | 0.00020 | mir-13b-1   | 0.00110 | mir-31b    | 0.00206 | mir-1ab-4   | 0.00484 | mir-954     | 0.00148 | mir-190     | 0.00352 | mir-955     | 0.00040 |
| chrX     | mir-977     | 0.00021 | mir-137     | 0.00045 | mir-1004    | 0.00000 | mir-954     | 0.00020 | mir-305-as  | 0.00095 | mir-964    | 0.00192 | mir-13b-2   | 0.00473 | mir-2c      | 0.00134 | mir-263b    | 0.00352 | mir-963     | 0.00040 |
| chrX     | mir-978     | 0.00021 | mir-263b    | 0.00045 | mir-1004-as | 0.00000 | mir-956     | 0.00020 | mir-984     | 0.00079 | mir-958    | 0.00135 | mir-219     | 0.00432 | mir-964     | 0.00134 | mir-2a-1    | 0.00352 | mir-985     | 0.00040 |
| chrX     | mir-981     | 0.00021 | mir-311     | 0.00045 | mir-1007    | 0.00000 | mir-958     | 0.00020 | mir-983     | 0.00071 | mir-13b-1  | 0.00103 | mir-285     | 0.00391 | mir-310     | 0.00121 | mir-315     | 0.00325 | mir-1ab-4   | 0.00040 |
| chr2L    | let-7-as    | 0.00000 | mir-313     | 0.00045 | mir-1011    | 0.00000 | mir-967     | 0.00020 | mir-1011    | 0.00063 | mir-5      | 0.00103 | mir-973     | 0.00391 | mir-927     | 0.00121 | mir-87      | 0.00325 | let-7-as    | 0.00000 |
| chr2L    | mir-1-as    | 0.00000 | mir-314     | 0.00045 | mir-1014    | 0.00000 | mir-971     | 0.00020 | mir-312     | 0.00063 | mir-956    | 0.00093 | mir-311     | 0.00350 | mir-1016    | 0.00107 | mir-1008    | 0.00298 | mir-1-as    | 0.00000 |
| chr2L    | mir-100     | 0.00000 | mir-100     | 0.00045 | mir-1015    | 0.00000 | let-7-as    | 0.00000 | mir-966     | 0.00063 | mir-961    | 0.00093 | mir-1015    | 0.00319 | mir-313     | 0.00107 | mir-210     | 0.00271 | mir-1000    | 0.00000 |
| chr3R    | mir-1001    | 0.00000 | mir-87      | 0.00045 | mir-1017    | 0.00000 | mir-1-as    | 0.00000 | mir-2279    | 0.00055 | mir-963    | 0.00093 | mir-972     | 0.00314 | mir-315     | 0.00094 | mir-958     | 0.00244 | mir-1001    | 0.00000 |
| chr2L    | mir-1002    | 0.00000 | mir-929     | 0.00045 | mir-137     | 0.00000 | mir-1001    | 0.00000 | mir-31b     | 0.00055 | mir-1011   | 0.00089 | mir-313     | 0.00304 | mir-983     | 0.00094 | mir-965     | 0.00244 | mir-1002    | 0.00000 |
| chr2L    | mir-1004    | 0.00000 | mir-974     | 0.00045 | mir-193     | 0.00000 | mir-1002    | 0.00000 | mir-5       | 0.00055 | mir-959    | 0.00084 | mir-955     | 0.00304 | mir-984     | 0.00094 | mir-3       | 0.00217 | mir-1004    | 0.00000 |
| chr2L    | mir-1004-as | 0.00000 | mir-210     | 0.00022 | mir-2279-as | 0.00000 | mir-1004-as | 0.00000 | mir-959     | 0.00055 | mir-2279   | 0.00075 | mir-981     | 0.00288 | mir-1017    | 0.00081 | mir-193     | 0.00190 | mir-1004-as | 0.00000 |
| chr3R    | mir-1011    | 0.00000 | mir-2279-as | 0.00022 | mir-2280    | 0.00000 | mir-1010    | 0.00000 | mir-964     | 0.00055 | mir-983    | 0.00075 | mir-310     | 0.00283 | mir-963     | 0.00081 | mir-955     | 0.00190 | mir-1011    | 0.00000 |
| chr3R    | mir-1014    | 0.00000 | mir-927     | 0.00022 | mir-2281    | 0.00000 | mir-1011    | 0.00000 | mir-961     | 0.00039 | mir-286    | 0.00070 | mir-1013    | 0.00267 | mir-966     | 0.00081 | mir-1ab-4   | 0.00190 | mir-1014    | 0.00000 |
| chr3R    | mir-1015    | 0.00000 | mir-956     | 0.00022 | mir-2282    | 0.00000 | mir-1014    | 0.00000 | mir-963     | 0.00039 | mir-966    | 0.00056 | mir-954     | 0.00257 | mir-969     | 0.00081 | mir-1007    | 0.00163 | mir-1015    | 0.00000 |
| chr3R    | mir-1017    | 0.00000 | mir-960     | 0.00022 | mir-2283    | 0.00000 | mir-1015    | 0.00000 | mir-974     | 0.00039 | mir-984    | 0.00051 | mir-1007    | 0.00242 | mir-961     | 0.00067 | mir-1016    | 0.00163 | mir-1016    | 0.00000 |
| chr2R    | mir-137     | 0.00000 | mir-963     | 0.00022 | mir-275-as  | 0.00000 | mir-1017    | 0.00000 | mir-286     | 0.00032 | mir-312    | 0.00042 | mir-992     | 0.00231 | mir-285     | 0.00054 | mir-956     | 0.00163 | mir-1017    | 0.00000 |
| chr3R    | mir-13b-1   | 0.00000 | mir-976     | 0.00022 | mir-287     | 0.00000 | mir-219     | 0.00000 | mir-313     | 0.00032 | mir-305-as | 0.00037 | mir-1004    | 0.00226 | mir-5       | 0.00054 | mir-989     | 0.00163 | mir-137     | 0.00000 |
| chr3L    | mir-219     | 0.00000 | mir-993     | 0.00022 | mir-289     | 0.00000 | mir-2280    | 0.00000 | mir-956     | 0.00032 | mir-318    | 0.00028 | mir-989     | 0.00226 | mir-1009    | 0.00040 | mir-1009    | 0.00136 | mir-13b-1   | 0.00000 |
| chr2Rhet | mir-2279-as | 0.00000 | mir-1ab-4   | 0.00022 | mir-303     | 0.00000 | mir-2281    | 0.00000 | mir-967     | 0.00032 | mir-989    | 0.00028 | mir-92b     | 0.00216 | mir-2279    | 0.00040 | mir-929     | 0.00108 | mir-210     | 0.00000 |
| chr2L    | mir-2280    | 0.00000 | let-7-as    | 0.00000 | mir-311     | 0.00000 | mir-2282    | 0.00000 | mir-2283    | 0.00024 | mir-3      | 0.00023 | mir-927     | 0.00211 | mir-959     | 0.00040 | mir-1005    | 0.00081 | mir-219     | 0.00000 |
| chr2L    | mir-2281    | 0.00000 | mir-31-as   | 0.00000 | mir-312     | 0.00000 | mir-2283    | 0.00000 | mir-3       | 0.00024 | mir-4      | 0.00023 | mir-1009    | 0.00195 | mir-982     | 0.00040 | mir-1011    | 0.00081 | mir-2279    | 0.00000 |
| chr3R    | mir-2283    | 0.00000 | mir-100     | 0.00000 | mir-313     | 0.00000 | mir-287     | 0.00000 | mir-4       | 0.00024 | mir-313    | 0.00019 | mir-975     | 0.00170 | mir-976     | 0.00027 | mir-2279    | 0.00081 | mir-2279-as | 0.00000 |
| chr2L    | mir-275-as  | 0.00000 | mir-1001    | 0.00000 | mir-315     | 0.00000 | mir-289     | 0.00000 | mir-958     | 0.00024 | mir-977    | 0.00019 | mir-2c      | 0.00139 | mir-985     | 0.00027 | mir-276b    | 0.00081 | mir-2280    | 0.00000 |
| chr2L    | mir-284     | 0.00000 | mir-1002    | 0.00000 | mir-318     | 0.00000 | mir-2c      | 0.00000 | mir-977     | 0.00024 | mir-2283   | 0.00014 | mir-969     | 0.00139 | mir-990     | 0.00027 | mir-987     | 0.00081 | mir-2281    | 0.00000 |
| chr3L    | mir-285     | 0.00000 | mir-1004    | 0.00000 | mir-31b     | 0.00000 | mir-303     | 0.00000 | mir-310     | 0.00016 | mir-303    | 0.00014 | mir-1017    | 0.00129 | mir-991     | 0.00027 | mir-1001    | 0.00054 | mir-2282    | 0.00000 |
| chr3L    | mir-287     | 0.00000 | mir-1004-as | 0.00000 | mir-6       | 0.00000 | mir-307     | 0.00000 | mir-968     | 0.00016 | mir-307-as | 0.00014 | mir-315     | 0.00123 | mir-13b-1   | 0.00013 | mir-1015    | 0.00054 | mir-2283    | 0.00000 |
| chr3L    | mir-289     | 0.00000 | mir-1005    | 0.00000 | mir-927     | 0.00000 | mir-309     | 0.00000 | mir-978     | 0.00016 | mir-968    | 0.00014 | mir-2a-1    | 0.00108 | mir-193     | 0.00013 | mir-2b-1    | 0.00054 | mir-263b    | 0.00000 |
| chr2L    | mir-305-as  | 0.00000 | mir-1011    | 0.00000 | mir-955     | 0.00000 | mir-310     | 0.00000 | mir-994     | 0.00016 | mir-978    | 0.00014 | mir-979     | 0.00108 | mir-2281    | 0.00013 | mir-1000    | 0.00027 | mir-275-as  | 0.00000 |
| chr3L    | mir-314     | 0.00000 | mir-1014    | 0.00000 | mir-956     | 0.00000 | mir-311     | 0.00000 | mir-1ab-4   | 0.00016 | mir-982    | 0.00014 | mir-1016    | 0.00093 | mir-286     | 0.00013 | mir-1017    | 0.00027 | mir-276b    | 0.00000 |
| chr3L    | mir-315     | 0.00000 | mir-1015    | 0.00000 | mir-958     | 0.00000 | mir-312     | 0.00000 | mir-1004-as | 0.00008 | mir-994    | 0.00014 | mir-5       | 0.00072 | mir-287     | 0.00013 | mir-13b-2   | 0.00027 | mir-285     | 0.00000 |
| chr3L    | mir-316     | 0.00000 | mir-1017    | 0.00000 | mir-959     | 0.00000 | mir-313     | 0.00000 | mir-275-as  | 0.00008 | mir-310    | 0.00009 | mir-193     | 0.00062 | mir-289     | 0.00013 | mir-219     | 0.00027 | mir-286     | 0.00000 |
| chr2L    | mir-87      | 0.00000 | mir-13b-1   | 0.00000 | mir-960     | 0.00000 | mir-315     | 0.00000 | mir-303     | 0.00008 | mir-311    | 0.00009 | mir-2279    | 0.00062 | mir-3       | 0.00013 | mir-2283    | 0.00027 | mir-287     | 0.00000 |
| chrX     | mir-927     | 0.00000 | mir-219     | 0.00000 | mir-961     | 0.00000 | mir-31b     | 0.00000 | mir-311     | 0.00008 | mir-967    | 0.00009 | mir-990     | 0.00041 | mir-303     | 0.00013 | mir-983-1   | 0.00027 | mir-289     | 0.00000 |
| chr3L    | mir-955     | 0.00000 | mir-2280    | 0.00000 | mir-963     | 0.00000 | mir-6       | 0.00000 | mir-318     | 0.00008 | mir-974    | 0.00009 | mir-307-as  | 0.00031 | mir-305-as  | 0.00013 | mir-993     | 0.00027 | mir-307-as  | 0.00000 |
| chr3L    | mir-956     | 0.00000 | mir-2281    | 0.00000 | mir-964     | 0.00000 | mir-927     | 0.00000 | mir-982     | 0.00008 | mir-976    | 0.00009 | mir-286     | 0.00026 | mir-307-as  | 0.00013 | let-7-as    | 0.00000 | mir-309     | 0.00000 |
| chr3L    | mir-957     | 0.00000 | mir-2283    | 0.00000 | mir-967     | 0.00000 | mir-955     | 0.00000 | mir-985     | 0.00008 | mir-1ab-4  | 0.00009 | mir-966     | 0.00026 | mir-973     | 0.00013 | mir-1-as    | 0.00000 | mir-315     | 0.00000 |
| chr2L    | mir-959     | 0.00000 | mir-274     | 0.00000 | mir-968     | 0.00000 | mir-959     | 0.00000 | mir-989     | 0.00008 | mir-1015   | 0.00005 | mir-13b-1   | 0.00021 | mir-974     | 0.00013 | mir-1002    | 0.00000 | mir-375     | 0.00000 |
| chr2L    | mir-960     | 0.00000 | mir-275-as  | 0.00000 | mir-969     | 0       |             |         |             |         |            |         |             |         |             |         |             |         |             |         |
